# Supplementary material for: Natural Enemies, Mediated by Landscape and Weather Conditions, Shape Response of the Sorghum Agroecosystem of North America to the Invasive Aphid Melanaphis sorghi
Source: Front Insect Sci. 2022 Apr 12;2:830997. doi: 10.3389/finsc.2022.830997 (PMC10926493; doi:10.3389/finsc.2022.830997)
Supplement: Supplementary file 1 [file Data_Sheet_1.xlsx]

## Sheet: README
Supplemental File 1: Data files.
The description and definitions of variables in the 87 data records used in the four-region comparison study and the component data used to generate the data records are provided below. The 87 year-county data records were used in the analyses of the four region comparative study (found in tab 87 records). As noted in text, sorghum fields sampled were in 4 states and 40 counties and categorized i…
The component insect data (component data tab) from all fields and sampling events (from which the 87 year-county data records are derived) are also available from the authors in a separate spreadsheet. Fields and sampling events are added as columns. The 87 rows for the aggregated year-county data records are retained as yellow-highlighted rows in the spreadsheet, with field and sampling event c…
Definition of terms used in the data files are below. They are the same for the 87 year-county spreadsheet and the component data spreadsheet except as noted for the added columns to identify individual fields and sampling events of the ‘component data’ and the insect averages, agro-landscape, and weather data provided in the ’87 year-county’ data.
Column Heading	data in 87recordsheet	data in component sheet	Definition
fourregion	x	x	sorghum growing region designation used in study for where data was collected from one or multiple fields in a county
county, state	x	x	county and state of record
Year	x	x	year iof record
Crop/habitat	.	x	crop/habitat of record, always grain sorghum
GPS (digital if known)	x	x	GPS coordinates if known for specific fields sampled, central point of county used for aggregate data
sampling event	.	x	date of specific sampling event, missing for aggregate data (87 records)
total alate	.	x	count of winged aphids if known
total apterae	.	x	count of unwinged aphids if known
SumTotalAphids	x	x	total count of winged and unwinged aphids
SumofLeaves	x	x	sum of leaves inspected in an aggregated data record
AphidsperLeaf	x	.	average total aphids per leaf
Sum of Time Pnts	x	.	sum of sampling events in an aggregated data record
Count of Fields	x	.	number of fields visiting in an aggregated data record
SumBlackMummies	x	x	count of black mummies
BlkMPerAphid	x	.	average of black mummies per sumtotal aphids for the 87 data record
BlkMPerLeaf	x	.	average of black mummies per leaf for the 87 data record
SumBrownMummies	x	x	count of brown mummies
BrnMPerAphid	x	.	average of brown mummies per sumtotal aphids for the 87 data record
BrnMPerLeaf	x	.	average of brown mummies per leaf for the 87 data record
SumAllMummies	x	.	count of all mummies (black and brown)
AllMPerAphid	x	.	average of all mummies per sumtotal aphids for the 87 data record
AllMPerLeaf	x	.	average of all mummies per leaf for the 87 data record
JuvLB	x	x	count of lady beetle larvae
Column Heading	data in 87recordsheet	data in component sheet	Definition
JuvLBperAphid	x	.	average of lady beetle larvae per sumtotal aphids for the 87 data record
JuvLBperLeaf	x	.	average of lady beetle larvae per leaf for the 87 data record
AdultLB	x	x	count of lady beetle adults
AdultLBperAphid	x	.	average of lady beetle adults per sumtotal aphids for the 87 data record
AdultLBperLeaf	x	.	average of lady beetle adults per leaf for the 87 data record
SumAllLB	x	.	count of all lady beetles
AllLBPerAphid	x	.	average of all lady beetles per sumtotal aphids for the 87 data record
AllLBPerLeaf	x	.	average of all lady beetles per leaf for the 87 data record
SumSyrphid	x	x	count of all syrphid larvae
SyrPerAphid	x	.	average of all syrphid larvae per sumtotal aphids for the 87 data record
SyrPerLeaf	x	.	average of all syrphid larvae per leaf for the 87 data record
SumLacewing	x	x	count of all lacewing larvae
LacePerAphid	x	.	average of lacewing larvae per sumtotal aphids for the 87 data record
LacePerLeaf	x	.	average of all lacewing larvae per leaf for the 87 data record
geo-county, state	x	.	county, state used to obtain landscape and weather data
All crops	x	.	number of pixels associated with corn, cotton, sorghum, other small grains, legumes, and non-alfalfa hays
Sorgum	x	.	number of pixels associated with sorghum
total pixels	x	.	total pixels in buffer, constant
Grassland/Pasture	x	.	number of pixels associated with various grass species and herbaceous vegetation managed for grazing and hay crops
Shrubland	x	.	number of pixels associated with woody shrubs less than 5 m in height including young or stressed trees and interspersed with grasses
Percent_allcrops	x	.	percent of pixels associated with corn, cotton, sorghum, other small grains, legumes, and non-alfalfa hays
Column Heading	data in 87recordsheet	data in component sheet	Definition
Percent_Sorgum	x	.	percent of pixels classified as sorghum
Percent_Pasture	x	.	percent of pixels associated with various grass species and herbaceous vegetation managed for grazing and hay crops
Percent_Shrub	x	.	percent of pixels associated with woody shrubs less than 5 m in height including young or stressed trees and interspersed with grasses
Area of Buffer(KM2)	x	.	area of buffer in square km, constant
firstdet = min of detect	x	.	date of first sampling event
daytopeak	x	.	date of last sampling event
avmintemp	x	.	minimum temperature (°C) derived from daily lowest temperatures
avmaxtemp	x	.	maximum temperature derived from daily highest temperatures
mintemp	x	.	minimum temperature (°C)
maxtemp	x	.	maximum temperature
daycumrain	x	.	cumulative rainfall (cm)
avgrainperday	x	.	rainfall (cm) derived from daily amount of rainfall

## Sheet: 87 records
fourregion	county, state	Year	GPS (digital if known)	Crop/habitat	regionN_S	regionC_E	regionNC_SC_NE	SumTotalAphids	SumofLeaves	AphidsperLeaf	Sum of Time Pnts	Count of Fields	SumBlackMummies	BlkMPerAphid	BlkMPerLeaf	SumBrownMummies	BrnMPerAphid	BrnMPerLeaf	SumAllMummies	AllMPerAphid	AllMPerLeaf	JuvLB	JuvLBperAphid	JuvLBperLeaf	AdultLB	AdultLBperAphid	AdultLBperLeaf	SumAllLB	AllLBPerAphid	AllLBPerLeaf	SumSyrphid	SyrPerAphid	SyrPerLeaf	SumLacewing	LacePerAphid	LacePerLeaf	Min of beginning	Max of end	Location	geo-county, state	All crops	Sorgum	total pixels	Grassland/Pasture	Shrubland	Percent_allcrops	Percent_Sorgum	Percent_Pasture	Percent_Shrub
South	Kleberg, TX	2017	27.529954°N, -97.633325°W	grain sorghum	south_N29	central	southcentral	43848	5286	8	50	10	3088	0.0704251	0.584185	10127	0.230957	1.91582	13215	0.301382	2.5	141	0.00321565	0.0266742	38	0.00086663	0.0071888	179	0.00408228	0.033863	64	0.00145959	0.0121075	30	0.000684182	0.00567537	42838	42879	Kingsville	Kleberg, TX	82952	43135	87247	75	3361	95.0772	49.4401	0.0859628	3.85228
South	Kleberg, TX	2018	27.529954°N, -97.633325°W	grain sorghum	south_N29	central	southcentral	2804	1660	1.68916	15	9	494	0.176177	0.29759	35	0.0124822	0.0210843	529	0.188659	0.318675	2	0.000713267	0.00120482	18	0.0064194	0.0108434	20	0.00713267	0.0120482	13	0.00463623	0.00783133	1	0.000356633	0.00060241	43242	43269	Kingsville	Kleberg, TX	83107	39801	87247	138	2402	95.2549	45.6188	0.158172	2.7531
South	Kleberg, TX	2019	27.529954°N, -97.633325°W	grain sorghum	south_N29	central	southcentral	2890	2400	1.20417	20	12	2335	0.807958	0.972917	8	0.00276817	0.00333333	2343	0.810727	0.97625	19	0.00657439	0.00791667	7	0.00242215	0.00291667	26	0.00899654	0.0108333	19	0.00657439	0.00791667	1	0.000346021	0.000416667	43608	43641	Kingsville	Kleberg, TX	82615	41566	87247	403	2416	94.6909	47.6418	0.461907	2.76915
South	Nueces, TX	2015	27.769908° N, -97.562039° W	grain sorghum	south_N29	central	southcentral	447003	6400	69.8442	16	3	9960	0.0222817	1.55625	0	0	0	9960	0.0222817	1.55625	1583	0.00354136	0.247344	206	0.000460847	0.0321875	1789	0.00400221	0.279531	973	0.00217672	0.152031	0	0	0	42179	42214	Corpus Christi	Nueces, TX	70388	57603	87242	650	2667	80.6813	66.0267	0.745054	3.05701
South	Nueces, TX	2016	27.769908° N, -97.562039° W	grain sorghum	south_N29	central	southcentral	470187	38400	12.2445	20	2	2103	0.00447269	0.0547656	0	0	0	2103	0.00447269	0.0547656	1278	0.00271807	0.0332812	384	0.000816696	0.01	1662	0.00353476	0.0432813	419	0.000891135	0.0109115	0	0	0	42509	42577	Corpus Christi	Nueces, TX	78673	44490	87242	835	2345	90.1779	50.9961	0.957108	2.68793
South	Nueces, TX	2017	27.769908° N, -97.562039° W	grain sorghum	south_N29	central	southcentral	83456	14400	5.79556	9	1	2479	0.0297043	0.172153	129	0.00154572	0.00895833	2608	0.03125	0.181111	286	0.00342696	0.0198611	78	0.000934624	0.00541667	364	0.00436158	0.0252778	51	0.0006111	0.00354167	32	0.000383436	0.00222222	42880	42936	Corpus Christi	Nueces, TX	78796	35296	87242	734	2206	90.3189	40.4576	0.841338	2.5286
South	Nueces, TX	2018	27.769908° N, -97.562039° W	grain sorghum	south_N29	central	southcentral	172431	5760	29.9359	3	1	3887	0.0225424	0.674826	15	8.69913e-05	0.00260417	3902	0.0226293	0.677431	452	0.00262134	0.0784722	38	0.000220378	0.00659722	490	0.00284172	0.0850694	35	0.00020298	0.00607639	42	0.000243576	0.00729167	43265	43293	Corpus Christi	Nueces, TX	79190	37629	87242	552	1896	90.7705	43.1317	0.632723	2.17327
South	Nueces, TX	2019	27.769908° N, -97.562039° W	grain sorghum	south_N29	central	southcentral	24753	2880	8.59479	9	1	3174	0.128227	1.10208	87	0.00351473	0.0302083	3261	0.131742	1.13229	5	0.000201996	0.00173611	30	0.00121197	0.0104167	35	0.00141397	0.0121528	11	0.000444391	0.00381944	6	0.000242395	0.00208333	43619	43678	Corpus Christi	Nueces, TX	76372	38461	87242	1511	2077	87.5404	44.0854	1.73196	2.38073
South	Jim Wells, TX	2017	27.803905°N, 97.916888°W	grain sorghum	south_N29	central	southcentral	4038	5016	0.805024	14	7	1100	0.272412	0.219298	112	0.0277365	0.0223285	1212	0.300149	0.241627	26	0.00643883	0.00518341	14	0.00346706	0.00279107	40	0.00990589	0.00797448	37	0.00916295	0.0073764	14	0.00346706	0.00279107	42850	42857	Agua Dulce	Jim Wells, TX	66520	26059	87239	6478	9758	76.2503	29.8708	7.42558	11.1854
South	Jim Wells, TX	2018	27.803905°N, 97.916888°W	grain sorghum	south_N29	central	southcentral	318	1200	0.265	10	7	256	0.805031	0.213333	2	0.00628931	0.00166667	258	0.811321	0.215	1	0.00314465	0.000833333	0	0	0	1	0.00314465	0.000833333	4	0.0125786	0.00333333	1	0.00314465	0.000833333	43237	43251	Agua Dulce	Jim Wells, TX	67070	30853	87239	5806	9223	76.8808	35.3661	6.65528	10.5721
South	Jim Wells, TX	2019	27.803905°N, 97.916888°W	grain sorghum	south_N29	central	southcentral	232	1068	0.217228	9	4	220	0.948276	0.205993	0	0	0	220	0.948276	0.205993	4	0.0172414	0.00374532	2	0.00862069	0.00187266	6	0.0258621	0.00561798	0	0	0	1	0.00431034	0.00093633	43613	43629	Agua Dulce	Jim Wells, TX	65245	17816	87239	7816	9215	74.7888	20.4221	8.9593	10.5629
South	Fort Bend, TX	2016	29.558962°N, 95.807364°W	grain sorghum	north_N29	central	northcentral	447843	13440	33.3217	5	1	20	4.46585e-05	0.0014881	0	0	0	20	4.46585e-05	0.0014881	17	3.79597e-05	0.00126488	21	4.68914e-05	0.0015625	38	8.48512e-05	0.00282738	60	0.000133976	0.00446429	0	0	0	42517	42570	Rosenburg	Fort Bend, TX	13630	4945	87245	22164	2035	15.6227	5.66795	25.4043	2.33251
South	Fort Bend, TX	2017	29.558962°N, 95.807364°W	grain sorghum	north_N29	central	northcentral	77952	15360	5.075	4	1	35	0.000448994	0.00227865	36	0.000461823	0.00234375	71	0.000910817	0.0046224	68	0.000872332	0.00442708	31	0.000397681	0.00201823	99	0.00127001	0.00644531	103	0.00132133	0.00670573	21	0.000269397	0.00136719	42878	42913	Rosenburg	Fort Bend, TX	14090	2138	87245	22526	1541	16.1499	2.45057	25.8192	1.76629
South	Fort Bend, TX	2018	29.558962°N, 95.807364°W	grain sorghum	north_N29	central	northcentral	340187	17900	19.0049	12	2	12519	0.0368003	0.699385	0	0	0	12519	0.0368003	0.699385	887	0.00260739	0.0495531	35	0.000102885	0.00195531	922	0.00271027	0.0515084	171	0.000502665	0.00955307	42	0.000123462	0.00234637	43243	43291	Rosenburg	Fort Bend, TX	16397	4718	87245	20548	2061	18.7942	5.40776	23.5521	2.36231
South GP	Burleson, TX	2015	30.523613° N, -96.401023° W	grain sorghum	north_N29	central	northcentral	209685	1120	187.219	7	1	1128	0.0053795	1.00714	2	9.53812e-06	0.00178571	1130	0.00538904	1.00893	1108	0.00528412	0.989286	200	0.000953812	0.178571	1308	0.00623793	1.16786	239	0.0011398	0.213393	161	0.000767818	0.14375	42229	42294	College Station	Burleson, TX	42047	5359	87251	20250	3255	48.1909	6.14205	23.2089	3.73062
South GP	Burleson, TX	2016	30.523613° N, -96.401023° W	grain sorghum	north_N29	central	northcentral	227286	4000	56.8215	10	1	1161	0.0051081	0.29025	0	0	0	1161	0.0051081	0.29025	256	0.00112633	0.064	36	0.000158391	0.009	292	0.00128472	0.073	55	0.000241986	0.01375	55	0.000241986	0.01375	42533	42631	College Station	Burleson, TX	44778	7394	87251	21577	2179	51.3209	8.4744	24.7298	2.49739
South GP	Cooke, TX	2016	33.639398°N, 97.147577°W	grain sorghum	north_N29	central	northcentral	488549	19200	25.4453	10	1	916	0.00187494	0.0477083	0	0	0	916	0.00187494	0.0477083	148	0.000302938	0.00770833	212	0.000433938	0.0110417	360	0.000736876	0.01875	29	5.93595e-05	0.00151042	0	0	0	42533	42596	Gainesville	Cooke, TX	10160	1531	87245	43419	5	11.6454	1.75483	49.7667	0.00573099
South GP	Cooke, TX	2017	33.639398°N, 97.147577°W	grain sorghum	north_N29	central	northcentral	183542	8400	21.8502	5	1	2959	0.0161217	0.352262	0	0	0	2959	0.0161217	0.352262	1627	0.00886446	0.19369	160	0.000871735	0.0190476	1787	0.00973619	0.212738	107	0.000582973	0.0127381	195	0.00106243	0.0232143	42915	42966	Gainesville	Cooke, TX	10798	1030	87245	43656	43	12.3766	1.18058	50.0384	0.0492865
South GP	Cooke, TX	2018	33.639398°N, 97.147577°W	grain sorghum	north_N29	central	northcentral	24960	3840	6.5	2	1	620	0.0248397	0.161458	0	0	0	620	0.0248397	0.161458	61	0.00244391	0.0158854	1	4.00641e-05	0.000260417	62	0.00248397	0.0161458	1	4.00641e-05	0.000260417	24	0.000961538	0.00625	43283	43303	Gainesville	Cooke, TX	12225	1704	87245	42034	184	14.0123	1.95312	48.1793	0.2109
North GP	Garfield, OK	2017	36.21422N, 98.01362W	grain sorghum	north_N29	central	northcentral	5567	4752	1.17151	17	7	2	0.00035926	0.000420875	0	0	0	2	0.00035926	0.000420875	10	0.0017963	0.00210438	4	0.00071852	0.000841751	14	0.00251482	0.00294613	6	0.00107778	0.00126263	3	0.00053889	0.000631313	42888	43011	ncok	Garfield, OK	55301	2173	87239	22644	0	63.3902	2.49086	25.9563	0
North GP	Noble, OK	2017	36.23226N, 97.07277W	grain sorghum	north_N29	central	northcentral	6924	2592	2.6713	12	4	39	0.00563258	0.0150463	0	0	0	39	0.00563258	0.0150463	27	0.00389948	0.0104167	0	0	0	27	0.00389948	0.0104167	13	0.00187753	0.00501543	8	0.0011554	0.00308642	42887	42978	ncok	Noble, OK	14800	1153	87238	56356	28	16.9651	1.32167	64.6003	0.0320961
North GP	Grant, OK	2017	36.70195N, 97.55369w	grain sorghum	north_N29	central	northcentral	14157	1512	9.3631	14	2	240	0.0169527	0.15873	0	0	0	279	0.0197076	0.184524	33	0.002331	0.0218254	3	0.000211909	0.00198413	36	0.00254291	0.0238095	83	0.00586282	0.0548942	4	0.000282546	0.0026455	42907	43011	ncok	Grant, OK	11298	72	87234	28975	0	12.9514	0.0825366	33.2153	0
North GP	Kay, OK	2017	36.81032N, 97.43284W	grain sorghum	north_N29	central	northcentral	2476	2268	1.09171	15	3	14	0.00565428	0.00617284	0	0	0	14	0.00565428	0.00617284	11	0.00444265	0.00485009	0	0	0	11	0.00444265	0.00485009	45	0.0181745	0.0198413	6	0.00242326	0.0026455	42895	43011	ncok	Kay, OK	65211	3666	87232	13084	0	74.7558	4.20259	14.9991	0
North GP	Harvey, KS	2017	37.05909N, 97.18128W	grain sorghum	north_N29	central	northcentral	9983	2268	4.40168	11	2	33	0.00330562	0.0145503	0	0	0	50	0.00500851	0.0220459	41	0.00410698	0.0180776	11	0.00110187	0.00485009	52	0.00520886	0.0229277	1	0.00010017	0.000440917	1	0.00010017	0.000440917	42934	43011	ncok	Harvey, KS	52687	4276	87252	65612	554	60.3849	4.90075	75.1983	0.634942
North GP	Garfield, OK	2018	36.21422N, 98.01362W	grain sorghum	north_N29	central	northcentral	4913	3456	1.42159	10	4	41	0.00834521	0.0118634	0	0	0	42	0.00854875	0.0121528	2	0.000407083	0.000578704	6	0.00122125	0.00173611	8	0.00162833	0.00231481	6	0.00122125	0.00173611	9	0.00183187	0.00260417	43256	43342	ncok	Garfield, OK	57458	734	87239	21266	2	65.8627	0.841367	24.3767	0.00229255
North GP	Noble, OK	2018	36.23226N, 97.07277W	grain sorghum	north_N29	central	northcentral	13746	1620	8.48519	11	2	53	0.00385567	0.032716	0	0	0	53	0.00385567	0.032716	71	0.00516514	0.0438272	19	0.00138222	0.0117284	90	0.00654736	0.0555556	4	0.000290994	0.00246914	3	0.000218245	0.00185185	43256	43355	ncok	Noble, OK	14745	2013	87238	54998	22	16.902	2.30748	63.0436	0.0252184
North GP	Grant, OK	2018	36.70195N, 97.55369w	grain sorghum	north_N29	central	northcentral	1607	1728	0.929977	10	2	0	0	0	0	0	0	0	0	0	3	0.00186683	0.00173611	4	0.00248911	0.00231481	7	0.00435594	0.00405093	4	0.00248911	0.00231481	2	0.00124456	0.00115741	43256	43343	ncok	Grant, OK	63107	673	87251	16528	105	72.3281	0.771338	18.943	0.120342
North GP	Kay, OK	2018	36.81032N, 97.43284W	grain sorghum	north_N29	central	northcentral	2242	972	2.30658	9	1	0	0	0	0	0	0	0	0	0	3	0.00133809	0.00308642	4	0.00178412	0.00411523	7	0.00312221	0.00720165	1	0.00044603	0.00102881	4	0.00178412	0.00411523	43256	43342	ncok	Kay, OK	67737	1454	87232	11632	2	77.6515	1.66682	13.3346	0.00229274
North GP	Sumner, KS	2018	37.05565N, 97.19477W	grain sorghum	north_N29	central	northcentral	13768	2592	5.31173	15	4	90	0.0065369	0.0347222	0	0	0	90	0.0065369	0.0347222	24	0.00174317	0.00925926	15	0.00108948	0.00578704	39	0.00283266	0.0150463	9	0.00065369	0.00347222	3	0.000217897	0.00115741	43256	43355	ncok	Sumner, KS	53380	9455	87246	25508	0	61.1833	10.8372	29.2369	0
North GP	Garfield, OK	2019	36.21422N, 98.01362W	grain sorghum	north_N29	central	northcentral	169968	3358	50.6158	11	5	245	0.00144145	0.0729601	0	0	0	245	0.00144145	0.0729601	30	0.000176504	0.00893389	10	5.88346e-05	0.00297796	40	0.000235338	0.0119119	129	0.000758966	0.0384157	22	0.000129436	0.00655152	43654	43740	ncok	Garfield, OK	58917	966	87239	21010	44	67.5352	1.1073	24.0833	0.0504362
North GP	Noble, OK	2019	36.23226N, 97.07277W	grain sorghum	north_N29	central	northcentral	578	1200	0.481667	9	2	0	0	0	0	0	0	0	0	0	0	0	0	2	0.00346021	0.00166667	2	0.00346021	0.00166667	0	0	0	1	0.0017301	0.000833333	43654	43727	ncok	Noble, OK	16069	1776	87238	53000	424	18.4197	2.03581	60.7533	0.486027
North GP	Grant, OK	2019	36.70195N, 97.55369w	grain sorghum	north_N29	central	northcentral	14146	1140	12.4088	8	3	144	0.0101796	0.126316	0	0	0	188	0.01329	0.164912	22	0.00155521	0.0192982	5	0.000353457	0.00438596	27	0.00190867	0.0236842	18	0.00127244	0.0157895	11	0.000777605	0.00964912	43679	43740	ncok	Grant, OK	65966	746	87251	16809	108	75.6049	0.855005	19.2651	0.123781
North GP	Kay, OK	2019	36.81032N, 97.43284W	grain sorghum	north_N29	central	northcentral	2258	1070	2.11028	9	2	5	0.00221435	0.0046729	0	0	0	5	0.00221435	0.0046729	0	0	0	2	0.00088574	0.00186916	2	0.00088574	0.00186916	0	0	0	1	0.00044287	0.000934579	43654	43735	ncok	Kay, OK	68084	7240	87232	12592	3	78.0493	8.29971	14.4351	0.0034391
South GP	Hill, TX	2017	31.92904N, 97.10237W	grain sorghum	north_N29	central	northcentral	10308	1680	6.13571	7	3	193	0.0187233	0.114881	0	0	0	193	0.0187233	0.114881	29	0.00281335	0.0172619	23	0.00223128	0.0136905	52	0.00504463	0.0309524	5	0.00048506	0.00297619	2	0.000194024	0.00119048	42870	42930	ntex	Hill, Tx	49413	1387	87255	28376	5	56.6306	1.58959	32.5208	0.00573033
South GP	Hill, TX	2018	31.92904N, 97.10237W	grain sorghum	north_N29	central	northcentral	17851	1080	16.5287	5	3	548	0.0306986	0.507407	0	0	0	548	0.0306986	0.507407	0	0	0	20	0.00112039	0.0185185	20	0.00112039	0.0185185	2	0.000112039	0.00185185	18	0.00100835	0.0166667	43263	43279	ntex	Hill, Tx	50985	1326	87255	26397	77	58.4322	1.51968	30.2527	0.0882471
South GP	Hunt, TX	2018	33.16931N, 96.16778W	grain sorghum	north_N29	central	northcentral	1671	240	6.9625	2	1	0	0	0	0	0	0	0	0	0	0	0	0	0	0	0	0	0	0	0	0	0	0	0	0	43293	43300	ntex	Hunt, Tx	32618	1048	87246	37780	216	37.3862	1.2012	43.3028	0.247576
South GP	Cooke, TX	2018	33.73483N, 97.08667W	grain sorghum	north_N29	central	northcentral	88	360	0.244444	1	3	20	0.227273	0.0555556	0	0	0	20	0.227273	0.0555556	0	0	0	0	0	0	0	0	0	0	0	0	4	0.0454545	0.0111111	43263	43278	ntex	Cooke, Tx	3698	51	87235	28102	31	4.23912	0.0584628	32.2141	0.0355362
North GP	Beaver, OK	2017	36.52987N, 100.57195W	grain sorghum	north_N29	central	northcentral	1894	3780	0.501058	10	7	40	0.0211193	0.010582	0	0	0	498	0.262936	0.131746	2	0.00105597	0.000529101	4	0.00211193	0.0010582	6	0.0031679	0.0015873	0	0	0	3	0.00158395	0.000793651	42923	43024	phok	Beaver, OK	43370	10326	87254	16480	2198	49.7055	11.8344	18.8874	2.51908
North GP	Woodward, OK	2017	36.57654N, 99.5837W	grain sorghum	north_N29	central	northcentral	13	648	0.0200617	5	2	0	0	0	0	0	0	0	0	0	0	0	0	1	0.0769231	0.00154321	1	0.0769231	0.00154321	0	0	0	0	0	0	42923	42969	phok	Woodward, OK	14262	81	87253	58043	1437	16.3456	0.0928335	66.5226	1.64693
North GP	Harper, OK	2017	36.62058N, 99.98204W	grain sorghum	north_N29	central	northcentral	78	648	0.12037	6	1	0	0	0	0	0	0	1	0.0128205	0.00154321	0	0	0	1	0.0128205	0.00154321	1	0.0128205	0.00154321	0	0	0	0	0	0	42923	42976	phok	Harper, OK	11556	1155	87244	65612	554	13.2456	1.32387	75.2052	0.635001
North GP	Texas, OK	2017	36.67876N, 101.339W	grain sorghum	north_N29	central	northcentral	1917	1728	1.10938	9	2	4	0.00208659	0.00231481	0	0	0	87	0.0453834	0.0503472	1	0.000521648	0.000578704	1	0.000521648	0.000578704	2	0.0010433	0.00115741	0	0	0	10	0.00521648	0.00578704	42928	43024	phok	Texas, OK	41712	2897	87235	33629	1488	47.8157	3.32091	38.5499	1.70574
North GP	Cimarron, OK	2017	36.72792N, 102.47385W	grain sorghum	north_N29	central	northcentral	1773	2700	0.656667	9	5	14	0.00789622	0.00518519	0	0	0	2920	1.64693	1.08148	8	0.00451213	0.00296296	1	0.000564016	0.00037037	9	0.00507614	0.00333333	3	0.00169205	0.00111111	5	0.00282008	0.00185185	42928	43024	phok	Cimarron, OK	46172	10080	87251	32004	185	52.9186	11.5529	36.6804	0.212032
South GP	Kiowa, OK	2018	34.91353N, 98.82925W	grain sorghum	north_N29	central	northcentral	24862	1296	19.1836	6	2	30	0.00120666	0.0231481	0	0	0	403	0.0162095	0.310957	3	0.000120666	0.00231481	8	0.000321776	0.00617284	11	0.000442442	0.00848765	3	0.000120666	0.00231481	8	0.000321776	0.00617284	43292	43356	phok	Kiowa, OK	38401	1483	87263	57808	391	44.0061	1.69946	66.2457	0.448071
North GP	Texas, OK	2018	36.67876N, 101.339W	grain sorghum	north_N29	central	northcentral	1725	540	3.19444	5	1	2	0.00115942	0.0037037	0	0	0	2	0.00115942	0.0037037	1	0.00057971	0.00185185	4	0.00231884	0.00740741	5	0.00289855	0.00925926	0	0	0	0	0	0	43292	43339	phok	Texas, OK	44378	2199	87235	32313	2629	50.8718	2.52078	37.0413	3.0137
North GP	Cimarron, OK	2018	36.72792N, 102.47385W	grain sorghum	north_N29	central	northcentral	3374	1404	2.40313	7	2	0	0	0	0	0	0	89	0.0263782	0.0633903	0	0	0	8	0.00237107	0.00569801	8	0.00237107	0.00569801	0	0	0	1	0.000296384	0.000712251	43292	43356	phok	Cimarron, OK	36248	14627	87251	31367	687	41.5445	16.7643	35.9503	0.787384
North GP	Sumner, KS	2019	37.05565N, 97.19477W	grain sorghum	north_N29	central	northcentral	750	756	0.992063	7	1	8	0.0106667	0.010582	0	0	0	10	0.0133333	0.0132275	1	0.00133333	0.00132275	2	0.00266667	0.0026455	3	0.004	0.00396825	1	0.00133333	0.00132275	1	0.00133333	0.00132275	43292	43356	phok	Sumner, KS	53380	9455	87246	25508	0	61.1833	10.8372	29.2369	0
North GP	Major, OK	2019	36.3032N, 98.556W	grain sorghum	north_N29	central	northcentral	411	768	0.535156	8	1	3	0.00729927	0.00390625	0	0	0	3	0.00729927	0.00390625	0	0	0	0	0	0	0	0	0	6	0.0145985	0.0078125	3	0.00729927	0.00390625	43663	43745	phok	Major, OK	46189	188	87238	34822	29	52.946	0.215502	39.9161	0.0332424
North GP	Garfield, OK	2019	36.21422N, 98.01362W	grain sorghum	north_N29	central	northcentral	126	216	0.583333	2	1	8	0.0634921	0.037037	0	0	0	8	0.0634921	0.037037	0	0	0	0	0	0	0	0	0	0	0	0	0	0	0	43663	43675	phok	Garfield, OK	58917	966	87239	21010	44	67.5352	1.1073	24.0833	0.0504362
North GP	Beaver, OK	2019	36.52987N, 100.57195W	grain sorghum	north_N29	central	northcentral	1180	2400	0.491667	8	5	5	0.00423729	0.00208333	0	0	0	5	0.00423729	0.00208333	0	0	0	2	0.00169492	0.000833333	2	0.00169492	0.000833333	0	0	0	2.5	0.00211864	0.00104167	43663	43745	phok	Beaver, OK	40842	11704	87254	7986	11486	46.8082	13.4137	9.15259	13.1639
North GP	Texas, OK	2019	36.67876N, 101.339W	grain sorghum	north_N29	central	northcentral	4052	1740	2.32874	9	3	852	0.210267	0.489655	0	0	0	866	0.213722	0.497701	17	0.00419546	0.00977011	35	0.00863771	0.0201149	52	0.0128332	0.0298851	0	0	0	0	0	0	43663	43745	phok	Texas, OK	39098	4496	87235	17475	17970	44.8192	5.15389	20.0321	20.5995
North GP	Cimarron, OK	2019	36.72792N, 102.47385W	grain sorghum	north_N29	central	northcentral	82	1512	0.0542328	9	2	0	0	0	0	0	0	0	0	0	0	0	0	0	0	0	0	0	0	0	0	0	6	0.0731707	0.00396825	43663	43747	phok	Cimarron, OK	46904	13666	87251	28744	3089	53.7576	15.6629	32.944	3.54036
North GP	Tillman, OK	2017	34.40746N, 99.16803W	grain sorghum	north_N29	central	northcentral	2002	324	6.17901	3	1	9	0.0044955	0.0277778	0	0	0	9	0.0044955	0.0277778	0	0	0	0	0	0	0	0	0	0	0	0	1	0.0004995	0.00308642	42977	42991	swok	Tillman, OK	65260	2135	87219	10657	4769	74.8231	2.44786	12.2187	5.46785
North GP	Jackson,OK	2017	34.51436N, 99.26239W	grain sorghum	north_N29	central	northcentral	4085	4103	0.995613	15	4	126	0.0308446	0.0307092	0	0	0	126	0.0308446	0.0307092	5	0.00122399	0.00121862	6	0.00146879	0.00146234	11	0.00269278	0.00268097	13	0.00318237	0.00316841	5	0.00122399	0.00121862	42886	42991	swok	Jackson,OK	66301	239	87230	5518	8667	76.0071	0.273988	6.32581	9.9358
South GP	Kiowa, OK	2017	34.91214N, 98.63917W	grain sorghum	north_N29	central	northcentral	2634	2376	1.10859	13	3	10	0.00379651	0.00420875	0	0	0	11	0.00417616	0.00462963	2	0.000759301	0.000841751	27	0.0102506	0.0113636	29	0.0110099	0.0122054	1	0.000379651	0.000420875	0	0	0	42886	42977	swok	Kiowa,OK	34392	7594	87263	19635	22234	39.4119	8.70243	22.5009	25.4793
North GP	Caddo,OK	2017	34.98545N, 98.60335W	grain sorghum	north_N29	central	northcentral	3708	1512	2.45238	14	1	21	0.00566343	0.0138889	0	0	0	21	0.00566343	0.0138889	9	0.00242718	0.00595238	0	0	0	9	0.00242718	0.00595238	0	0	0	1	0.000269687	0.000661376	42886	42983	swok	Caddo,OK	46643	780	87239	34320	157	53.4658	0.894096	39.3402	0.179965
North GP	Canadian,OK	2017	35.4653N, 97.8741W	grain sorghum	north_N29	central	northcentral	75265	540	139.38	3	2	25	0.00033216	0.0462963	0	0	0	33	0.000438451	0.0611111	64	0.000850329	0.118519	2	2.65728e-05	0.0037037	66	0.000876902	0.122222	70	0.000930047	0.12963	2	2.65728e-05	0.0037037	42977	42991	swok	Canadian,OK	53230	2546	87247	22655	0	61.0107	2.91815	25.9665	0
North GP	Tillman, OK	2018	34.40746N, 99.16803W	grain sorghum	north_N29	central	northcentral	5678	1836	3.09259	10	3	0	0	0	0	0	0	0	0	0	9	0.00158507	0.00490196	8	0.00140895	0.0043573	17	0.00299401	0.00925926	2	0.000352237	0.00108932	7	0.00123283	0.00381264	43250	43329	swok	Tillman, OK	67826	787	87219	10625	4523	77.7652	0.902326	12.182	5.1858
North GP	Jackson,OK	2018	34.51436N, 99.26239W	grain sorghum	north_N29	central	northcentral	11	972	0.0113169	9	1	0	0	0	0	0	0	0	0	0	0	0	0	0	0	0	0	0	0	0	0	0	0	0	0	43250	43313	swok	Jackson,OK	68383	357	87230	5368	8810	78.3939	0.409263	6.15385	10.0997
South GP	Kiowa, OK	2018	34.91214N, 98.63917W	grain sorghum	north_N29	central	northcentral	1344	3132	0.429119	10	7	1	0.000744048	0.000319285	0	0	0	1	0.000744048	0.000319285	0	0	0	7	0.00520833	0.00223499	7	0.00520833	0.00223499	1	0.000744048	0.000319285	0	0	0	43250	43329	swok	Kiowa,OK	38401	1483	87263	17297	24628	44.0061	1.69946	19.8217	28.2227
North GP	Caddo,OK	2018	34.98545N, 98.60335W	grain sorghum	north_N29	central	northcentral	11	432	0.025463	4	1	0	0	0	0	0	0	0	0	0	0	0	0	0	0	0	0	0	0	0	0	0	0	0	0	43250	43272	swok	Caddo,OK	47255	781	87239	33179	776	54.1673	0.895242	38.0323	0.88951
North GP	Garfield, OK	2018	36.21422N, 98.01362W	grain sorghum	north_N29	central	northcentral	10260	588	17.449	5	2	24	0.00233918	0.0408163	0	0	0	24	0.00233918	0.0408163	9	0.000877193	0.0153061	4	0.000389864	0.00680272	13	0.00126706	0.0221088	1	9.74659e-05	0.00170068	0	0	0	43283	43329	swok	Garfield, OK	57458	734	87239	21266	2	65.8627	0.841367	24.3767	0.00229255
South GP	Tillman, OK	2019	34.40746N, 99.16803W	grain sorghum	north_N29	central	northcentral	8405	288	29.184	3	1	379	0.0450922	1.31597	0	0	0	379	0.0450922	1.31597	37	0.00440214	0.128472	8	0.000951814	0.0277778	45	0.00535396	0.15625	1	0.000118977	0.00347222	28	0.00333135	0.0972222	43649	43661	swok	Tillman, OK	66079	3272	87219	11156	4201	75.7622	3.75148	12.7908	4.81661
South GP	Jackson,OK	2019	34.51436N, 99.26239W	grain sorghum	north_N29	central	northcentral	21954	1620	13.5519	8	3	495	0.0225471	0.305556	0	0	0	495	0.0225471	0.305556	1	4.55498e-05	0.000617284	10	0.000455498	0.00617284	11	0.000501048	0.00679012	0	0	0	1	4.55498e-05	0.000617284	43640	43692	swok	Jackson,OK	67530	639	87230	6396	8822	77.416	0.732546	7.33234	10.1135
South GP	Greer,OK	2019	34.791633N, 99.405867W	grain sorghum	north_N29	central	northcentral	5540	540	10.2593	5	1	29	0.00523466	0.0537037	0	0	0	29	0.00523466	0.0537037	1	0.000180505	0.00185185	2	0.000361011	0.0037037	3	0.000541516	0.00555556	0	0	0	1	0.000180505	0.00185185	43640	43670	swok	Greer,OK	65649	2656	87255	60	15467	75.2381	3.04395	0.068764	17.7262
South GP	Caddo,OK	2019	34.98545N, 98.60335W	grain sorghum	north_N29	central	northcentral	2616	840	3.11429	8	1	71	0.0271407	0.0845238	0	0	0	73	0.0279052	0.0869048	3	0.00114679	0.00357143	4	0.00152905	0.0047619	7	0.00267584	0.00833333	1	0.000382263	0.00119048	4	0.00152905	0.0047619	43649	43705	swok	Caddo,OK	47419	1660	87239	34690	721	54.3553	1.90282	39.7643	0.826465
South GP	Grady, OK	2019	35.043858N, 97.915437W	grain sorghum	north_N29	central	northcentral	15460	840	18.4048	8	1	704	0.0455369	0.838095	0	0	0	704	0.0455369	0.838095	10	0.000646831	0.0119048	2	0.000129366	0.00238095	12	0.000776197	0.0142857	0	0	0	5	0.000323415	0.00595238	43649	43705	swok	Grady, OK	26349	240	87229	26047	206	30.2067	0.275138	29.8605	0.23616
North GP	Oldham, TX	2017	35.19891N, 102.33038W	grain sorghum	north_N29	central	northcentral	21523	2112	10.1908	11	2	1	4.64619e-05	0.000473485	0	0	0	14	0.000650467	0.00662879	12	0.000557543	0.00568182	16	0.000743391	0.00757576	28	0.00130093	0.0132576	0	0	0	1	4.64619e-05	0.000473485	42943	42997	wtex	Oldham, TX	32619	3080	87228	49540	229	37.3951	3.53098	56.7937	0.26253
North GP	Potter, TX	2017	35.21199N, 102.05326W	grain sorghum	north_N29	central	northcentral	28885	383	75.4178	4	1	0	0	0	0	0	0	1	3.462e-05	0.00261097	2	6.92401e-05	0.00522193	4	0.00013848	0.0104439	6	0.00020772	0.0156658	9	0.00031158	0.0234987	6	0.00020772	0.0156658	42969	42993	wtex	Potter, TX	28367	1868	87246	36589	13487	32.5138	2.14107	41.9377	15.4586
South GP	Randall, TX	2018	35.12778N, 101.72417W	grain sorghum	north_N29	central	northcentral	262757	2496	105.271	11	3	10	3.8058e-05	0.00400641	0	0	0	20	7.6116e-05	0.00801282	947	0.00360409	0.379407	272	0.00103518	0.108974	1219	0.00463927	0.488381	81	0.00030827	0.0324519	83	0.000315881	0.0332532	43294	43355	wtex	Randall, TX	36111	7877	87246	40808	573	41.3899	9.02849	46.7735	0.656764
North GP	Potter, TX	2018	35.21199N, 102.05326W	grain sorghum	north_N29	central	northcentral	300885	672	447.746	6	1	14	4.65294e-05	0.0208333	0	0	0	93	0.000309088	0.138393	791	0.00262891	1.17708	305	0.00101368	0.453869	1096	0.00364259	1.63095	73	0.000242618	0.108631	18	5.98235e-05	0.0267857	43305	43353	wtex	Potter, TX	29477	2073	87246	31257	16037	33.7861	2.37604	35.8263	18.3814
North GP	Oldham, TX	2018	35.19891N, 102.33038W	grain sorghum	north_N29	central	northcentral	473352	1248	379.288	13	1	4	8.45037e-06	0.00320513	0	0	0	10	2.11259e-05	0.00801282	880	0.00185908	0.705128	238	0.000502797	0.190705	1118	0.00236188	0.895833	67	0.000141544	0.0536859	108	0.00022816	0.0865385	43293	43376	wtex	Oldham, TX	30429	2750	87228	49256	279	34.8844	3.15266	56.4681	0.319851
South	Refugio, TX	2019	28.1583N, 97.2419W	grain sorghum	south_N29	central	southcentral	3465	120	28.875	2	1	313	0.0903319	2.60833	4	0.0011544	0.0333333	317	0.0914863	2.64167	39	0.0112554	0.325	8	0.0023088	0.0666667	47	0.0135642	0.391667	0	0	0	2	0.000577201	0.0166667	43636	43640	Bonnie View	Refugio, TX	87242	22201	87242	2705	2543	100	25.4476	3.10057	2.91488
South	Calhoun, TX	2019	28.6037N, 96.6849W	grain sorghum	south_N29	central	southcentral	10928	165	66.2303	3	1	2053	0.187866	12.4424	11	0.00100659	0.0666667	2064	0.188873	12.5091	292	0.0267204	1.7697	67	0.00613104	0.406061	359	0.0328514	2.17576	35	0.00320278	0.212121	3	0.000274524	0.0181818	43636	43648	Port Lavaca	Calhoun, TX	49660	3417	86873	15510	1625	57.1639	3.93333	17.8536	1.87055
South	Hidalgo, TX	2019	26.1918N, 97.9059W	grain sorghum	south_N29	central	southcentral	21288	144	147.833	1	2	2541	0.119363	17.6458	4385	0.205985	30.4514	6926	0.325348	48.0972	395	0.0185551	2.74306	76	0.00357009	0.527778	471	0.0221251	3.27083	35	0.00164412	0.243056	10	0.000469748	0.0694444	43614	43614	RGV	Hidalgo, TX	57661	7425	87240	5885	3638	66.0947	8.511	6.74576	4.17011
South	Cameron, TX	2019	26.2798N, 97.6619W	grain sorghum	south_N29	central	southcentral	51	72	0.708333	1	1	115	2.2549	1.59722	4	0.0784314	0.0555556	119	2.33333	1.65278	1	0.0196078	0.0138889	2	0.0392157	0.0277778	3	0.0588235	0.0416667	1	0.0196078	0.0138889	0	0	0	43614	43614	RGV	Cameron, TX	76768	23830	87237	1556	2034	87.9994	27.3164	1.78365	2.33158
South	Willacy, TX	2019	26.3582N, 97.6860W	grain sorghum	south_N29	central	southcentral	203	72	2.81944	1	1	53	0.261084	0.736111	2	0.00985222	0.0277778	55	0.270936	0.763889	1	0.00492611	0.0138889	0	0	0	1	0.00492611	0.0138889	0	0	0	4	0.0197044	0.0555556	43614	43614	RGV	Willacy, TX	82563	28253	87252	618	433	94.6259	32.3809	0.708293	0.496264
South	Fort Bend, TX	2019	29.5083N, 95.8701W	grain sorghum	south_N29	central	southcentral	606	60	10.1	1	1	35	0.0577558	0.583333	0	0	0	35	0.0577558	0.583333	6	0.00990099	0.1	0	0	0	6	0.00990099	0.1	6	0.00990099	0.1	0	0	0	43636	43636	Rosenburg	Fort Bend, TX	29580	6512	87240	22812	491	33.9065	7.46447	26.1486	0.562815
South	San Patricio, TX	2019	27.9821N, 97.5047W	grain sorghum	south_N29	central	southcentral	6552	240	27.3	2	2	815	0.124389	3.39583	70	0.0106838	0.291667	885	0.135073	3.6875	129	0.0196886	0.5375	16	0.002442	0.0666667	145	0.0221306	0.604167	3	0.000457875	0.0125	4	0.000610501	0.0166667	43621	43626	Sinton	San Patricio, TX	72979	29406	87257	3238	3732	83.6368	33.7004	3.71088	4.27702
South E	Shorter, AL	2018	32.424389N, 85.889639W	grain sorghum	north_N29	east	northeast	100956	1440	70.1083	5	1	368	0.00364515	0.255556	40	0.000396212	0.0277778	408	0.00404136	0.283333	121	0.00119854	0.0840278	60	0.000594318	0.0416667	181.085	0.0017937	0.125754	1	9.90531e-06	0.000694444	3	2.97159e-05	0.00208333	43293	43321	EVS	Shorter, AL	19939	3	87235	5925	12127	22.8567	0.00343899	6.792	13.9015
South E	Shorter, AL	2019	32.422444N, 85.890667W	grain sorghum	north_N29	east	northeast	264500	1150	230	5	1	5002	0.0189112	4.34957	47	0.000177694	0.0408696	5049	0.0190888	4.39043	304	0.00114934	0.264348	68	0.000257089	0.0591304	372.265	0.00140743	0.323709	60	0.000226843	0.0521739	6	2.26843e-05	0.00521739	43656	43678	EVS	Shorter, AL	21037	21	87235	7227	3035	24.1153	0.0240729	8.28452	3.47911
South E	Shorter, AL	2016	32.422444N, 85.890667W	grain sorghum	north_N29	east	northeast	343140	4800	71.4875	5	1	271	0.000789765	0.0564583	125	0.000364283	0.0260417	422	0.00122982	0.0879167	6	1.74856e-05	0.00125	110	0.000320569	0.0229167	116	0.000338054	0.0241667	91	0.000265198	0.0189583	27	7.86851e-05	0.005625	42584	42612	EVS-FC	Shorter, AL	16702	55	87235	4807	8902	19.146	0.0630481	5.5104	10.2046
South E	Headland, AL	2016	31.354640N, 85.326409W	grain sorghum	north_N29	east	northeast	116658	6400	18.2278	5	1	109	0.000934355	0.0170313	81	0.000694337	0.0126563	316	0.00270877	0.049375	33	0.000282878	0.00515625	59	0.000505752	0.00921875	92	0.00078863	0.014375	98	0.000840062	0.0153125	24	0.00020573	0.00375	42572	42600	WREC	Headland, AL	48216	129	87247	1721	10804	55.2638	0.147856	1.97256	12.3832
South E	Headland, AL	2015	31.354640N, 85.326409W	grain sorghum	north_N29	east	northeast	733377	2040	359.499	4	2	37	5.04515e-05	0.0181373	26	3.54524e-05	0.0127451	63	8.5904e-05	0.0308824	27	3.6816e-05	0.0132353	52	7.09049e-05	0.0254902	79	0.000107721	0.0387255	84	0.000114539	0.0411765	18	2.4544e-05	0.00882353	42208	42229	WREC	Headland, AL	49302	536	87247	1415	11132	56.5085	0.614348	1.62183	12.7592
South E	Tallassee, AL	2015	32.496151N, 85.890921W	grain sorghum	north_N29	east	northeast	250971	1600	156.857	4	1	57	0.000227118	0.035625	10	3.98452e-05	0.00625	67	0.000266963	0.041875	16	6.37524e-05	0.01	93	0.000370561	0.058125	111	0.000442282	0.069375	27	0.000107582	0.016875	10	3.98452e-05	0.00625	42206	42228	PBU	Tallassee, AL	26102	89	87242	5128	9324	29.9191	0.102015	5.8779	10.6875
South E	Prattville, AL	2015	32.426550N, 86.445955W	grain sorghum	north_N29	east	northeast	301361	5280	57.0759	7	1	115	0.000381602	0.0217803	5	1.65914e-05	0.00094697	120	0.000398194	0.0227273	16	5.30925e-05	0.0030303	173	0.000574062	0.0327652	189	0.000627155	0.0357955	58	0.00019246	0.0109848	43	0.000142686	0.00814394	42205	42254	Prattville	Prattville, AL	9850	23	87233	5048	7190	11.2916	0.0263662	5.7868	8.24229
South E	Brewton, AL	2015	31.140646N, 87.048516W	grain sorghum	north_N29	east	northeast	671934	3020	222.495	5	2	150	0.000223236	0.0496689	26	3.86943e-05	0.00860927	176	0.00026193	0.0582781	16	2.38119e-05	0.00529801	50	7.4412e-05	0.0165563	66.0053	9.82318e-05	0.0218561	70	0.000104177	0.0231788	23	3.42295e-05	0.00761589	42206	42226	Brewton	Brewton, AL	3786	2	87242	4102	14236	4.33965	0.00229247	4.70186	16.3178
South E	Fairhope, AL	2015	30.546251N, 87.880608W	grain sorghum	north_N29	east	northeast	35669	800	44.5862	2	1	30	0.000841066	0.0375	8	0.000224284	0.01	38	0.00106535	0.0475	0	0	0	8	0.000224284	0.01	8	0.000224284	0.01	2	5.60711e-05	0.0025	0	0	0	42207	42213	GCREC	Fairhope, AL	16460	139	71212	7393	3304	23.1141	0.195192	10.3817	4.63967
[truncated: 9 more columns]

## Sheet: component data
fourregion	county, state	Year	Crop/habitat	GPS (digital if known)	sampling event	total alate	total apterae	SumTotalAphids	SumofLeaves	AphidsperLeaf	Sum of Time Pnts	Count of Fields	SumBlackMummies	BlkMPerAphid	BlkMPerLeaf	SumBrownMummies	BrnMPerAphid	BrnMPerLeaf	SumAllMummies	AllMPerAphid	AllMPerLeaf	JuvLB	JuvLBperAphid	JuvLBperLeaf	AdultLB	AdultLBperAphid	AdultLBperLeaf	SumAllLB	AllLBPerAphid	AllLBPerLeaf	SumSyrphid	SyrPerAphid	SyrPerLeaf	SumLacewing	LacePerAphid	LacePerLeaf	Min of beginning	Max of end	Location	goe-county, state	All crops	Sorgum	total pixels	Percent_allcrops	Percent_Sorgum	Percent_Pasture	Percent_Shrub	Area of Buffer(KM2)	firstdet = min of detect
South	Kleberg, TX	2017	grain sorghum	27.529954N,-97.633325W				43848	5286	8	50	10	3088	0.0704251	0.584185	10127	0.230957	1.91582	13215	0.301382	2.5	141	0.00321565	0.0266742	38	0.00086663	0.0071888	179	0.00408228	0.033863	64	0.00145959	0.0121075	30	0.000684182	0.00567537	2017-04-13	2017-05-24	Kingsville	Kleberg, TX	82952	43135	87247	95.0772	49.4401	0.0859628	3.85228	78.5223	2017-04-13
South	Kleberg, TX	2017	grain sorghum	27.5344N,-97.5722W	2017-05-10	2	12	14	120				2			0						0			0						0			0
South	Kleberg, TX	2017	grain sorghum	27.5344N,-97.5722W	2017-05-17	2	84	86	120				8			0						0			1						1			0
South	Kleberg, TX	2017	grain sorghum	27.5344N,-97.5722W	2017-05-24	13	810	823	120				48			2						0			0						0			0
South	Kleberg, TX	2017	grain sorghum	27.5344N,-97.5722W	2017-06-12	6	76	82	120				24			0						1			0						0			0
South	Kleberg, TX	2017	grain sorghum	27.5344N,-97.5722W	2017-06-28	1	63	64	114				14			6						1			0						0			0
South	Kleberg, TX	2017	grain sorghum	27.5673N,-97.6343W	2017-06-12	1	174	175	120				59			365						0			1						0			4
South	Kleberg, TX	2017	grain sorghum	27.5324N,-97.5983W	2017-05-10	2	49	51	120				3			8						1			1						0			1
South	Kleberg, TX	2017	grain sorghum	27.5324N,-97.5983W	2017-05-17	0	58	58	120				2			0						0			3						0			0
South	Kleberg, TX	2017	grain sorghum	27.5324N,-97.5983W	2017-05-24	0	88	88	120				7			3						0			0						0			0
South	Kleberg, TX	2017	grain sorghum	27.5324N,-97.5983W	2017-05-30	6	115	121	120				10			1						2			1						0			1
South	Kleberg, TX	2017	grain sorghum	27.5324N,-97.5983W	2017-06-05	3	13	16	120				0			5						1			1						0			1
South	Kleberg, TX	2017	grain sorghum	27.5324N,-97.5983W	2017-06-12	4	32	36	120				10			51						0			0						0			0
South	Kleberg, TX	2017	grain sorghum	27.5324N,-97.5983W	2017-06-20	5	37	42	120				12			17						2			0						0			0
South	Kleberg, TX	2017	grain sorghum	27.5402N,-97.6390W	2017-05-10	6	204	210	120				5			41						1			1						1			1
South	Kleberg, TX	2017	grain sorghum	27.5402N,-97.6390W	2017-05-17	2	40	42	120				18			2						0			0						0			0
South	Kleberg, TX	2017	grain sorghum	27.5402N,-97.6390W	2017-05-24	7	201	208	120				49			12						0			0						1			0
South	Kleberg, TX	2017	grain sorghum	27.5402N,-97.6390W	2017-05-30	25	741	766	120				56			76						0			1						4			0
South	Kleberg, TX	2017	grain sorghum	27.5402N,-97.6390W	2017-06-05	33	2975	3008	120				229			55						31			2						3			26
South	Kleberg, TX	2017	grain sorghum	27.5402N,-97.6390W	2017-06-12	234	16046	16280	120				116			432						6			1						3			7
South	Kleberg, TX	2017	grain sorghum	27.5402N,-97.6390W	2017-06-20	160	3619	3779	120				241			1023						6			2						2			4
South	Kleberg, TX	2017	grain sorghum	27.5402N,-97.6390W	2017-06-28	13	7883	7896	240				942			4132						2			1						0			4
South	Kleberg, TX	2017	grain sorghum	27.5402N,-97.6390W	2017-07-19	1	291	292	120				1			33						4			0						0			1
South	Kleberg, TX	2017	grain sorghum	27.5033N,-97.6200W	2017-05-17	0	61	61	120				5			7						0			0						0			0
South	Kleberg, TX	2017	grain sorghum	27.5646N,-97.6446W	2017-05-10	5	327	332	120				19			42						0			6						1			2
South	Kleberg, TX	2017	grain sorghum	27.5646N,-97.6446W	2017-05-17	9	478	487	120				19			26						0			4						0			0
South	Kleberg, TX	2017	grain sorghum	27.5646N,-97.6446W	2017-05-24	25	2441	2466	120				102			143						5			2						1			4
South	Kleberg, TX	2017	grain sorghum	27.5646N,-97.6446W	2017-05-30	24	2398	2422	120				169			97						27			2						2			3
South	Kleberg, TX	2017	grain sorghum	27.5646N,-97.6446W	2017-06-05	2	8	10	120				68			272						2			0						0			1
South	Kleberg, TX	2017	grain sorghum	27.4822N,-97.6443W	2017-05-10	3	22	25	120				0			3						0			0						1			0
South	Kleberg, TX	2017	grain sorghum	27.5119N,-97.5756W	2017-05-10	0	1	1	60				1			0						0			0						0			0
South	Kleberg, TX	2017	grain sorghum	27.5119N,-97.5756W	2017-05-17	3	42	45	120				7			0						0			1						0			0
South	Kleberg, TX	2017	grain sorghum	27.5119N,-97.5756W	2017-05-24	15	639	654	120				25			2						0			0						0			0
South	Kleberg, TX	2017	grain sorghum	27.5119N,-97.5756W	2017-05-30	30	1963	1993	120				97			207						35			1						2			2
South	Kleberg, TX	2017	grain sorghum	27.5119N,-97.5756W	2017-06-05	29	160	189	120				14			30						8			1						0			1
South	Kleberg, TX	2017	grain sorghum	27.5119N,-97.5756W	2017-06-12	4	13	17	120				4			24						0			0						3			0
South	Kleberg, TX	2017	grain sorghum	27.5119N,-97.5756W	2017-06-20	0	504	504	120				139			2239						2			0						0			0
South	Kleberg, TX	2017	grain sorghum	27.5119N,-97.5756W	2017-06-28	3	36	39	120				522			647						0			0						0			0
South	Kleberg, TX	2017	grain sorghum	27.5099N,-97.5706W	2017-05-10	2	37	39	174				2			0						0			1						0			1
South	Kleberg, TX	2017	grain sorghum	27.5099N,-97.5706W	2017-05-17	0	50	50	120				0			0						0			0						3			0
South	Kleberg, TX	2017	grain sorghum	27.5099N,-97.5706W	2017-05-24	4	122	126	120				17			0						1			0						0			0
South	Kleberg, TX	2017	grain sorghum	27.5099N,-97.5706W	2017-06-05	24	65	89	126				14			7						1			2						1			0
South	Kleberg, TX	2017	grain sorghum	27.5099N,-97.5706W	2017-06-12	3	159	162	120				6			116						2			2						1			0
South	Kleberg, TX	2018	grain sorghum	27.529954N, -97.633325W				2804	1660	1.68916	15	9	494	0.176177	0.29759	35	0.0124822	0.0210843	529	0.188659	0.318675	2	0.000713267	0.00120482	18	0.0064194	0.0108434	20	0.00713267	0.0120482	13	0.00463623	0.00783133	1	0.000356633	0.00060241	2018-05-22	2018-06-18	Kingsville	Kleberg, TX	83107	39801	87247	95.2549	45.6188	0.158172	2.7531	78.5223	2018-05-22
South	Kleberg, TX	2018	grain sorghum	27.55972N,-97.5885W	2018-05-29	5	1399	1404	100				175			5						2			1						5			1
South	Kleberg, TX	2018	grain sorghum	27.50874N,-97.6195W	2018-06-18	0	0	0	120				6			6						0			0						0			0
South	Kleberg, TX	2018	grain sorghum	27.50182N,-97.6319W	2018-05-29	0	22	22	100				10			0						0			0						0			0
South	Kleberg, TX	2018	grain sorghum	27.48564N,-97.6151W	2018-05-29	1	6	7	100				2			7						0			0						0			0
South	Kleberg, TX	2018	grain sorghum	27.49745N,-97.6457W	2018-05-29	0	8	8	100				5			2						0			0						1			0
South	Kleberg, TX	2018	grain sorghum	27.49745N,-97.6457W	2018-06-18	0	262	262	120				13			0						0			0						0			0
South	Kleberg, TX	2018	grain sorghum	27.46736N,-97.6591W	2018-05-29	0	9	9	100				6			0						0			0						0			0
South	Kleberg, TX	2018	grain sorghum	27.51209N,-97.5957W	2018-06-05	0	0	0	120				39			1						0			0						0			0
South	Kleberg, TX	2018	grain sorghum	27.51209N,-97.5957W	2018-06-18	0	1	1	120				45			8						0			0						0			0
South	Kleberg, TX	2018	grain sorghum	27.53246N,-97.5568W	2018-05-22	15	593	608	120				12			0						0			0						1			0
South	Kleberg, TX	2018	grain sorghum	27.53246N,-97.5568W	2018-05-29	5	371	376	100				105			0						0			17						2			0
South	Kleberg, TX	2018	grain sorghum	27.5163N,-97.5652W	2018-05-29	0	68	68	100				12			1						1			0						2			0
South	Kleberg, TX	2018	grain sorghum	27.5163N,-97.5652W	2018-06-05	0	18	18	120				31			1						0			1						1			0
South	Kleberg, TX	2018	grain sorghum	27.5163N,-97.5652W	2018-06-12	0	16	16	120				22			0						1			0						1			0
South	Kleberg, TX	2018	grain sorghum	27.5163N,-97.5652W	2018-06-18	0	0	0	120				23			2						0			0						0			0
South	Kleberg, TX	2019	grain sorghum	27.529954N,-97.633325W				2890	2400	1.20417	20	12	2335	0.807958	0.972917	8	0.00276817	0.00333333	2343	0.810727	0.97625	19	0.00657439	0.00791667	7	0.00242215	0.00291667	26	0.00899654	0.0108333	19	0.00657439	0.00791667	1	0.000346021	0.000416667	2019-05-23	2019-06-25	Kingsville	Kleberg, TX	82615	41566	87247	94.6909	47.6418	0.461907	2.76915	78.5223	2019-05-23
South	Kleberg, TX	2019	grain sorghum	27.54623N,-97.5547W	2019-06-04	85	1690	1775	120				98			1						3			1						14			0
South	Kleberg, TX	2019	grain sorghum	27.53506N,-97.5505W	2019-06-18	1	26	27	120				4			0						0			0						0			0
South	Kleberg, TX	2019	grain sorghum	27.5392N,-975500W	2019-06-04	10	81	91	120				6			0						1			0						2			0
South	Kleberg, TX	2019	grain sorghum	27.53509N,-975503W	2019-06-18	0	13	13	120				3			0						0			0						0			0
South	Kleberg, TX	2019	grain sorghum	27.55815N,-97.6391W	2019-05-23	101	0	112	120				37			0						0			0						0			0
South	Kleberg, TX	2019	grain sorghum	27.55815N,-97.6391W	2019-05-30	2	19	21	120				50			0						0			0						0			0
South	Kleberg, TX	2019	grain sorghum	27.55815N,-97.6391W	2019-06-11	1	1	2	120				107			0						0			0						0			0
South	Kleberg, TX	2019	grain sorghum	27.55584N,-97.6019W	2019-05-23	21	5	26	120				0			0						0			0						0			0
South	Kleberg, TX	2019	grain sorghum	27.55584N,-97.6019W	2019-05-30	2	33	35	120				17			0						0			0						0			0
South	Kleberg, TX	2019	grain sorghum	27.55584N,-97.6019W	2019-06-04	1	6	7	120				19			0						0			0						0			0
South	Kleberg, TX	2019	grain sorghum	27.54582N,-97.6412W	2019-05-30	0	9	9	120				96			0						0			0						0			0
South	Kleberg, TX	2019	grain sorghum	27.54582N,-97.6412W	2019-06-11	1	16	17	120				850			0						0			1						0			1
South	Kleberg, TX	2019	grain sorghum	27.54582N,-97.6412W	2019-06-25	3	96	99	120				94			1						0			0						0			0
South	Kleberg, TX	2019	grain sorghum	27.53068N,-97.6646W	2019-05-30	2	22	24	120				167			0						0			0						0			0
South	Kleberg, TX	2019	grain sorghum	27.48763N,-97.6962W	2019-05-23	153	13	166	120				53			0						0			0						1			1
South	Kleberg, TX	2019	grain sorghum	27.48763N,-97.6962W	2019-05-30	2	44	46	120				42			0						1			2						0			0
South	Kleberg, TX	2019	grain sorghum	27.48763N,-97.6962W	2019-06-04	2	190	192	120				722			18						16			5						3			1
South	Kleberg, TX	2019	grain sorghum	27.53316N,-97.564W	2019-06-25	2	114	116	120				16			4						0			0						0			0
South	Kleberg, TX	2019	grain sorghum	27.5007N,-97.5743W	2019-06-04	8	4	12	120				11			1						0			0						0			0
South	Kleberg, TX	2019	grain sorghum	27.5007N,-97.5743W	2019-06-25	1	99	100	120				40			3						0			1						0			0
South	Nueces, TX	2015	grain sorghum	27.769908 N, -97.562039 W				447003	6400	69.8442	16	3	9960	0.0222817	1.55625	0	0	0	9960	0.0222817	1.55625	1583	0.00354136	0.247344	206	0.000460847	0.0321875	1789	0.00400221	0.279531	973	0.00217672	0.152031	0	0	0	2015-06-24	2015-07-29	Corpus Christi	Nueces, TX	70388	57603	87242	80.6813	66.0267	0.745054	3.05701	78.5178	2015-06-24
South	Nueces, TX	2015	grain sorghum	27.769908 N, -97.562039 W	2015-05-21		4	4	400
South	Nueces, TX	2015	grain sorghum	27.769908 N, -97.562039 W	2015-05-27		201	201	400
South	Nueces, TX	2015	grain sorghum	27.769908 N, -97.562039 W	2015-06-03		1785	1785	400
South	Nueces, TX	2015	grain sorghum	27.769908 N, -97.562039 W	2015-06-10		1130	1130	400
South	Nueces, TX	2015	grain sorghum	27.769908 N, -97.562039 W	2015-06-15		2323	2323	400
South	Nueces, TX	2015	grain sorghum	27.769908 N, -97.562039 W	2015-06-24		1790	1790	400				253									25			3						46
South	Nueces, TX	2015	grain sorghum	27.769908 N, -97.562039 W	2015-06-29		1019	1019	400				120									13			4						13
South	Nueces, TX	2015	grain sorghum	27.769908 N, -97.562039 W	2015-07-06		714	714	400				43									6			2						4			1
South	Nueces, TX	2015	grain sorghum	27.769908 N, -97.562039 W	2015-07-13		242	242	400				47									2			3						0			2
South	Nueces, TX	2015	grain sorghum	27.769908 N, -97.562039 W	2015-07-20		56	56	400				2									0			0						0			0
South	Nueces, TX	2015	grain sorghum	27.769908 N, -97.562039 W	2015-05-21		27	27	400
South	Nueces, TX	2015	grain sorghum	27.769908 N, -97.562039 W	2015-05-27		1345	1345	400
South	Nueces, TX	2015	grain sorghum	27.769908 N, -97.562039 W	2015-06-03		4046	4046	400
South	Nueces, TX	2015	grain sorghum	27.769908 N, -97.562039 W	2015-06-10		26464	26464	400
South	Nueces, TX	2015	grain sorghum	27.769908 N, -97.562039 W	2015-06-15		39209	39209	400
South	Nueces, TX	2015	grain sorghum	27.769908 N, -97.562039 W	2015-06-24		46419	46419	400				285									59			6						221
South	Nueces, TX	2015	grain sorghum	27.769908 N, -97.562039 W	2015-06-29		19121	19121	400				695									78			48						174
South	Nueces, TX	2015	grain sorghum	27.769908 N, -97.562039 W	2015-07-06		7535	7535	400				350									71			19						50			12
South	Nueces, TX	2015	grain sorghum	27.769908 N, -97.562039 W	2015-07-13		12016	12016	400				197									55			11						10			1
South	Nueces, TX	2015	grain sorghum	27.769908 N, -97.562039 W	2015-07-20		14825	14825	400				270									99			8						2			5
South	Nueces, TX	2015	grain sorghum	27.769908 N, -97.562039 W	2015-07-29		8129	8129	400				437									160			11						10			11
South	Nueces, TX	2015	grain sorghum	27.769908 N, -97.562039 W	2015-06-03		888	888	400
South	Nueces, TX	2015	grain sorghum	27.769908 N, -97.562039 W	2015-06-10		2740	2740	400
South	Nueces, TX	2015	grain sorghum	27.769908 N, -97.562039 W	2015-06-15		3839	3839	400
South	Nueces, TX	2015	grain sorghum	27.769908 N, -97.562039 W	2015-06-24		29816	29816	400				530									106			3						85
South	Nueces, TX	2015	grain sorghum	27.769908 N, -97.562039 W	2015-06-29		15506	15506	400				632									116			15						103
South	Nueces, TX	2015	grain sorghum	27.769908 N, -97.562039 W	2015-07-06		35928	35928	400				762									245			9						106			6
South	Nueces, TX	2015	grain sorghum	27.769908 N, -97.562039 W	2015-07-13		58461	58461	400				1416									319			4						96			11
South	Nueces, TX	2015	grain sorghum	27.769908 N, -97.562039 W	2015-07-20		71551	71551	400				2216									147			37						40			12
South	Nueces, TX	2015	grain sorghum	27.769908 N, -97.562039 W	2015-07-29		11889	11889	400				1707									82			23						13			57
South	Nueces, TX	2015	grain sorghum	27.769908 N, -97.562039 W	2015-05-21	0	1	1	160				0			0						0			0						0			0
South	Nueces, TX	2015	grain sorghum	27.769908 N, -97.562039 W	2015-05-28	8	136	144	160				0			0						0			0						0			0
South	Nueces, TX	2015	grain sorghum	27.769908 N, -97.562039 W	2015-06-02	156	1356	1512	160				2			0						2			1						0			1
South	Nueces, TX	2015	grain sorghum	27.769908 N, -97.562039 W	2015-06-10	41	3951	3992	160				60			0						13			0						12			13
South	Nueces, TX	2015	grain sorghum	27.769908 N, -97.562039 W	2015-06-16	9	737	746	160				23			0						1			1						2			3
South	Nueces, TX	2015	grain sorghum	27.769908 N, -97.562039 W	2015-06-24	49	3326	3375	160				59			0						9			0						17			9
South	Nueces, TX	2015	grain sorghum	27.769908 N, -97.562039 W	2015-06-30	2	5798	5800	160				79			0						14			3						21			11
South	Nueces, TX	2015	grain sorghum	27.769908 N, -97.562039 W	2015-07-08	21	4730	4751	160				135			4						6			2						35			7
South	Nueces, TX	2015	grain sorghum	27.769908 N, -97.562039 W	2015-07-15	15	2726	2741	160				174			42						13			1						8			6
South	Nueces, TX	2015	grain sorghum	27.769908 N, -97.562039 W	2015-07-21	0	3171	3171	160				177			3						2			1						1			2
South	Nueces, TX	2015	grain sorghum	27.769908 N, -97.562039 W	2015-07-29	0	1622	1622	160				261			0						0			1						3			11
South	Nueces, TX	2015	grain sorghum	27.769908 N, -97.562039 W	2015-08-05	1	129	130	160				32			0						0			0						1			2
South	Nueces, TX	2016	grain sorghum	27.769908 N, -97.562039 W				470187	38400	12.2445	20	2	2103	0.00447269	0.0547656	0	0	0	2103	0.00447269	0.0547656	1278	0.00271807	0.0332812	384	0.000816696	0.01	1662	0.00353476	0.0432813	419	0.000891135	0.0109115	0	0	0	2016-05-19	2016-07-26	Corpus Christi	Nueces, TX	78673	44490	87242	90.1779	50.9961	0.957108	2.68793	78.5178	2016-05-19
South	Nueces, TX	2016	grain sorghum	27.769908 N, -97.562039 W	2016-05-19		35544	35544	1920				53									40			14						8
South	Nueces, TX	2016	grain sorghum	27.769908 N, -97.562039 W	2016-05-24		73237	73237	1920				338									192			44						99
South	Nueces, TX	2016	grain sorghum	27.769908 N, -97.562039 W	2016-05-31		43960	43960	1920				920									119			78						96
South	Nueces, TX	2016	grain sorghum	27.769908 N, -97.562039 W	2016-06-06		27413	27413	1920				103									328			80						0
South	Nueces, TX	2016	grain sorghum	27.769908 N, -97.562039 W	2016-06-13		14161	14161	1920				80									380			61						0
South	Nueces, TX	2016	grain sorghum	27.769908 N, -97.562039 W	2016-06-21		13219	13219	1920				101									39			14						0
South	Nueces, TX	2016	grain sorghum	27.769908 N, -97.562039 W	2016-06-28		19440	19440	1920				0									0			16						0
South	Nueces, TX	2016	grain sorghum	27.769908 N, -97.562039 W	2016-07-05		11282	11282	1920				68									73			10						6
South	Nueces, TX	2016	grain sorghum	27.769908 N, -97.562039 W	2016-07-12		28150	28150	1920				41									37			21						10
South	Nueces, TX	2016	grain sorghum	27.769908 N, -97.562039 W	2016-07-19		56134	56134	1920				0									0			3						1
South	Nueces, TX	2016	grain sorghum	27.769908 N, -97.562039 W	2016-05-19		5923	5923	1920				0									0			9						0
South	Nueces, TX	2016	grain sorghum	27.769908 N, -97.562039 W	2016-05-31		2365	2365	1920				1									3			5						2
South	Nueces, TX	2016	grain sorghum	27.769908 N, -97.562039 W	2016-06-06		171	171	1920				6									0			6						0
South	Nueces, TX	2016	grain sorghum	27.769908 N, -97.562039 W	2016-06-13		1169	1169	1920				0									0			13						1
South	Nueces, TX	2016	grain sorghum	27.769908 N, -97.562039 W	2016-06-21		298	298	1920				0									0			3						0
South	Nueces, TX	2016	grain sorghum	27.769908 N, -97.562039 W	2016-06-29		2230	2230	1920				0									0			5						0
South	Nueces, TX	2016	grain sorghum	27.769908 N, -97.562039 W	2016-07-05		2711	2711	1920				2									46			52						4
South	Nueces, TX	2016	grain sorghum	27.769908 N, -97.562039 W	2016-07-12		5376	5376	1920				6									3			14						5
South	Nueces, TX	2016	grain sorghum	27.769908 N, -97.562039 W	2016-07-19		16798	16798	1920				73									17			98						8
South	Nueces, TX	2016	grain sorghum	27.769908 N, -97.562039 W	2016-07-26		38982	38982	1920				311									1			2						1
South	Nueces, TX	2016	grain sorghum	27.769908 N, -97.562039 W	2016-08-03		43194	43194	1920				0									0			0						0
South	Nueces, TX	2016	grain sorghum	27.769908 N, -97.562039 W	2016-08-09		28137	28137	1920				0									10			1						0
South	Nueces, TX	2016	grain sorghum	27.769908 N, -97.562039 W	2016-06-09		51	51	240				0									1			3						3			0
South	Nueces, TX	2016	grain sorghum	27.769908 N, -97.562039 W	2016-06-17		148	148	240				3									0			0						2			0
South	Nueces, TX	2016	grain sorghum	27.769908 N, -97.562039 W	2016-06-23		51	51	240				0									1			8						18			0
South	Nueces, TX	2016	grain sorghum	27.769908 N, -97.562039 W	2016-07-08		43	43	240				0									0			0						0			0
South	Nueces, TX	2017	grain sorghum	27.769908 N, -97.562039 W				83456	14400	5.79556	9	1	2479	0.0297043	0.172153	129	0.00154572	0.00895833	2608	0.03125	0.181111	286	0.00342696	0.0198611	78	0.000934624	0.00541667	364	0.00436158	0.0252778	51	0.0006111	0.00354167	32	0.000383436	0.00222222	2017-05-25	2017-07-20	Corpus Christi	Nueces, TX	78796	35296	87242	90.3189	40.4576	0.841338	2.5286	78.5151	2017-05-25
South	Nueces, TX	2017	grain sorghum	27.769908 N, -97.562039 W	2017-05-25	1930	1689	3619	1600				169			16						0			15						2			0
South	Nueces, TX	2017	grain sorghum	27.769908 N, -97.562039 W	2017-06-01	1132	1585	2717	1600				99			12						23			36						9			5
South	Nueces, TX	2017	grain sorghum	27.769908 N, -97.562039 W	2017-06-08	133	323	456	1600				92			9						6			2						12			8
South	Nueces, TX	2017	grain sorghum	27.769908 N, -97.562039 W	2017-06-15	59	172	231	1600				20			1						1			2						22			5
South	Nueces, TX	2017	grain sorghum	27.769908 N, -97.562039 W	2017-06-22	52	455	507	1600				12			0						2			5						1			0
South	Nueces, TX	2017	grain sorghum	27.769908 N, -97.562039 W	2017-06-29	24	1762	1786	1600				26			0						1			4						0			0
South	Nueces, TX	2017	grain sorghum	27.769908 N, -97.562039 W	2017-07-06	62	5325	5387	1600				156			2						19			1						1			0
South	Nueces, TX	2017	grain sorghum	27.769908 N, -97.562039 W	2017-07-14	172	22245	22417	1600				264			67						27			2						1			1
South	Nueces, TX	2017	grain sorghum	27.769908 N, -97.562039 W	2017-07-20	385	45951	46336	1600				1641			22						207			11						3			13
South	Nueces, TX	2018	grain sorghum	27.769908 N, -97.562039 W				172431	5760	29.9359	3	1	3887	0.0225424	0.674826	15	8.69913e-05	0.00260417	3902	0.0226293	0.677431	452	0.00262134	0.0784722	38	0.000220378	0.00659722	490	0.00284172	0.0850694	35	0.00020298	0.00607639	42	0.000243576	0.00729167	2018-06-14	2018-07-12	Corpus Christi	Nueces, TX	79190	37629	87242	90.7705	43.1317	0.632723	2.17327	78.5151	2018-06-14
South	Nueces, TX	2018	grain sorghum	27.769908 N, -97.562039 W	2018-06-14	4	649	653	1920				74			3						0			78						1			0
South	Nueces, TX	2018	grain sorghum	27.769908 N, -97.562039 W	2018-06-28	79	14886	14965	1920				214			2						27			2						4			6
South	Nueces, TX	2018	grain sorghum	27.769908 N, -97.562039 W	2018-07-12	1504	155309	156813	1920				3599			10						446			36						31			36
South	Nueces, TX	2019	grain sorghum	27.769908 N, -97.562039 W				24753	2880	8.59479	9	1	3174	0.128227	1.10208	87	0.00351473	0.0302083	3261	0.131742	1.13229	5	0.000201996	0.00173611	30	0.00121197	0.0104167	35	0.00141397	0.0121528	11	0.000444391	0.00381944	6	0.000242395	0.00208333	2019-06-03	2019-08-01	Corpus Christi	Nueces, TX	76372	38461	87242	87.5404	44.0854	1.73196	2.38073	78.5178	2019-06-03
South	Nueces, TX	2019	grain sorghum	27.769908 N, -97.562039 W	2019-06-03	2030	5492	7522	320				455			43						1			6						0			0
South	Nueces, TX	2019	grain sorghum	27.769908 N, -97.562039 W	2019-06-10	78	747	825	320				812			32						3			23						8			6
South	Nueces, TX	2019	grain sorghum	27.769908 N, -97.562039 W	2019-06-17	2	8	10	320				365			5						0			2						0			0
South	Nueces, TX	2019	grain sorghum	27.769908 N, -97.562039 W	2019-06-24	3	8	11	320				209			0						0			0						0			0
South	Nueces, TX	2019	grain sorghum	27.769908 N, -97.562039 W	2019-07-02	33	185	218	320				59			1						0			1						0			0
South	Nueces, TX	2019	grain sorghum	27.769908 N, -97.562039 W	2019-07-11	48	324	372	320				32			2						0			0						0			0
South	Nueces, TX	2019	grain sorghum	27.769908 N, -97.562039 W	2019-07-16	3	2258	2261	320				856			0						0			0						0			0
South	Nueces, TX	2019	grain sorghum	27.769908 N, -97.562039 W	2019-07-26	0	3477	3477	320				189			4						0			4						0			0
South	Nueces, TX	2019	grain sorghum	27.769908 N, -97.562039 W	2019-08-01	17	10040	10057	320				197			0						0			0						3			0
South	Jim Wells, TX	2017	grain sorghum	27.803905N, 97.916888W				4038	5016	0.805024	14	7	1100	0.272412	0.219298	112	0.0277365	0.0223285	1212	0.300149	0.241627	26	0.00643883	0.00518341	14	0.00346706	0.00279107	40	0.00990589	0.00797448	37	0.00916295	0.0073764	14	0.00346706	0.00279107	2017-04-25	2017-05-02	Agua Dulce	Jim Wells, TX	66520	26059	87239	76.2503	29.8708	7.42558	11.1854	78.5151	2017-04-25
South	Jim Wells, TX	2017	grain sorghum	27.803905N, 97.916888W	2017-05-09	7	119	126	138				0			0						0			1						0			0
South	Jim Wells, TX	2017	grain sorghum	27.803905N, 97.916888W	2017-05-16	21	150	171	120				24			1						0			0						0			2
South	Jim Wells, TX	2017	grain sorghum	27.803905N, 97.916888W	2017-05-23	23	145	168	120				75			5						0			2						1			8
South	Jim Wells, TX	2017	grain sorghum	27.803905N, 97.916888W	2017-05-31	4	26	30	114				54			0						0			1						2			0
South	Jim Wells, TX	2017	grain sorghum	27.803905N, 97.916888W	2017-06-06	1	3	4	120				72			3						0			0						0			0
South	Jim Wells, TX	2017	grain sorghum	27.803905N, 97.916888W	2017-06-14	9	5	14	120				23			1						0			0						0			0
South	Jim Wells, TX	2017	grain sorghum	27.803905N, 97.916888W	2017-06-27	0	0	0	132				0			0						0			0						0			0
South	Jim Wells, TX	2017	grain sorghum	27.803905N, 97.916888W	2017-05-09	0	2	2	120				0			0						0			1						0			0
South	Jim Wells, TX	2017	grain sorghum	27.803905N, 97.916888W	2017-05-16	5	42	47	120				0			1						0			1						0			0
South	Jim Wells, TX	2017	grain sorghum	27.803905N, 97.916888W	2017-05-23	27	70	97	120				13			0						0			1						2			4
South	Jim Wells, TX	2017	grain sorghum	27.803905N, 97.916888W	2017-05-31	4	28	32	120				2			9						0			1						2			0
South	Jim Wells, TX	2017	grain sorghum	27.803905N, 97.916888W	2017-06-06	1	13	14	120				20			0						0			0						0			0
South	Jim Wells, TX	2017	grain sorghum	27.803905N, 97.916888W	2017-06-14	4	136	140	120				21			3						1			0						0			0
South	Jim Wells, TX	2017	grain sorghum	27.803905N, 97.916888W	2017-06-27	0	195	195	120				25			3						0			0						0			4
South	Jim Wells, TX	2017	grain sorghum	27.803905N, 97.916888W	2017-05-09	13	87	100	120				0			0						0			0						0			0
South	Jim Wells, TX	2017	grain sorghum	27.803905N, 97.916888W	2017-05-16	63	288	351	120				5			1						1			4						0			0
South	Jim Wells, TX	2017	grain sorghum	27.803905N, 97.916888W	2017-05-23	18	200	218	120				83			4						1			0						2			0
South	Jim Wells, TX	2017	grain sorghum	27.803905N, 97.916888W	2017-05-31	10	23	33	132				46			6						0			1						2			0
South	Jim Wells, TX	2017	grain sorghum	27.803905N, 97.916888W	2017-06-06	0	4	4	120				42			6						0			0						0			0
South	Jim Wells, TX	2017	grain sorghum	27.803905N, 97.916888W	2017-06-14	3	9	12	120				33			1						0			0						0			0
South	Jim Wells, TX	2017	grain sorghum	27.803905N, 97.916888W	2017-06-27	0	17	17	120				27			0						0			0						0			0
South	Jim Wells, TX	2017	grain sorghum	27.803905N, 97.916888W	2017-05-09	39	240	279	132				0			0						2			1						1			1
South	Jim Wells, TX	2017	grain sorghum	27.803905N, 97.916888W	2017-05-16	59	541	600	120				19			4						4			2						0			1
South	Jim Wells, TX	2017	grain sorghum	27.803905N, 97.916888W	2017-05-23	20	352	372	120				88			8						4			1						2			13
South	Jim Wells, TX	2017	grain sorghum	27.803905N, 97.916888W	2017-05-31	5	77	82	120				79			3						1			0						0			0
South	Jim Wells, TX	2017	grain sorghum	27.803905N, 97.916888W	2017-06-06	0	12	12	120				53			4						0			0						0			0
South	Jim Wells, TX	2017	grain sorghum	27.803905N, 97.916888W	2017-06-14	3	72	75	120				70			13						0			0						0			0
South	Jim Wells, TX	2017	grain sorghum	27.803905N, 97.916888W	2017-06-27	0	81	81	120				35			9						0			0						0			0
South	Jim Wells, TX	2017	grain sorghum	27.803905N, 97.916888W	2017-05-09	2	16	18	126				0			0						0			1						0			0
South	Jim Wells, TX	2017	grain sorghum	27.803905N, 97.916888W	2017-05-16	8	210	218	120				3			1						0			2						0			2
South	Jim Wells, TX	2017	grain sorghum	27.803905N, 97.916888W	2017-05-23	17	238	255	120				33			4						0			4						0			0
South	Jim Wells, TX	2017	grain sorghum	27.803905N, 97.916888W	2017-06-06	0	5	5	120				26			17						0			0						0			0
South	Jim Wells, TX	2017	grain sorghum	27.803905N, 97.916888W	2017-06-14	2	3	5	120				27			0						0			0						0			0
South	Jim Wells, TX	2017	grain sorghum	27.803905N, 97.916888W	2017-06-27	0	7	7	120				17			2						0			0						0			0
South	Jim Wells, TX	2017	grain sorghum	27.803905N, 97.916888W	2017-05-09	2	5	7	156				0			0						0			0						0			0
South	Jim Wells, TX	2017	grain sorghum	27.803905N, 97.916888W	2017-05-16	14	71	85	120				8			0						0			0						0			2
South	Jim Wells, TX	2017	grain sorghum	27.803905N, 97.916888W	2017-05-23	14	95	109	126				10			1						0			2						0			0
South	Jim Wells, TX	2017	grain sorghum	27.803905N, 97.916888W	2017-05-31	1	21	22	120				11			0						0			0						0			0
South	Jim Wells, TX	2017	grain sorghum	27.803905N, 97.916888W	2017-06-06	2	10	12	120				12			1						0			0						0			0
South	Jim Wells, TX	2017	grain sorghum	27.803905N, 97.916888W	2017-06-14	3	4	7	120				12			1						0			0						0			0
South	Jim Wells, TX	2017	grain sorghum	27.803905N, 97.916888W	2017-06-27	1	11	12	120				9			0						0			0						0			0
South	Jim Wells, TX	2018	grain sorghum	27.803905N, 97.916888W				318	1200	0.265	10	7	256	0.805031	0.213333	2	0.00628931	0.00166667	258	0.811321	0.215	1	0.00314465	0.000833333	0	0	0	1	0.00314465	0.000833333	4	0.0125786	0.00333333	1	0.00314465	0.000833333	2018-05-17	2018-05-31	Agua Dulce	Jim Wells, TX	67070	30853	87239	76.8808	35.3661	6.65528	10.5721	78.5151	2018-05-17
South	Jim Wells, TX	2018	grain sorghum	27.803905N, 97.916888W	2018-05-17	0	2	2	120				9			0						0			0						0			0
South	Jim Wells, TX	2018	grain sorghum	27.803905N, 97.916888W	2018-05-24	0	2	2	120				19			0						0			0						0			0
South	Jim Wells, TX	2018	grain sorghum	27.803905N, 97.916888W	2018-05-24	2	5	7	120				31			0						0			0						1			0
South	Jim Wells, TX	2018	grain sorghum	27.803905N, 97.916888W	2018-05-17	10	7	17	120				36			0						1			0						0			1
South	Jim Wells, TX	2018	grain sorghum	27.803905N, 97.916888W	2018-05-24	1	24	25	120				9			0						0			0						1			0
South	Jim Wells, TX	2018	grain sorghum	27.803905N, 97.916888W	2018-05-31	1	9	10	120				14			0						0			0						0			0
South	Jim Wells, TX	2018	grain sorghum	27.803905N, 97.916888W	2018-05-17	79	69	148	120				66			0						0			0						1			0
South	Jim Wells, TX	2018	grain sorghum	27.803905N, 97.916888W	2018-05-24	2	85	87	120				42			0						0			0						0			0
South	Jim Wells, TX	2018	grain sorghum	27.803905N, 97.916888W	2018-05-31	0	0	0	120				19			2						0			0						0			0
South	Jim Wells, TX	2018	grain sorghum	27.803905N, 97.916888W	2018-05-17	2	15	17	120				12			0						0			0						1			0
South	Jim Wells, TX	2019	grain sorghum	27.803905N, 97.916888W				232	1068	0.217228	9	4	220	0.948276	0.205993	0	0	0	220	0.948276	0.205993	4	0.0172414	0.00374532	2	0.00862069	0.00187266	6	0.0258621	0.00561798	0	0	0	1	0.00431034	0.00093633	2019-05-28	2019-06-13	Agua Dulce	Jim Wells, TX	65245	17816	87239	74.7888	20.4221	8.9593	10.5629	78.5151	2019-05-28
South	Jim Wells, TX	2019	grain sorghum	27.803905N, 97.916888W	2019-05-28	1	73	74	120				65			0						0			1						0			0
South	Jim Wells, TX	2019	grain sorghum	27.803905N, 97.916888W	2019-06-06	1	24	25	120				19			0						0			0						0			0
South	Jim Wells, TX	2019	grain sorghum	27.803905N, 97.916888W	2019-06-13	0	2	2	120				6			0						1			0						0			0
South	Jim Wells, TX	2019	grain sorghum	27.803905N, 97.916888W	2019-05-28	20	36	56	120				27			0						0			1						0			0
South	Jim Wells, TX	2019	grain sorghum	27.803905N, 97.916888W	2019-06-06	1	2	3	120				3			0						1			0						0			1
South	Jim Wells, TX	2019	grain sorghum	27.803905N, 97.916888W	2019-05-28	3	14	17	120				29			0						0			0						0			0
South	Jim Wells, TX	2019	grain sorghum	27.803905N, 97.916888W	2019-06-06	2	1	3	120				20			0						2			0						0			0
South	Jim Wells, TX	2019	grain sorghum	27.803905N, 97.916888W	2019-05-28	6	28	34	120				18			0						0			0						0			0
South	Jim Wells, TX	2019	grain sorghum	27.803905N, 97.916888W	2019-06-06	2	16	18	120				33			0						0			0						0			0
South	Fort Bend, TX	2016	grain sorghum	29.558962N, 95.807364W				447843	13440	33.3217	5	1	20	4.46585e-05	0.0014881	0	0	0	20	4.46585e-05	0.0014881	18	4.01927e-05	0.00133929	40	8.9317e-05	0.00297619	38	8.48512e-05	0.00282738	60	0.000133976	0.00446429	0	0	0	2016-05-27	2016-07-19	Rosenburg	Fort Bend, TX	13630	4945	87245	15.6227	5.66795	25.4043	2.33251	78.5205	2016-05-27
South	Fort Bend, TX	2016	grain sorghum	29.558962N, 95.807364W	2016-05-27		8449	8449	1920	4.40052			0	0	0							0	0	0	10	0.00118357	0.00520833				0	0	0
South	Fort Bend, TX	2016	grain sorghum	29.558962N, 95.807364W	2016-06-03		85923	85923	1920	44.7516			0	0	0							0	0	0	0	0	0				0	0	0
South	Fort Bend, TX	2016	grain sorghum	29.558962N, 95.807364W	2016-06-08		288318	288318	1920	150.166			0	0	0							0	0	0	0	0	0				1	3.46839e-06	0.000520833
South	Fort Bend, TX	2016	grain sorghum	29.558962N, 95.807364W	2016-06-14		63029	63029	1920	32.8276			0	0	0							16	0.000253851	0.00833333	8	0.000126926	0.00416667				57	0.000904346	0.0296875
South	Fort Bend, TX	2016	grain sorghum	29.558962N, 95.807364W	2016-06-22		683	683	1920	0.355729			0	0	0							2	0.00292826	0.00104167	2	0.00292826	0.00104167				2	0.00292826	0.00104167
South	Fort Bend, TX	2016	grain sorghum	29.558962N, 95.807364W	2016-06-30		1240	1240	1920	0.645833			1	0.000806452	0.000520833							0	0	0	1	0.000806452	0.000520833				0	0	0
South	Fort Bend, TX	2016	grain sorghum	29.558962N, 95.807364W	2016-07-19		188	188	1920	0.0979167			19	0.101064	0.00989583							0	0	0	19	0.101064	0.00989583				0	0	0
South	Fort Bend, TX	2017	grain sorghum	29.558962N, 95.807364W				77952	15360	5.075	4	1	35	0.000448994	0.00227865	36	0.000461823	0.00234375	71	0.000910817	0.0046224	68	0.000872332	0.00442708	31	0.000397681	0.00201823	99	0.00127001	0.00644531	103	0.00132133	0.00670573	21	0.000269397	0.00136719	2017-05-23	2017-06-27	Rosenburg	Fort Bend, TX	14090	2138	87245	16.1499	2.45057	25.8192	1.76629	78.5205	2017-05-23
South	Fort Bend, TX	2017	grain sorghum	29.558962N, 95.807364W	2017-05-08	249	28	277	1920	0.144271			0	0	0	0						0	0	0	0	0	0				0	0	0	0
South	Fort Bend, TX	2017	grain sorghum	29.558962N, 95.807364W	2017-05-18	91	1220	1311	1920	0.682813			3	0.00228833	0.0015625	0						6	0.00457666	0.003125	16	0.0122044	0.00833333				0	0	0	0
South	Fort Bend, TX	2017	grain sorghum	29.558962N, 95.807364W	2017-05-23	542	3124	3666	1920	1.90938			32	0.00872886	0.0166667	0						21	0.00572831	0.0109375	13	0.0035461	0.00677083				0	0	0	0
South	Fort Bend, TX	2017	grain sorghum	29.558962N, 95.807364W	2017-06-01	1461	14559	16020	1920	8.34375			2	0.000124844	0.00104167	0						54	0.00337079	0.028125	4	0.000249688	0.00208333				8	0.000499376	0.00416667	0
South	Fort Bend, TX	2017	grain sorghum	29.558962N, 95.807364W	2017-06-07	257	8707	8964	1920	4.66875			0	0	0	36						15	0.00167336	0.0078125	3	0.000334672	0.0015625				88	0.00981705	0.0458333	2
South	Fort Bend, TX	2017	grain sorghum	29.558962N, 95.807364W	2017-06-15	1351	36571	37922	1920	19.751			10	0.000263699	0.00520833	0						23	0.000606508	0.0119792	19	0.000501028	0.00989583				11	0.000290069	0.00572917	13
South	Fort Bend, TX	2017	grain sorghum	29.558962N, 95.807364W	2017-06-20	472	6500	6972	1920	3.63125			0	0	0	0						36	0.00516351	0.01875	10	0.00143431	0.00520833				18	0.00258176	0.009375	20
South	Fort Bend, TX	2017	grain sorghum	29.558962N, 95.807364W	2017-06-27	54	1136	1190	1920	0.619792			3	0.00252101	0.0015625	0						2	0.00168067	0.00104167	7	0.00588235	0.00364583				2	0.00168067	0.00104167	0
South	Fort Bend, TX	2018	grain sorghum	29.558962N, 95.807364W				340187	10240	33.2214	12	2	12519	0.0368003	1.22256	0	0	0	12519	0.0368003	1.22256	887	0.00260739	0.0866211	35	0.000102885	0.00341797	922	0.00271027	0.0900391	171	0.000502665	0.0166992	42	0.000123462	0.00410156	2018-05-23	2018-07-10	Rosenburg	Fort Bend, TX	16397	4718	87245	18.7942	5.40776	23.5521	2.36231	78.5205	2018-05-23
South	Fort Bend, TX	2018	grain sorghum	29.558962N, 95.807364W	2018-05-23	17	234	251	1280	0.196094			18		0.0140625	0						2	0.00796813	0.0015625	2	0.00796813	0.0015625				0	0	0	0
South	Fort Bend, TX	2018	grain sorghum	29.558962N, 95.807364W	2018-05-31	535	3180	3715	1280	2.90234			46		0.0359375	0						19	0.0051144	0.0148437	4	0.00107672	0.003125				2	0.000538358	0.0015625	3
South	Fort Bend, TX	2018	grain sorghum	29.558962N, 95.807364W	2018-06-06	575	6777	7352	1280	5.74375			33		0.0257812	0						27	0.00367247	0.0210938	1	0.000136017	0.00078125				1	0.000136017	0.00078125	1
South	Fort Bend, TX	2018	grain sorghum	29.558962N, 95.807364W	2018-06-12	2664	6870	9534	1280	7.44844			142		0.110937	0						26	0.00272708	0.0203125	0	0	0				11	0.00115377	0.00859375	3
South	Fort Bend, TX	2018	grain sorghum	29.558962N, 95.807364W	2018-06-19	13147	79720	92867	1280	72.5523			1226		0.957812	0						24	0.000258434	0.01875	0	0	0				4	4.30724e-05	0.003125	14
South	Fort Bend, TX	2018	grain sorghum	29.558962N, 95.807364W	2018-06-26	5089	54360	59449	1280	46.4445			1490		1.16406	0						343	0.00576965	0.267969	0	0	0				15	0.000252317	0.0117188	1
South	Fort Bend, TX	2018	grain sorghum	29.558962N, 95.807364W	2018-07-03	135	2862	2997	1280	2.34141			866		0.676562	0						4	0.00133467	0.003125	11	0.00367034	0.00859375				0	0	0	0
South	Fort Bend, TX	2018	grain sorghum	29.558962N, 95.807364W	2018-07-26	5	72	77	1280	0.0601563			898		0.701562	0						3	0.038961	0.00234375	5	0.0649351	0.00390625				0	0	0	0
South	Fort Bend, TX	2018	grain sorghum	29.558962N, 95.807364W	2018-06-11	2463	35530	37993	1920	19.788			898		0.467708	0						165		0.0859375	1	2.63206e-05	0.000520833				87	0.0022899	0.0453125	18
South	Fort Bend, TX	2018	grain sorghum	29.558962N, 95.807364W	2018-06-26	3361	113730	117091	1920	60.9849			4273		2.22552	0						212		0.110417	6	5.12422e-05	0.003125				49	0.000418478	0.0255208	2
South	Fort Bend, TX	2018	grain sorghum	29.558962N, 95.807364W	2018-07-02	242	8260	8502	1920	4.42812			1671		0.870313	0						48		0.025	1	0.000117619	0.000520833				1	0.000117619	0.000520833	0
South	Fort Bend, TX	2018	grain sorghum	29.558962N, 95.807364W	2018-07-09	41	318	359	1920	0.186979			958		0.498958	0						13		0.00677083	2	0.00557103	0.00104167				1	0.00278552	0.000520833	0
South GP	Burleson, TX	2015	grain sorghum	30.523613 N, -96.401023 W				209685	1120	187.219	7	1	1128	0.0053795	1.00714	2	9.53812e-06	0.00178571	1130	0.00538904	1.00893	1108	0.00528412	0.989286	200	0.000953812	0.178571	1308	0.00623793	1.16786	239	0.0011398	0.213393	161	0.000767818	0.14375	2015-08-13	2015-10-17	College Station	Burleson, TX	42047	5359	87251	48.1909	6.14205	23.2089	3.73062	78.5259	2015-08-13
South GP	Burleson, TX	2015	grain sorghum	30.523613 N, -96.401023 W	2015-09-12	1040	28830	29870	160	186.688			129		0.80625	0						20		0.125	0	0	0				0	0	0	0
South GP	Burleson, TX	2015	grain sorghum	30.523613 N, -96.401023 W	2015-09-21	0	63047	63047	160	394.044			336		2.1	0						238		1.4875	11	0.000174473	0.06875				98	0.0015544	0.6125	36
South GP	Burleson, TX	2015	grain sorghum	30.523613 N, -96.401023 W	2015-09-27	87	64628	64715	160	404.469			493		3.08125	0						243		1.51875	32	0.000494476	0.2				78	0.00120528	0.4875	73
South GP	Burleson, TX	2015	grain sorghum	30.523613 N, -96.401023 W	2015-10-03	3	18509	18512	160	115.7			132		0.825	2						208		1.3	78	0.00421348	0.4875				52	0.00280899	0.325	15
South GP	Burleson, TX	2015	grain sorghum	30.523613 N, -96.401023 W	2015-10-10	6	2980	2986	160	18.6625			23		0.14375	0						32		0.2	48	0.016075	0.3				6	0.00200938	0.0375	3
South GP	Burleson, TX	2015	grain sorghum	30.523613 N, -96.401023 W	2015-10-17	15	1570	1585	160	9.90625			10		0.0625	0						2		0.0125	23	0.014511	0.14375				3	0.00189274	0.01875	1
South GP	Burleson, TX	2016	grain sorghum	30.523613 N, -96.401023 W				227286	4000	56.8215	10	1	1161	0.0051081	0.29025	0	0	0	1161	0.0051081	0.29025	256	0.00112633	0.064	36	0.000158391	0.009	292	0.00128472	0.073	55	0.000241986	0.01375	55	0.000241986	0.01375	2016-06-12	2016-09-18	College Station	Burleson, TX	44778	7394	87251	51.3209	8.4744	24.7298	2.49739	78.5259	2016-06-12
South GP	Burleson, TX	2016	grain sorghum	30.523613 N, -96.401023 W	2016-06-12		190	190	400	0.475			0		0	0						4		0.01	2	0.0105263	0.005				0	0	0	0
South GP	Burleson, TX	2016	grain sorghum	30.523613 N, -96.401023 W	2016-06-20		79	79	400	0.1975			0		0	0						0		0	0	0	0				3	0.0379747	0.0075	0
South GP	Burleson, TX	2016	grain sorghum	30.523613 N, -96.401023 W	2016-06-25		61	61	400	0.1525			0		0	0						0		0	1	0.0163934	0.0025				25	0.409836	0.0625	0
South GP	Burleson, TX	2016	grain sorghum	30.523613 N, -96.401023 W	2016-07-06		104	104	400	0.26			6		0.015	0						0		0	0	0	0				6	0.0576923	0.015	1
South GP	Burleson, TX	2016	grain sorghum	30.523613 N, -96.401023 W	2016-07-13		132	132	400	0.33			3		0.0075	0						0		0	1	0.00757576	0.0025				0	0	0	3
South GP	Burleson, TX	2016	grain sorghum	30.523613 N, -96.401023 W	2016-07-22		217	217	400	0.5425			3		0.0075	0						0		0	1	0.00460829	0.0025				0	0	0	7
South GP	Burleson, TX	2016	grain sorghum	30.523613 N, -96.401023 W	2016-07-28		1740	1740	400	4.35			14		0.035	0						0		0	2	0.00114943	0.005				0	0	0	3
South GP	Burleson, TX	2016	grain sorghum	30.523613 N, -96.401023 W	2016-08-05		11438	11438	400	28.595			195		0.4875	0						12		0.03	5	0.000437139	0.0125				2	0.000174856	0.005	21
South GP	Burleson, TX	2016	grain sorghum	30.523613 N, -96.401023 W	2016-08-19		211829	211829	400	529.572			937		2.3425	0						239		0.5975	22	0.000103857	0.055				19	8.9695e-05	0.0475	16
South GP	Burleson, TX	2016	grain sorghum	30.523613 N, -96.401023 W	2016-09-11		1496	1496	400	3.74			3		0.0075	0						1		0.0025	2	0.0013369	0.005				0	0	0	0
South GP	Cooke, TX	2016	grain sorghum	33.639398N, 97.147577W				488549	19200	25.4453	10	1	916	0.00187494	0.0477083	0	0	0	916	0.00187494	0.0477083	148	0.000302938	0.00770833	212	0.000433938	0.0110417	360	0.000736876	0.01875	29	5.93595e-05	0.00151042	0	0	0	2016-06-12	2016-08-14	Gainesville	Cooke, TX	10160	1531	87245	11.6454	1.75483	49.7667	0.00573099	78.5205	6_12_2016
South GP	Cooke, TX	2016	grain sorghum	33.639398N, 97.147577W	2016-06-12		3206	3206	1920	1.66979			8	0.00249532	0.00416667							14	0.00436681	0.00729167	15	0.00467873	0.0078125				0	0	0
South GP	Cooke, TX	2016	grain sorghum	33.639398N, 97.147577W	2016-06-19		1989	1989	1920				0	0	0							3	0.0015083	0.0015625	12	0.00603318	0.00625				0	0	0
South GP	Cooke, TX	2016	grain sorghum	33.639398N, 97.147577W	2016-06-26		2351	2351	1920				8	0.00340281	0.00416667							0	0	0	1	0.000425351	0.000520833				0	0	0
South GP	Cooke, TX	2016	grain sorghum	33.639398N, 97.147577W	2016-07-03		3169	3169	1920				49	0.0154623	0.0255208							0	0	0	1	0.000315557	0.000520833				0	0	0
South GP	Cooke, TX	2016	grain sorghum	33.639398N, 97.147577W	2016-07-10		9687	9687	1920				22	0.00227108	0.0114583							0	0	0	0	0	0				0	0	0
South GP	Cooke, TX	2016	grain sorghum	33.639398N, 97.147577W	2016-07-18		71187	71187	1920				132	0.00185427	0.06875							37	0.000519758	0.0192708	15	0.000210713	0.0078125				0	0	0
South GP	Cooke, TX	2016	grain sorghum	33.639398N, 97.147577W	2016-07-22		185335	185335	1920				247	0.00133272	0.128646							28	0.000151078	0.0145833	76	0.000410068	0.0395833				3	1.61869e-05	0.0015625
South GP	Cooke, TX	2016	grain sorghum	33.639398N, 97.147577W	2016-07-31		188564	188564	1920				243	0.00128869	0.126562							53	0.000281072	0.0276042	27	0.000143187	0.0140625				4	2.1213e-05	0.00208333
South GP	Cooke, TX	2016	grain sorghum	33.639398N, 97.147577W	2016-08-08		23028	23028	1920				223	0.00968386	0.116146							13	0.00056453	0.00677083	64	0.00277923	0.0333333				0	0	0
South GP	Cooke, TX	2016	grain sorghum	33.639398N, 97.147577W	2016-08-14		33	33	1920				11	0.333333	0.00572917							0	0	0	0	0	0				0	0	0
South GP	Cooke, TX	2017	grain sorghum	33.639398N, 97.147577W				183542	8400	21.8502	5	1	2959	0.0161217	0.352262	0	0	0	2959	0.0161217	0.352262	1627	0.00886446	0.19369	160	0.000871735	0.0190476	1787	0.00973619	0.212738	107	0.000582973	0.0127381	195	0.00106243	0.0232143	2017-06-29	2017-08-19	Gainesville	Cooke, TX	10798	1030	87245	12.3766	1.18058	50.0384	0.0492865	78.5205	6_29_2017
South GP	Cooke, TX	2017	grain sorghum	33.639398N, 97.147577W	2017-06-29	210	11470	11680	1680				2	0.000171233	0.00119048	0						1	8.56164e-05	0.000595238	0	0	0				0	0		0
South GP	Cooke, TX	2017	grain sorghum	33.639398N, 97.147577W	2017-07-14	924	43923	44847	1680				36	0.000802729	0.0214286	0						162	0.00361228	0.0964286	38	0.000847325	0.022619				65	0.00144937		0
South GP	Cooke, TX	2017	grain sorghum	33.639398N, 97.147577W	2017-07-24	1100	42726	43826	1680				367	0.00837402	0.218452	0						199	0.00454068	0.118452	32	0.00073016	0.0190476				26	0.000593255		1
South GP	Cooke, TX	2017	grain sorghum	33.639398N, 97.147577W	2017-08-04	7770	65271	73041	1680				2393	0.0327624	1.4244	0						1193	0.0163333	0.710119	50	0.000684547	0.0297619				13	0.000177982		193
South GP	Cooke, TX	2017	grain sorghum	33.639398N, 97.147577W	2017-08-19	6260	3788	10048	1680				161	0.0160231	0.0958333	0						72	0.00716561	0.0428571	40	0.00398089	0.0238095				3	0.000298567		1
South GP	Cooke, TX	2018	grain sorghum	33.639398N, 97.147577W				24960	3840	6.5	2	1	620	0.0248397	0.161458	0	0	0	620	0.0248397	0.161458	61	0.00244391	0.0158854	123	0.00492788	0.0320312	62	0.00248397	0.0161458	1	4.00641e-05	0.000260417	24	0.000961538	0.00625	2018-07-02	2018-07-22	Gainesville	Cooke, TX	12225	1704	87245	14.0123	1.95312	48.1793	0.2109	78.5205	2018-07-02
South GP	Cooke, TX	2018	grain sorghum	33.639398N, 97.147577W	2018-07-02	340	16067	16407	1920				57	0.00347413	0.0296875	0						44	0.00268178	0.0229167	122	0.00743585	0.0635417				0	0	0	21
South GP	Cooke, TX	2018	grain sorghum	33.639398N, 97.147577W	2018-07-22	77	8836	8913	1920				563			0						17			1						1			3
North GP	Garfield, OK	2017	grain sorghum	36.21422N, 98.01362W				5567	4752	1.17151	17	7	2	0.00035926	0.000420875	0	0	0	2	0.00035926	0.000420875	10	0.0017963	0.00210438	4	0.00071852	0.000841751	14	0.00251482	0.00294613	6	0.00107778	0.00126263	3	0.00053889	0.000631313	2017-06-02	2017-10-03	ncok	Garfield, OK	55301	2173	87239	63.3902	2.49086	25.9563	0	78.5151	2017-06-02
North GP	Garfield, OK	2017	grain sorghum	36.21422N, 98.01362W	2017-06-02	0	0	0	108				0			0						0			0						0			0
North GP	Garfield, OK	2017	grain sorghum	36.21422N, 98.01362W	2017-06-09	0	0	0	108				0			0						0			0						0			0
North GP	Garfield, OK	2017	grain sorghum	36.21422N, 98.01362W	2017-06-15	0	0	0	108				0			0						0			0						0			0
North GP	Garfield, OK	2017	grain sorghum	36.21422N, 98.01362W	2017-06-21	0	0	0	108				0			0						0			0						0			0
North GP	Garfield, OK	2017	grain sorghum	36.21754N, -97.97529W	6/9/2017	0	0	0	108				0			0						0			0						0			1.08
North GP	Garfield, OK	2017	grain sorghum	36.21754N, -97.97529W	6/15/2017	0	0	0	108				0			0						0			0						0			0
North GP	Garfield, OK	2017	grain sorghum	36.21754N, -97.97529W	6/21/2017	0	0	0	108				0			0						0			0						0			0
North GP	Garfield, OK	2017	grain sorghum	36.21917N, -98.01261W	8/31/2017	0	63.72	63.72	108				0			0						0			0						0			0
North GP	Garfield, OK	2017	grain sorghum	36.21917N, -98.01261W	9/7/2017	52.92	307.8	360.72	108				0			0						0			0						1.08			0
North GP	Garfield, OK	2017	grain sorghum	36.21917N, -98.01261W	9/12/2017	49.68	449.28	498.96	108				0			0						0			0						0			0
North GP	Garfield, OK	2017	grain sorghum	36.21917N, -98.01261W	9/19/2017	6.48	22.68	29.16	108				1.08			0						0			0						0			0
North GP	Garfield, OK	2017	grain sorghum	36.21917N, -98.01261W	10/3/2017	4.32	17.28	21.6	108				0			0						0			0						1.08			0
North GP	Garfield, OK	2017	grain sorghum	36.23008N, -98.00225W	6/2/2017	0	0	0	108				0			0						0			0						0			0
North GP	Garfield, OK	2017	grain sorghum	36.23008N, -98.00225W	6/9/2017	0	0	0	108				0			0						0			0						0			0
North GP	Garfield, OK	2017	grain sorghum	36.23008N, -98.00225W	6/15/2017	0	0	0	108				1.08			0						0			0						0			0
North GP	Garfield, OK	2017	grain sorghum	36.23008N, -98.00225W	6/21/2017	0	0	0	108				0			0						0			1.08						0			0
North GP	Garfield, OK	2017	grain sorghum	36.23332N, -98.03613W	6/2/2017	0	0	0	108				0			0						0			0						0			0
North GP	Garfield, OK	2017	grain sorghum	36.23332N, -98.03613W	6/9/2017	0	0	0	108				0			0						0			0						0			0
North GP	Garfield, OK	2017	grain sorghum	36.23332N, -98.03613W	6/15/2017	0	0	0	108				0			0						0			0						0			0
North GP	Garfield, OK	2017	grain sorghum	36.23332N, -98.03613W	6/21/2017	0	0	0	108				0			0						0			0						0			0
North GP	Garfield, OK	2017	grain sorghum	36.23332N, -98.03613W	6/28/2017	0	0	0	108				0			0						0			0						0			0
North GP	Garfield, OK	2017	grain sorghum	36.23332N, -98.03613W	7/10/2017	0	6.48	6.48	108				0			0						0			0						0			0
North GP	Garfield, OK	2017	grain sorghum	36.23332N, -98.03613W	7/18/2017	1.08	1.08	2.16	108				0			0						0			0						0			0
North GP	Garfield, OK	2017	grain sorghum	36.23332N, -98.03613W	7/25/2017	0	0	0	108				0			0						0			0						0			0
North GP	Garfield, OK	2017	grain sorghum	36.23332N, -98.03613W	8/3/2017	0	20.52	20.52	108				0			0						5.4			0						0			0
North GP	Garfield, OK	2017	grain sorghum	36.23332N, -98.03613W	8/8/2017	0	52.92	52.92	108				0			0						0			0						0			0
North GP	Garfield, OK	2017	grain sorghum	36.23332N, -98.03613W	8/15/2017	8.64	412.56	421.2	108				0			0						0			0						0			1.08
North GP	Garfield, OK	2017	grain sorghum	36.23332N, -98.03613W	8/24/2017	1.08	59.4	60.48	108				0			0						0			0						0			0
North GP	Garfield, OK	2017	grain sorghum	36.53228N, -97.58606W	6/9/2017	0	0	0	108				0			0						0			0						0			0
North GP	Garfield, OK	2017	grain sorghum	36.53228N, -97.58606W	6/15/2017	0	0	0	108				0			0						0			0						0			0
North GP	Garfield, OK	2017	grain sorghum	36.53228N, -97.58606W	6/21/2017	0	0	0	108				0			0						0			0						0			0
North GP	Garfield, OK	2017	grain sorghum	36.53228N, -97.58606W	6/28/2017	0	0	0	108				0			0						0			0						0			0
North GP	Garfield, OK	2017	grain sorghum	36.53228N, -97.58606W	7/10/2017	0	0	0	108				0			0						0			0						0			0
North GP	Garfield, OK	2017	grain sorghum	36.53228N, -97.58606W	7/18/2017	0	0	0	108				0			0						1.08			0						0			0
North GP	Garfield, OK	2017	grain sorghum	36.53228N, -97.58606W	7/25/2017	0	0	0	108				0			0						0			0						0			0
North GP	Garfield, OK	2017	grain sorghum	36.53228N, -97.58606W	8/3/2017	1.08	1.08	2.16	108				0			0						0			0						0			0
North GP	Garfield, OK	2017	grain sorghum	36.53228N, -97.58606W	8/8/2017	0	0	0	108				0			0						0			1.08						0			0
North GP	Garfield, OK	2017	grain sorghum	36.53228N, -97.58606W	8/15/2017	3.24	120.96	124.2	108				0			0						0			0						0			0
North GP	Garfield, OK	2017	grain sorghum	36.53228N, -97.58606W	8/24/2017	3.24	50.76	54	108				0			0						0			1.08						0			0
North GP	Garfield, OK	2017	grain sorghum	36.53228N, -97.58606W	8/31/2017	12.96	867.24	880.2	108				0			0						1.08			0						0			0
North GP	Garfield, OK	2017	grain sorghum	36.53228N, -97.58606W	9/7/2017	54	2916	2970	108				0			0						2.16			0						4.32			1.08
North GP	Garfield, OK	2017	grain sorghum	36.53739N, -97.6398W	6/9/2017	0	0	0	108				0			0						0			0						0			0
North GP	Garfield, OK	2017	grain sorghum	36.53739N, -97.6398W	6/15/2017	0	8.64	8.64	108				0			0						0			0						0			0
North GP	Garfield, OK	2017	grain sorghum	36.53739N, -97.6398W	6/21/2017	0	0	0	108				0			0						0			1.08						0			0
North GP	Noble, OK	2017	grain sorghum	36.23226N, 97.07277W				6924	2592	2.6713	12	4	39	0.00563258	0.0150463	0	0	0	39	0.00563258	0.0150463	27	0.00389948	0.0104167	0	0	0	27	0.00389948	0.0104167	13	0.00187753	0.00501543	8	0.0011554	0.00308642	2017-06-01	2017-08-31	ncok	Noble, OK	14800	1153	87238	16.9651	1.32167	64.6003	0.0320961	78.5142	2017-06-01
North GP	Noble, OK	2017	grain sorghum	36.23226N, -97.07277W	6/16/2017	1.08	0	1.08	108				0			0						0			0						0			0
North GP	Noble, OK	2017	grain sorghum	36.23226N, -97.07277W	6/23/2017	0	0	0	108				0			0						0			0						0			0
North GP	Noble, OK	2017	grain sorghum	36.24294N, -97.08736W	6/1/2017	0	0	0	108				0			0						0			0						0			0
North GP	Noble, OK	2017	grain sorghum	36.24294N, -97.08736W	6/16/2017	0	0	0	108				0			0						0			0						0			0
North GP	Noble, OK	2017	grain sorghum	36.24294N, -97.08736W	6/23/2017	0	0	0	108				0			0						0			0						0			0
North GP	Noble, OK	2017	grain sorghum	36.25671N, -97.0725W	6/16/2017	0	2.16	2.16	108				0			0						0			0						0			0
North GP	Noble, OK	2017	grain sorghum	36.25671N, -97.0725W	6/23/2017	0	0	0	108				0			0						0			0						0			0
North GP	Noble, OK	2017	grain sorghum	36.25671N, -97.0725W	6/28/2017	1.08	0	1.08	108				0			0						0			0						2.16			0
North GP	Noble, OK	2017	grain sorghum	36.25671N, -97.0725W	7/10/2017	1.08	22.68	23.76	108				0			0						0			0						0			0
North GP	Noble, OK	2017	grain sorghum	36.25671N, -97.0725W	7/18/2017	0	23.76	23.76	108				0			0						0			0						0			1.08
North GP	Noble, OK	2017	grain sorghum	36.25671N, -97.0725W	7/25/2017	0	4.32	4.32	108				0			0						0			0						0			0
North GP	Noble, OK	2017	grain sorghum	36.25671N, -97.0725W	8/3/2017	0	0	0	108				0			0						5.4			0						0			0
North GP	Noble, OK	2017	grain sorghum	36.25671N, -97.0725W	8/8/2017	18.36	82.08	100.44	108				0			0						20.52			0						10.8			5.4
North GP	Noble, OK	2017	grain sorghum	36.25671N, -97.0725W	8/24/2017	6.48	1154.52	1161	108				0			0						0			0						0			0
North GP	Noble, OK	2017	grain sorghum	36.25671N, -97.0725W	8/31/2017	60.48	4428	4488.48	108				6.48			0						0			0						0			0
North GP	Noble, OK	2017	grain sorghum	36.26206N, -97.36944W	6/1/2017	0	0	0	108				0			0						0			0						0			0
North GP	Noble, OK	2017	grain sorghum	36.26206N, -97.36944W	6/16/2017	0	2.16	2.16	108				0			0						1.08			0						0			0
North GP	Noble, OK	2017	grain sorghum	36.26206N, -97.36944W	6/28/2017	0	0	0	108				2.16			0						0			0						0			1.08
North GP	Noble, OK	2017	grain sorghum	36.26206N, -97.36944W	7/10/2017	3.24	10.8	14.04	108				2.16			0						0			0						0			0
North GP	Noble, OK	2017	grain sorghum	36.26206N, -97.36944W	7/18/2017	1.08	179.28	180.36	108				18.36			0						0			0						0			0
North GP	Noble, OK	2017	grain sorghum	36.26206N, -97.36944W	7/25/2017	0	0	0	108				6.48			0						0			0						0			0
North GP	Noble, OK	2017	grain sorghum	36.26206N, -97.36944W	8/3/2017	0	0	0	108				3.24			0						0			0						0			0
North GP	Noble, OK	2017	grain sorghum	36.26206N, -97.36944W	8/8/2017	4.32	5.4	9.72	108				0			0						0			0						0			0
North GP	Noble, OK	2017	grain sorghum	36.26206N, -97.36944W	8/15/2017	219.24	693.36	912.6	108				0			0						0			0						0			0
North GP	Grant, OK	2017	grain sorghum	36.70195N, 97.55369w				14157	1512	9.3631	14	2	240	0.0169527	0.15873	39	0.00275482	0.0257937	279	0.0197076	0.184524	33	0.002331	0.0218254	3	0.000211909	0.00198413	36	0.00254291	0.0238095	83	0.00586282	0.0548942	4	0.000282546	0.0026455	2017-06-21	2017-10-03	ncok	Grant, OK	11298	72	87234	12.9514	0.0825366	33.2153	0	78.5106	2017-06-21
North GP	Grant, OK	2017	grain sorghum	36.70195N, -97.55369W	7/18/2017	0	0	0	108				0			0						0			0						0			0
North GP	Grant, OK	2017	grain sorghum	36.70195N, -97.55369W	7/25/2017	0	0	0	108				0			0						0			0						0			0
North GP	Grant, OK	2017	grain sorghum	36.70195N, -97.55369W	8/3/2017	4.32	15.12	19.44	108				0			0						0			0						0			0
North GP	Grant, OK	2017	grain sorghum	36.70195N, -97.55369W	8/8/2017	0	0	0	108				0			0						0			0						0			0
North GP	Grant, OK	2017	grain sorghum	36.70195N, -97.55369W	8/15/2017	8.64	123.12	131.76	108				2.16			0						0			0						0			0
North GP	Grant, OK	2017	grain sorghum	36.70195N, -97.55369W	8/24/2017	4.32	1995.84	2000.16	108				10.8			6.48						1.08			0						1.08			3.24
North GP	Grant, OK	2017	grain sorghum	36.70195N, -97.55369W	8/31/2017	103.68	10967.4	11071.1	108				51.84			0						2.16			1.08						1.08			0
North GP	Grant, OK	2017	grain sorghum	36.70195N, -97.55369W	9/7/2017	915.84	13171.7	14087.5	108				65.88			1.08						18.36			1.08						50.76			0
North GP	Grant, OK	2017	grain sorghum	36.70195N, -97.55369W	9/12/2017	4250.88	28431	32681.9	108				14.04			0						5.4			0						17.28			0
North GP	Grant, OK	2017	grain sorghum	36.70195N, -97.55369W	9/19/2017	1137.24	23207	24344.3	108				69.12			24.84						6.48			0						12.96			1.08
North GP	Grant, OK	2017	grain sorghum	36.70195N, -97.55369W	10/3/2017	0	20.52	20.52	108				25.92			6.48						0			1.08						0			0
North GP	Grant, OK	2017	grain sorghum	36.74447N, -97.55065W	6/21/2017	0	0	0	108				0			0						0			0						0			0
North GP	Grant, OK	2017	grain sorghum	36.74447N, -97.55065W	6/28/2017	0	0	0	108				0			0						0			0						0			0
North GP	Grant, OK	2017	grain sorghum	36.74447N, -97.55065W	7/10/2017	0	0	0	108				0			0						0			0						0			0
North GP	Kay, OK	2017	grain sorghum	36.81032N, 97.43284W				2476	2268	1.09171	15	3	14	0.00565428	0.00617284	0	0	0	14	0.00565428	0.00617284	11	0.00444265	0.00485009	0	0	0	11	0.00444265	0.00485009	45	0.0181745	0.0198413	6	0.00242326	0.0026455	2017-06-09	2017-10-03	ncok	Kay, OK	65211	3666	87232	74.7558	4.20259	14.9991	0	78.5088	2017-06-09
North GP	Kay, OK	2017	grain sorghum	36.81032N, -97.43284W	6/9/2017	0	0	0	108				0			0						0			0						0			0
North GP	Kay, OK	2017	grain sorghum	36.81032N, -97.43284W	6/16/2017	0	0	0	108				0			0						0			0						0			0
North GP	Kay, OK	2017	grain sorghum	36.81032N, -97.43284W	6/21/2017	0	0	0	108				0			0						0			0						0			0
North GP	Kay, OK	2017	grain sorghum	36.81032N, -97.43284W	6/28/2017	0	0	0	108				0			0						0			0						0			0
North GP	Kay, OK	2017	grain sorghum	36.81032N, -97.43284W	7/10/2017	0	6.48	6.48	108				0			0						0			0						0			0
North GP	Kay, OK	2017	grain sorghum	36.81032N, -97.43284W	7/18/2017	0	0	0	108				0			0						0			0						0			0
North GP	Kay, OK	2017	grain sorghum	36.81032N, -97.43284W	7/25/2017	0	0	0	108				0			0						0			0						0			0
North GP	Kay, OK	2017	grain sorghum	36.81032N, -97.43284W	8/3/2017	0	0	0	108				0			0						0			0						0			0
North GP	Kay, OK	2017	grain sorghum	36.81032N, -97.43284W	8/8/2017	0	0	0	108				0			0						0			0						0			0
North GP	Kay, OK	2017	grain sorghum	36.81032N, -97.43284W	8/15/2017	1.08	18.36	19.44	108				0			0						0			0						0			0
North GP	Kay, OK	2017	grain sorghum	36.81032N, -97.43284W	8/24/2017	3.24	16.2	19.44	108				0			0						0			0						0			0
North GP	Kay, OK	2017	grain sorghum	36.86963N, -97.05849W	6/28/2017	0	0	0	108				1.08			0						0			0						0			0
North GP	Kay, OK	2017	grain sorghum	36.93388N, -97.05849W	7/25/2017	1.08	4.32	5.4	108				0			0						0			0						0			0
North GP	Kay, OK	2017	grain sorghum	36.93388N, -97.05849W	8/3/2017	2.16	8.64	10.8	108				0			0						0			0						0			0
North GP	Kay, OK	2017	grain sorghum	36.93388N, -97.05849W	8/8/2017	6.48	33.48	39.96	108				0			0						0			0						0			0
North GP	Kay, OK	2017	grain sorghum	36.93388N, -97.05849W	8/15/2017	17.28	268.92	286.2	108				2.16			0						0			0						0			0
North GP	Kay, OK	2017	grain sorghum	36.93388N, -97.05849W	8/24/2017	7.56	114.48	122.04	108				0			0						1.08			0						1.08			0
North GP	Kay, OK	2017	grain sorghum	36.93388N, -97.05849W	8/31/2017	21.6	476.28	497.88	108				0			0						2.16			0						32.4			4.32
North GP	Kay, OK	2017	grain sorghum	36.93388N, -97.05849W	9/7/2017	101.52	1280.88	1382.4	108				6.48			0						7.56			0						10.8			0
North GP	Kay, OK	2017	grain sorghum	36.93388N, -97.05849W	9/19/2017	8.64	52.92	61.56	108				4.32			0						0			0						1.08			2.16
North GP	Kay, OK	2017	grain sorghum	36.93388N, -97.05849W	10/3/2017	4.32	20.52	24.84	108				0			0						0			0						0			0
North GP	Harvey, KS	2017	grain sorghum	37.05909N, 97.18128W				9983	2268	4.40168	11	2	33	0.00330562	0.0145503	17	0.00170289	0.00749559	50	0.00500851	0.0220459	41	0.00410698	0.0180776	11	0.00110187	0.00485009	52	0.00520886	0.0229277	1	0.00010017	0.000440917	1	0.00010017	0.000440917	2017-07-18	2017-10-03	ncok	Harvey, KS	52687	4276	87252	60.3849	4.90075	75.1983	0.634942	78.5268	7/18/12017
North GP	Harvey, KS	2017	grain sorghum	37.056N, -97.23079W	7/18/2017	0	0	0	108				0			0						0			0						0			0
North GP	Harvey, KS	2017	grain sorghum	37.056N, -97.23079W	7/25/2017	0	0	0	108				0			0						0			0						0			0
North GP	Harvey, KS	2017	grain sorghum	37.056N, -97.23079W	8/3/2017	0	290.52	290.52	108				11.88			0						15.12			0						0			0
North GP	Harvey, KS	2017	grain sorghum	37.056N, -97.23079W	8/8/2017	1.08	0	1.08	108				0			0						0			0						0			0
North GP	Harvey, KS	2017	grain sorghum	37.056N, -97.23079W	8/15/2017	2.16	58.32	60.48	108				0			0						0			0						0			0
North GP	Harvey, KS	2017	grain sorghum	37.056N, -97.23079W	8/24/2017	0	24.84	24.84	108				0			0						0			0						0			0
North GP	Harvey, KS	2017	grain sorghum	37.056N, -97.23079W	8/31/2017	0	125.28	125.28	108				0			0						0			0						0			0
North GP	Harvey, KS	2017	grain sorghum	37.056N, -97.23079W	9/7/2017	11.88	85.32	97.2	108				0			0						0			0						0			0
North GP	Harvey, KS	2017	grain sorghum	37.056N, -97.23079W	9/12/2017	6.48	34.56	41.04	108				0			0						0			0						0			0
North GP	Harvey, KS	2017	grain sorghum	37.056N, -97.23079W	9/19/2017	4.32	214.92	219.24	108				0			6.48						0			0						0			0
North GP	Harvey, KS	2017	grain sorghum	37.05909N, -97.18128W	7/18/2017	0	0	0	108				0			0						0			0						0			0
North GP	Harvey, KS	2017	grain sorghum	37.05909N, -97.18128W	7/25/2017	0	1.08	1.08	108				0			0						0			0						0			0
North GP	Harvey, KS	2017	grain sorghum	37.05909N, -97.18128W	8/3/2017	0	176.04	176.04	108				9.72			0						0			0						0			0
North GP	Harvey, KS	2017	grain sorghum	37.05909N, -97.18128W	8/8/2017	1.08	10.8	11.88	108				1.08			0						0			1.08						0			0
North GP	Harvey, KS	2017	grain sorghum	37.05909N, -97.18128W	8/15/2017	11.88	143.64	155.52	108				2.16			0						4.32			1.08						0			0
North GP	Harvey, KS	2017	grain sorghum	37.05909N, -97.18128W	8/24/2017	1.08	635.04	636.12	108				0			0						3.24			1.08						0			0
North GP	Harvey, KS	2017	grain sorghum	37.05909N, -97.18128W	8/31/2017	5.4	167.4	172.8	108				0			0						1.08			1.08						0			0
North GP	Harvey, KS	2017	grain sorghum	37.05909N, -97.18128W	9/7/2017	112.32	1004.4	1116.72	108				1.08			0						1.08			4.32						0			0
North GP	Harvey, KS	2017	grain sorghum	37.05909N, -97.18128W	9/12/2017	31.32	497.88	529.2	108				1.08			0						0			0						0			0
North GP	Harvey, KS	2017	grain sorghum	37.05909N, -97.18128W	9/19/2017	284.04	4416.12	4700.16	108				1.08			7.56						4.32			1.08						0			0
North GP	Harvey, KS	2017	grain sorghum	37.05909N, -97.18128W	10/3/2017	176.04	1448.28	1624.32	108				5.4			3.24						11.88			1.08						1.08			1.08
North GP	Garfield, OK	2018	grain sorghum	36.21422N, 98.01362W				4913	3456	1.42159	10	4	41	0.00834521	0.0118634	1	0.000203542	0.000289352	42	0.00854875	0.0121528	2	0.000407083	0.000578704	6	0.00122125	0.00173611	8	0.00162833	0.00231481	6	0.00122125	0.00173611	9	0.00183187	0.00260417	2018-06-05	2018-08-30	ncok	Garfield, OK	57458	734	87239	65.8627	0.841367	24.3767	0.00229255	78.5151	2018-06-05
North GP	Garfield, OK	2018	grain sorghum	36.2175N, -98.0155W	6/14/2018	0	0	0	108				0			0						0			1.08						0			0
North GP	Garfield, OK	2018	grain sorghum	36.2175N, -98.0155W	6/19/2018	0	0	0	108				0			0						0			0						0			0
North GP	Garfield, OK	2018	grain sorghum	36.2175N, -98.0155W	7/9/2018	0	0	0	108				0			0						0			0						0			0
North GP	Garfield, OK	2018	grain sorghum	36.4337N, -97.6012W	6/5/2018	0	0	0	108				0			0						0			0						0			0
North GP	Garfield, OK	2018	grain sorghum	36.4337N, -97.6012W	6/14/2018	0	0	0	108				0			0						0			0						0			0
North GP	Garfield, OK	2018	grain sorghum	36.4337N, -97.6012W	6/19/2018	0	0	0	108				0			0						0			0						0			0
North GP	Garfield, OK	2018	grain sorghum	36.4337N, -97.6012W	6/29/2018	0	0	0	108				0			0						0			0						0			0
North GP	Garfield, OK	2018	grain sorghum	36.4337N, -97.6012W	7/9/2018	0	6.48	6.48	108				0			0						0			0						0			0
North GP	Garfield, OK	2018	grain sorghum	36.4337N, -97.6012W	7/19/2018	5.4	278.64	284.04	108				0			0						0			0						0			0
North GP	Garfield, OK	2018	grain sorghum	36.4337N, -97.6012W	7/25/2018	4.32	33.48	37.8	108				0			0						0			0						0			0
North GP	Garfield, OK	2018	grain sorghum	36.4337N, -97.6012W	8/2/2018	3.24	450.36	453.6	108				9.72			0						0			0						0			0
North GP	Garfield, OK	2018	grain sorghum	36.4337N, -97.6012W	8/20/2018	14.04	588.6	602.64	108				0			0						0			0						0			0
North GP	Garfield, OK	2018	grain sorghum	36.4337N, -97.6012W	8/30/2018	18.36	1197.72	1216.08	108				0			0						1.08			0						1.08			2.16
North GP	Garfield, OK	2018	grain sorghum	36.4624N, -97.59W	6/5/2018	0	0	0	108				0			0						0			0						0			0
North GP	Garfield, OK	2018	grain sorghum	36.4624N, -97.59W	6/14/2018	0	0	0	108				0			0						0			0						0			0
North GP	Garfield, OK	2018	grain sorghum	36.4624N, -97.59W	6/19/2018	0	0	0	108				0			0						0			0						0			0
North GP	Garfield, OK	2018	grain sorghum	36.4624N, -97.59W	6/29/2018	0	0	0	108				0			0						0			0						0			0
North GP	Garfield, OK	2018	grain sorghum	36.4624N, -97.59W	7/9/2018	1.08	7.56	8.64	108				0			0						0			1.08						0			0
North GP	Garfield, OK	2018	grain sorghum	36.4624N, -97.59W	7/19/2018	0	0	0	108				0			0						0			0						0			2.16
North GP	Garfield, OK	2018	grain sorghum	36.4624N, -97.59W	7/25/2018	0	0	0	108				0			0						0			1.08						0			0
North GP	Garfield, OK	2018	grain sorghum	36.4624N, -97.59W	8/2/2018	0	5.4	5.4	108				0			0						0			0						0			0
North GP	Garfield, OK	2018	grain sorghum	36.4624N, -97.59W	8/30/2018	1.08	144.72	145.8	108				0			0						0			0						1.08			0
North GP	Garfield, OK	2018	grain sorghum	36.5347N, -97.6243W	6/5/2018	0	0	0	108				0			0						0			0						0			0
North GP	Garfield, OK	2018	grain sorghum	36.5347N, -97.6243W	6/14/2018	0	0	0	108				0			0						0			0						0			0
North GP	Garfield, OK	2018	grain sorghum	36.5347N, -97.6243W	6/19/2018	0	0	0	108				0			0						0			0						0			0
North GP	Garfield, OK	2018	grain sorghum	36.5347N, -97.6243W	6/29/2018	0	0	0	108				0			1.08						0			0						0			0
North GP	Garfield, OK	2018	grain sorghum	36.5347N, -97.6243W	7/9/2018	10.8	135	145.8	108				0			0						1.08			0						0			0
North GP	Garfield, OK	2018	grain sorghum	36.5347N, -97.6243W	7/19/2018	10.8	813.24	824.04	108				0			0						0			0						0			3.24
North GP	Garfield, OK	2018	grain sorghum	36.5347N, -97.6243W	7/25/2018	3.24	73.44	76.68	108				14.04			0						0			0						0			0
North GP	Garfield, OK	2018	grain sorghum	36.5347N, -97.6243W	8/2/2018	0	32.4	32.4	108				0			0						0			0						0			0
North GP	Garfield, OK	2018	grain sorghum	36.5347N, -97.6243W	8/20/2018	14.04	612.36	626.4	108				0			0						0			0						0			0
North GP	Garfield, OK	2018	grain sorghum	36.5347N, -97.6243W	8/30/2018	0	447.12	447.12	108				17.28			0						0			0						4.32			1.08
North GP	Noble, OK	2018	grain sorghum	36.23226N, 97.07277W				13746	1620	8.48519	11	2	53	0.00385567	0.032716	0	0	0	53	0.00385567	0.032716	71	0.00516514	0.0438272	19	0.00138222	0.0117284	90	0.00654736	0.0555556	4	0.000290994	0.00246914	3	0.000218245	0.00185185	2018-06-05	2018-09-12	ncok	Noble, OK	14745	2013	87238	16.902	2.30748	63.0436	0.0252184	78.5142	2018-06-05
North GP	Noble, OK	2018	grain sorghum	36.2611N, -97.0734W	6/5/2018	0	3.24	3.24	108				0			0						0			1.08						0			0
North GP	Noble, OK	2018	grain sorghum	36.2611N, -97.0734W	6/14/2018	0	0	0	108				0			0						0			0						0			0
North GP	Noble, OK	2018	grain sorghum	36.2611N, -97.0734W	6/19/2018	0	0	0	108				0			0						0			0						0			0
North GP	Noble, OK	2018	grain sorghum	36.2611N, -97.0734W	6/29/2018	0	6.48	6.48	108				0			0						0			0						0			0
North GP	Noble, OK	2018	grain sorghum	36.2611N, -97.0734W	7/9/2018	0	3.24	3.24	108				0			0						0			1.08						0			0
North GP	Noble, OK	2018	grain sorghum	36.2611N, -97.0734W	7/19/2018	0	10.8	10.8	108				0			0						0			0						0			0
North GP	Noble, OK	2018	grain sorghum	36.2611N, -97.0734W	7/25/2018	0	5.4	5.4	108				1.08			0						0			0						0			0
North GP	Noble, OK	2018	grain sorghum	36.2611N, -97.0734W	8/2/2018	2.16	25.92	28.08	108				0			0						0			0						0			0
North GP	Noble, OK	2018	grain sorghum	36.2611N, -97.0734W	8/20/2018	43.2	361.8	405	108				0			0						2.16			0						0			0
North GP	Noble, OK	2018	grain sorghum	36.3956N, -97.46115W	7/19/2018	0	3.24	3.24	108				0			0						0			1.08						0			0
North GP	Noble, OK	2018	grain sorghum	36.3956N, -97.46115W	7/25/2018	0	0	0	108				0			0						0			0						0			0
North GP	Noble, OK	2018	grain sorghum	36.3956N, -97.46115W	8/2/2018	0	171.72	171.72	108				0			0						0			0						0			0
North GP	Noble, OK	2018	grain sorghum	36.3956N, -97.46115W	8/20/2018	143.64	4008.96	4152.6	108				0			0						33.48			0						0			0
North GP	Noble, OK	2018	grain sorghum	36.3956N, -97.46115W	8/30/2018	22.68	2597.4	2620.08	108				2.16			0						12.96			0						1.08			2.16
North GP	Noble, OK	2018	grain sorghum	36.3956N, -97.46115W	9/12/2018	159.84	6175.44	6335.28	108				49.68			0						22.68			6.48						3.24			1.08
North GP	Grant, OK	2018	grain sorghum	36.70195N, 97.55369w				1607	1728	0.929977	10	2	0	0	0	0	0	0	0	0	0	3	0.00186683	0.00173611	4	0.00248911	0.00231481	7	0.00435594	0.00405093	4	0.00248911	0.00231481	2	0.00124456	0.00115741	2018-06-05	2018-08-31	ncok	Grant, OK	63107	673	87251	72.3281	0.771338	18.943	0.120342	78.5259	2018-06-05
North GP	Grant, Ok	2018	grain sorghum	36.7632N, -97.5471W	6/5/2018	0	0	0	108				0			0						0			0						0			0
North GP	Grant, Ok	2018	grain sorghum	36.7632N, -97.5471W	6/14/2018	0	0	0	108				0			0						0			1.08						0			0
North GP	Grant, Ok	2018	grain sorghum	36.7632N, -97.5471W	6/29/2018	0	0	0	108				0			0						0			0						0			0
North GP	Grant, Ok	2018	grain sorghum	36.7632N, -97.5471W	7/9/2018	1.08	0	1.08	108				0			0						0			0						0			0
North GP	Grant, Ok	2018	grain sorghum	36.7632N, -97.5471W	7/19/2018	0	0	0	108				0			0						0			0						0			0
North GP	Grant, Ok	2018	grain sorghum	36.7632N, -97.5471W	7/25/2018	0	0	0	108				0			0						0			0						0			0
North GP	Grant, Ok	2018	grain sorghum	36.7632N, -97.5471W	8/2/2018	0	0	0	108				0			0						0			0						0			0
North GP	Grant, Ok	2018	grain sorghum	36.7632N, -97.5471W	8/20/2018	125.28	303.48	428.76	108				0			0						0			0						0			0
North GP	Grant, Ok	2018	grain sorghum	36.7632N, -97.5471W	8/30/2018	6.48	41.04	47.52	108				0			0						0			0						0			0
North GP	Grant, Ok	2018	grain sorghum	36.81053N, -97.52867W	6/29/2018	0	0	0	108				0			0						0			0						0			0
North GP	Grant, Ok	2018	grain sorghum	36.81053N, -97.52867W	7/9/2018	0	0	0	108				0			0						3.24			0						0			2.16
North GP	Grant, Ok	2018	grain sorghum	36.81053N, -97.52867W	7/19/2018	0	189	189	108				0			0						0			0						0			0
North GP	Grant, Ok	2018	grain sorghum	36.81053N, -97.52867W	7/25/2018	0	4.32	4.32	108				0			0						0			0						0			0
North GP	Grant, Ok	2018	grain sorghum	36.81053N, -97.52867W	8/2/2018	0	45.36	45.36	108				0			0						0			0						0			0
North GP	Grant, Ok	2018	grain sorghum	36.81053N, -97.52867W	8/20/2018	47.52	356.4	403.92	108				0			0						0			0						1.08			0
North GP	Grant, Ok	2018	grain sorghum	36.81053N, -97.52867W	8/31/2018	7.56	479.52	487.08	108				0			0						0			1.08						3.24			0
North GP	Kay, OK	2018	grain sorghum	36.81032N, 97.43284W				2242	972	2.30658	9	1	0	0	0	0	0	0	0	0	0	3	0.00133809	0.00308642	4	0.00178412	0.00411523	7	0.00312221	0.00720165	1	0.00044603	0.00102881	4	0.00178412	0.00411523	2018-06-05	2018-08-30	ncok	Kay, OK	67737	1454	87232	77.6515	1.66682	13.3346	0.00229274	78.5088	2018-06-05
North GP	Kay, OK	2018	grain sorghum	36.6374N, -97.075W	6/5/2018	0	0	0	108				0			0						0			2.16						0			0
North GP	Kay, OK	2018	grain sorghum	36.6374N, -97.075W	6/14/2018	0	0	0	108				0			0						0			0						0			0
North GP	Kay, OK	2018	grain sorghum	36.6374N, -97.075W	6/19/2018	0	0	0	108				0			0						0			0						0			0
North GP	Kay, OK	2018	grain sorghum	36.6374N, -97.075W	6/29/2018	0	0	0	108				0			0						0			0						0			0
North GP	Kay, OK	2018	grain sorghum	36.6374N, -97.075W	7/9/2018	0	0	0	108				0			0						1.08			0						0			0
North GP	Kay, OK	2018	grain sorghum	36.6374N, -97.075W	7/19/2018	0	34.56	34.56	108				0			0						0			0						0			2.16
North GP	Kay, OK	2018	grain sorghum	36.6374N, -97.075W	7/25/2018	0	0	0	108				0			0						0			0						0			0
North GP	Kay, OK	2018	grain sorghum	36.6374N, -97.075W	8/2/2018	4.32	820.8	825.12	108				0			0						0			0						0			0
North GP	Kay, OK	2018	grain sorghum	36.6374N, -97.075W	8/30/2018	32.4	1350	1382.4	108				0			0						2.16			0						1.08			2.16
North GP	Sumner, KS	2018	grain sorghum	37.05565N, 97.19477W				13768	2592	5.31173	15	4	90	0.0065369	0.0347222	0	0	0	90	0.0065369	0.0347222	24	0.00174317	0.00925926	15	0.00108948	0.00578704	39	0.00283266	0.0150463	9	0.00065369	0.00347222	3	0.000217897	0.00115741	2018-06-05	2018-09-12	ncok	Sumner, KS	53380	9455	87246	61.1833	10.8372	29.2369	0	78.5214	2018-06-05
North GP	Sumner, KS	2018	grain sorghum	37.05565N, -97.19477W	8/30/2018	95.04	3346.92	3441.96	108				6.48			0						12.96			3.24						2.16			1.08
North GP	Sumner, KS	2018	grain sorghum	37.05565N, -97.19477W	9/12/2018	37.8	918	955.8	108				1.08			0						2.16			1.08						1.08			0
North GP	Sumner, KS	2018	grain sorghum	37.0562N, -97.21993W	7/11/2018	0	0	0	108				0			0						0			0						0			0
North GP	Sumner, KS	2018	grain sorghum	37.0562N, -97.21993W	7/20/2018	0	42.12	42.12	108				0			0						0			0						0			0
North GP	Sumner, KS	2018	grain sorghum	37.0562N, -97.21993W	7/31/2018	0	77.76	77.76	108				0			0						0			1.08						0			0
North GP	Sumner, KS	2018	grain sorghum	37.0562N, -97.21993W	8/16/2018	23.76	753.84	777.6	108				41.04			0						0			0						0			0
North GP	Sumner, KS	2018	grain sorghum	37.0574N, -97.1653W	6/5/2018	0	0	0	108				0			0						0			0						0			0
North GP	Sumner, KS	2018	grain sorghum	37.0574N, -97.1653W	6/14/2018	0	0	0	108				0			0						0			0						0			0
North GP	Sumner, KS	2018	grain sorghum	37.0574N, -97.1653W	6/19/2018	0	0	0	108				0			0						0			0						0			0
North GP	Sumner, KS	2018	grain sorghum	37.0574N, -97.1653W	6/29/2018	0	0	0	108				0			0						0			0						0			0
North GP	Sumner, KS	2018	grain sorghum	37.0574N, -97.1653W	7/9/2018	3.24	25.92	29.16	108				0			0						0			0						0			0
North GP	Sumner, KS	2018	grain sorghum	37.0574N, -97.1653W	7/25/2018	0	4.32	4.32	108				0			0						0			1.08						0			0
North GP	Sumner, KS	2018	grain sorghum	37.0574N, -97.1653W	8/2/2018	0	1.08	1.08	108				0			0						0			0						0			0
North GP	Sumner, KS	2018	grain sorghum	37.0574N, -97.1653W	8/20/2018	46.44	1540.08	1586.52	108				0			0						0			0						0			0
North GP	Sumner, KS	2018	grain sorghum	37.0574N, -97.1653W	8/30/2018	128.52	6662.52	6791.04	108				39.96			0						4.32			0						5.4			10.8
North GP	Sumner, KS	2018	grain sorghum	37.0591N, -97.2199W	6/5/2018	0	0	0	108				0			0						0			0						0			0
North GP	Sumner, KS	2018	grain sorghum	37.0591N, -97.2199W	6/14/2018	0	0	0	108				0			0						0			0						0			0
North GP	Sumner, KS	2018	grain sorghum	37.0591N, -97.2199W	6/19/2018	0	0	0	108				0			0						0			1.08						0			0
North GP	Sumner, KS	2018	grain sorghum	37.0591N, -97.2199W	6/29/2018	0	0	0	108				0			0						0			0						0			0
North GP	Sumner, KS	2018	grain sorghum	37.0591N, -97.2199W	7/9/2018	0	0	0	108				0			0						0			0						0			0
North GP	Sumner, KS	2018	grain sorghum	37.0591N, -97.2199W	7/19/2018	1.08	2.16	3.24	108				0			0						0			0						0			1.08
North GP	Sumner, KS	2018	grain sorghum	37.0591N, -97.2199W	7/25/2018	1.08	0	1.08	108				1.08			0						0			0						0			0
North GP	Sumner, KS	2018	grain sorghum	37.0591N, -97.2199W	8/2/2018	0	22.68	22.68	108				0			0						0			0						0			0
North GP	Sumner, KS	2018	grain sorghum	37.0591N, -97.2199W	8/20/2018	3.24	30.24	33.48	108				0			0						4.32			0						0			0
North GP	Garfield, OK	2019	grain sorghum	36.21422N, 98.01362W				169968	3358	50.6158	11	5	245	0.00144145	0.0729601	0	0	0	245	0.00144145	0.0729601	30	0.000176504	0.00893389	10	5.88346e-05	0.00297796	40	0.000235338	0.0119119	129	0.000758966	0.0384157	22	0.000129436	0.00655152	2019-07-08	2019-10-02	ncok	Garfield, OK	58917	966	87239	67.5352	1.1073	24.0833	0.0504362	78.5151	2019-07-08
North GP	Garfield, OK	2019	grain sorghum	36.397008N, -97.550544W	9/3/2019	124.32	778.68	903	84				4.2			0						0			0.84						0			0
North GP	Garfield, OK	2019	grain sorghum	36.397008N, -97.550544W	9/10/2019	77.28	2998.8	3076.08	84				32.76			0						3.36			0						0			0.84
North GP	Garfield, OK	2019	grain sorghum	36.397008N, -97.550544W	9/19/2019	27.72	7092.96	7120.68	84				48.72			0						20.16			1.68						10.92			1.68
North GP	Garfield, OK	2019	grain sorghum	36.520017N, -97.58645W	7/8/2019	0	0	0	108				0			0						0			0						0			0
North GP	Garfield, OK	2019	grain sorghum	36.520017N, -97.58645W	7/18/2019	0	0	0	108				0			0						0			0						0			0
North GP	Garfield, OK	2019	grain sorghum	36.520017N, -97.58645W	7/26/2019	0	1.08	1.08	108				0			0						0			0						0			0
North GP	Garfield, OK	2019	grain sorghum	36.520017N, -97.58645W	8/2/2019	0	4.32	4.32	108				0			0						0			0						0			0
North GP	Garfield, OK	2019	grain sorghum	36.520017N, -97.58645W	8/16/2019	8.64	213.84	222.48	108				16.2			0						0			0						3.24			0
North GP	Garfield, OK	2019	grain sorghum	36.520017N, -97.58645W	8/27/2019	8.4	206.64	215.04	84				20.16			0						0			0						0			0.84
North GP	Garfield, OK	2019	grain sorghum	36.520017N, -97.58645W	9/3/2019	15.96	613.2	629.16	84				17.64			0						0.84			0						0.84			0
North GP	Garfield, OK	2019	grain sorghum	36.563733N, -97.637667W	7/8/2019	0	0	0	108				0			0						0			0						0			0
North GP	Garfield, OK	2019	grain sorghum	36.563733N, -97.637667W	7/18/2019	0	3.24	3.24	108				0			0						0			0						0			0
North GP	Garfield, OK	2019	grain sorghum	36.563733N, -97.637667W	7/26/2019	1.08	43.2	44.28	108				0			0						0			0						0			0
North GP	Garfield, OK	2019	grain sorghum	36.563733N, -97.637667W	8/2/2019	1.08	44.28	45.36	108				20.52			0						0			0						0			0
North GP	Garfield, OK	2019	grain sorghum	36.563733N, -97.637667W	8/16/2019	5.4	50.76	56.16	108				0			0						0			0						0			0
North GP	Garfield, OK	2019	grain sorghum	36.563733N, -97.637667W	8/27/2019	5.88	131.04	136.92	84				0			0						0			0						0			0
North GP	Garfield, OK	2019	grain sorghum	36.563733N, -97.637667W	9/3/2019	25.2	1690.92	1716.12	84				14.28			0						0			0						0			0.84
North GP	Garfield, OK	2019	grain sorghum	36.563733N, -97.637667W	9/10/2019	62.16	2431.8	2493.96	84				8.4			0						0			0						0.84			0.84
North GP	Garfield, OK	2019	grain sorghum	36.563733N, -97.637667W	9/19/2019	341.88	29472.2	29814.1	84				10.92			0						0.84			0						16.8			0.84
North GP	Garfield, OK	2019	grain sorghum	36.563733N, -97.637667W	9/27/2019	514.96	50416.9	50931.8	82				24.6			0						2.46			0						9.84			7.38
North GP	Garfield, OK	2019	grain sorghum	36.563733N, -97.637667W	10/2/2019	1475.28	69724.8	71200.1	72				0			0						0			2.16						82.08			5.76
North GP	Garfield, OK	2019	grain sorghum	36.563767N, -97.585667W	7/26/2019	0	0	0	108				0			0						0			0						0			0
North GP	Garfield, OK	2019	grain sorghum	36.563767N, -97.585667W	8/2/2019	0	0	0	108				0			0						0			0						0			0
North GP	Garfield, OK	2019	grain sorghum	36.563767N, -97.585667W	8/16/2019	15.12	131.76	146.88	108				3.24			0						1.08			0						3.24			0
North GP	Garfield, OK	2019	grain sorghum	36.563767N, -97.585667W	8/27/2019	31.92	156.24	188.16	84				3.36			0						0			0						0			0
North GP	Garfield, OK	2019	grain sorghum	36.563767N, -97.585667W	9/3/2019	25.2	199.08	224.28	84				1.68			0						0			0						0			1.68
North GP	Garfield, OK	2019	grain sorghum	36.563767N, -97.585667W	9/10/2019	8.4	98.28	106.68	84				3.36			0						0			0						0			0
North GP	Garfield, OK	2019	grain sorghum	36.563767N, -97.585667W	9/19/2019	26.88	111.72	138.6	84				0.84			0						0			0						0			0
North GP	Garfield, OK	2019	grain sorghum	36.563767N, -97.585667W	9/27/2019	6.72	37.8	44.52	84				0			0						0			0						0			0
North GP	Garfield, OK	2019	grain sorghum	36.563767N, -97.585667W	10/2/2019	11.76	37.8	49.56	84				0			0						0			0						0			0
North GP	Garfield, OK	2019	grain sorghum	36.587217N, -97.6402W	7/8/2019	0	0	0	108				0			0						0			0						0			0
North GP	Garfield, OK	2019	grain sorghum	36.587217N, -97.6402W	7/18/2019	0	5.4	5.4	108				0			0						0			0						0			0
North GP	Garfield, OK	2019	grain sorghum	36.587217N, -97.6402W	7/26/2019	0	0	0	108				0			0						0			0						0			0
North GP	Garfield, OK	2019	grain sorghum	36.587217N, -97.6402W	8/2/2019	0	2.16	2.16	108				0			0						0			0						0			0
North GP	Garfield, OK	2019	grain sorghum	36.587217N, -97.6402W	8/16/2019	30.24	417.96	448.2	108				14.04			0						1.08			0						1.08			1.08
North GP	Noble, OK	2019	grain sorghum	36.23226N, 97.07277W				578	1200	0.481667	9	2	0	0	0	0	0	0	0	0	0	0	0	0	2	0.00346021	0.00166667	2	0.00346021	0.00166667	0	0	0	1	0.0017301	0.000833333	2019-07-08	2019-09-19	ncok	Noble, OK	16069	1776	87238	18.4197	2.03581	60.7533	0.486027	78.5142	2019-07-08
North GP	Noble, OK	2019	grain sorghum	36.256531N, -97.071845W	7/8/2019	0	0	0	108				0			0						0			0						0			1.08
North GP	Noble, OK	2019	grain sorghum	36.256531N, -97.071845W	7/18/2019	0	18.36	18.36	108				0			0						0			0						0			0
North GP	Noble, OK	2019	grain sorghum	36.256531N, -97.071845W	7/26/2019	0	34.56	34.56	108				0			0						0			0						0			0
North GP	Noble, OK	2019	grain sorghum	36.256531N, -97.071845W	8/2/2019	0	33.48	33.48	108				0			0						0			0						0			0
North GP	Noble, OK	2019	grain sorghum	36.256531N, -97.071845W	8/16/2019	1.08	7.56	8.64	108				0			0						0			0						0			0
North GP	Noble, OK	2019	grain sorghum	36.256531N, -97.071845W	8/27/2019	3.36	15.12	18.48	84				0			0						0			0						0			0
North GP	Noble, OK	2019	grain sorghum	36.256531N, -97.071845W	9/3/2019	15.12	110.88	126	84				0			0						0			0						0			0
North GP	Noble, OK	2019	grain sorghum	36.256531N, -97.071845W	9/10/2019	4.2	68.88	73.08	84				0			0						0			0.84						0			0
North GP	Noble, OK	2019	grain sorghum	36.256531N, -97.071845W	9/19/2019	6.72	225.96	232.68	84				0			0						0			0						0			0
North GP	Noble, OK	2019	grain sorghum	36.268783N, -97.068033W	7/18/2019	1.08	19.44	20.52	108				0			0						0			0						0			0
North GP	Noble, OK	2019	grain sorghum	36.268783N, -97.068033W	7/26/2019	0	0	0	108				0			0						0			0						0			0
North GP	Noble, OK	2019	grain sorghum	36.268783N, -97.068033W	8/2/2019	0	11.88	11.88	108				0			0						0			0						0			0
North GP	Grant, OK	2019	grain sorghum	36.70195N, 97.55369w				14146	1140	12.4088	8	3	144	0.0101796	0.126316	44	0.00311042	0.0385965	188	0.01329	0.164912	22	0.00155521	0.0192982	5	0.000353457	0.00438596	27	0.00190867	0.0236842	18	0.00127244	0.0157895	11	0.000777605	0.00964912	2019-08-02	2019-10-02	ncok	Grant, OK	65966	746	87251	75.6049	0.855005	19.2651	0.123781	78.5259	2019-08-02
North GP	Grant, OK	2019	grain sorghum	36.631N, -97.587889W	8/2/2019	5.4	98.28	103.68	108				0			0						0			0						0			0
North GP	Grant, OK	2019	grain sorghum	36.631N, -97.587889W	8/16/2019	37.8	641.52	679.32	108				5.4			0						0			0						0			1.08
North GP	Grant, OK	2019	grain sorghum	36.631N, -97.587889W	8/27/2019	5.88	2256.24	2262.12	84				24.36			43.68						9.24			0						12.6			0
North GP	Grant, OK	2019	grain sorghum	36.631N, -97.587889W	9/3/2019	8.4	568.68	577.08	84				16.8			0						0			0						0			0
North GP	Grant, OK	2019	grain sorghum	36.678733N, -97.574867W	8/27/2019	5.88	121.8	127.68	84				12.6			0						0			0						0			0
North GP	Grant, OK	2019	grain sorghum	36.678733N, -97.574867W	9/3/2019	36.12	288.12	324.24	84				0.84			0						0			0						0			0.84
North GP	Grant, OK	2019	grain sorghum	36.678733N, -97.574867W	9/10/2019	5.88	462.84	468.72	84				0			0						0.84			0						0			0.84
North GP	Grant, OK	2019	grain sorghum	36.678733N, -97.574867W	9/19/2019	62.16	955.92	1018.08	84				4.2			0						0			0.84						0			0.84
North GP	Grant, OK	2019	grain sorghum	36.678733N, -97.574867W	9/27/2019	68.88	1071	1139.88	84				3.36			0						0			0.84						0			0.84
North GP	Grant, OK	2019	grain sorghum	36.678733N, -97.574867W	10/2/2019	21	3393.6	3414.6	84				16.8			0						7.56			0						0			1.68
North GP	Grant, OK	2019	grain sorghum	36.709491N, -97.554606W	9/3/2019	53.76	269.64	323.4	84				0			0						0			0						0			0
North GP	Grant, OK	2019	grain sorghum	36.709491N, -97.554606W	9/10/2019	88.2	1941.24	2029.44	84				29.4			0						4.2			0						3.36			3.36
North GP	Grant, OK	2019	grain sorghum	36.709491N, -97.554606W	9/19/2019	42	1636.32	1678.32	84				30.24			0						0			0.84						1.68			1.68
North GP	Kay, OK	2019	grain sorghum	36.81032N, 97.43284W				2258	1070	2.11028	9	2	5	0.00221435	0.0046729	0	0	0	5	0.00221435	0.0046729	0	0	0	2	0.00088574	0.00186916	2	0.00088574	0.00186916	0	0	0	1	0.00044287	0.000934579	2019-07-08	2019-09-27	ncok	Kay, OK	68084	7240	87232	78.0493	8.29971	14.4351	0.0034391	78.5088	2019-07-08
North GP	Kay, OK	2019	grain sorghum	36.804917N, -97.408783W	7/8/2019	0	0	0	108				0			0						0			0						0			0
North GP	Kay, OK	2019	grain sorghum	36.804917N, -97.408783W	7/18/2019	0	0	0	108				0			0						0			0						0			0
North GP	Kay, OK	2019	grain sorghum	36.804917N, -97.408783W	7/26/2019	0	0	0	108				0			0						0			0						0			0
North GP	Kay, OK	2019	grain sorghum	36.804917N, -97.408783W	8/2/2019	0	8.64	8.64	108				0			0						0			0						0			0
North GP	Kay, OK	2019	grain sorghum	36.804917N, -97.408783W	8/27/2019	30.24	255.36	285.6	84				0			0						0			0						0			0
North GP	Kay, OK	2019	grain sorghum	36.804917N, -97.408783W	9/3/2019	236.04	1214.64	1450.68	84				0			0						0			0.84						0			0
North GP	Kay, OK	2019	grain sorghum	36.804917N, -97.408783W	9/10/2019	22.1	475.15	497.25	85				5.1			0						0			0						0			0.85
North GP	Kay, OK	2019	grain sorghum	36.804917N, -97.408783W	9/19/2019	5.04	6.72	11.76	84				0			0						0			0						0			0
North GP	Kay, OK	2019	grain sorghum	36.804917N, -97.408783W	9/27/2019	0	4.25	4.25	85				0			0						0			0						0			0
North GP	Kay, OK	2019	grain sorghum	36.854183N, W	7/8/2019	0	0	0	216				0			0						0			0						0			0
South GP	Hill, Tx	2017	grain sorghum	31.92904N, 97.10237W				10308	1680	6.13571	7	3	193	0.0187233	0.114881	0	0	0	193	0.0187233	0.114881	29	0.00281335	0.0172619	23	0.00223128	0.0136905	52	0.00504463	0.0309524	5	0.00048506	0.00297619	2	0.000194024	0.00119048	2017-05-15	2017-07-14	ntex	Hill, Tx	49413	1387	87255	56.6306	1.58959	32.5208	0.00573033	78.5295	2017-05-15
South GP	Hill, Tx	2017	grain sorghum	31.92904N, -97.10237W	5/24/2017	0	21.6	21.6	120				9.6			0						0			0						0			0
South GP	Hill, Tx	2017	grain sorghum	31.92904N, -97.10237W	5/31/2017	1.2	19.2	20.4	120				0			0						0			0						0			0
South GP	Hill, Tx	2017	grain sorghum	31.92904N, -97.10237W	6/13/2017	6	49.2	55.2	120				0			0						0			0						0			0
South GP	Hill, Tx	2017	grain sorghum	32.09004N, -97.1258W	5/15/2017	0	33.6	33.6	120				2.4			0						0			0						0			0
South GP	Hill, Tx	2017	grain sorghum	32.09004N, -97.1258W	5/24/2017	2.2	35.2	37.4	110				4.4			0						2.2			0						0			0
South GP	Hill, Tx	2017	grain sorghum	32.09004N, -97.1258W	5/31/2017	3.9	67.6	71.5	130				0			0						0			0						0			0
South GP	Hill, Tx	2017	grain sorghum	32.09004N, -97.1258W	6/13/2017	3.6	61.2	64.8	120				0			0						0			0						0			0
South GP	Hill, Tx	2017	grain sorghum	32.09004N, -97.1258W	6/22/2017	4.8	105.6	110.4	120				0			0						0			0						0			0
South GP	Hill, Tx	2017	grain sorghum	32.09004N, -97.1258W	7/13/2017	241.2	1389.6	1630.8	120				50.4			0						0			0						2.4			2.4
South GP	Hill, Tx	2017	grain sorghum	32.13542N, -97.1076W	5/24/2017	0	1.2	1.2	120				0			0						0			0						0			0
South GP	Hill, Tx	2017	grain sorghum	32.13542N, -97.1076W	5/31/2017	3.6	13.2	16.8	120				6			0						0			0						2.4			0
South GP	Hill, Tx	2017	grain sorghum	32.13542N, -97.1076W	6/13/2017	31.2	1579.2	1610.4	120				0			0						0			2.4						0			0
South GP	Hill, Tx	2017	grain sorghum	32.13542N, -97.1076W	6/22/2017	21.6	789.6	811.2	120				0			0						0			0						0			0
South GP	Hill, Tx	2017	grain sorghum	32.13542N, -97.1076W	7/14/2017	524.4	5298	5822.4	120				120			0						26.4			20.4						0			0
South GP	Hill, Tx	2018	grain sorghum	31.92904N, 97.10237W				17851	1080	16.5287	5	3	548	0.0306986	0.507407	0	0	0	548	0.0306986	0.507407	0	0	0	20	0.00112039	0.0185185	20	0.00112039	0.0185185	2	0.000112039	0.00185185	18	0.00100835	0.0166667	2018-06-12	2018-06-28	ntex	Hill, Tx	50985	1326	87255	58.4322	1.51968	30.2527	0.0882471	78.5295	2018-06-12
South GP	Hill, Tx	2018	grain sorghum	31.91046N, -96.8641W	6/12/2018	0	82.8	82.8	120				3.6			0						0			0						0			0
South GP	Hill, Tx	2018	grain sorghum	31.91046N, -96.8641W	6/21/2018	4.8	2673.6	2678.4	120				45.6			0						0			0						0			9.6
South GP	Hill, Tx	2018	grain sorghum	31.91046N, -96.8641W	6/27/2018	27.6	1275.6	1303.2	120				336			0						0			9.6						0			2.4
South GP	Hill, Tx	2018	grain sorghum	31.9124N, -96.85181W	6/12/2018	0	0	0	120				0			0						0			0						0			0
South GP	Hill, Tx	2018	grain sorghum	31.9124N, -96.85181W	6/20/2018	49.2	1119.6	1168.8	120				20.4			0						0			0						0			2.4
South GP	Hill, Tx	2018	grain sorghum	31.9124N, -96.85181W	6/28/2018	486	12044.4	12530.4	120				122.4			0						0			0						2.4			0
South GP	Hill, Tx	2018	grain sorghum	32.12342N, -97.17222W	6/12/2018	0	15.6	15.6	120				6			0						0			0						0			0
South GP	Hill, Tx	2018	grain sorghum	32.12342N, -97.17222W	6/20/2018	1.2	69.6	70.8	120				14.4			0						0			0						0			3.6
South GP	Hill, Tx	2018	grain sorghum	32.12342N, -97.17222W	6/27/2018	0	1.2	1.2	120				0			0						0			0						0			0
South GP	Hunt, Tx	2018	grain sorghum	33.16931N, 96.16778W				1671	240	6.9625	2	1	0	0	0	0	0	0	0	0	0	0	0	0	0	0	0	0	0	0	0	0	0	0	0	0	2018-07-12	2018-07-19	ntex	Hunt, Tx	32618	1048	87246	37.3862	1.2012	43.3028	0.247576	78.5214	2018-07-12
South GP	Hunt, Tx	2018	grain sorghum	33.16931N, -96.16778W	7/12/2018	182.4	748.8	931.2	120				0			0						0			0						0			0
South GP	Hunt, Tx	2018	grain sorghum	33.16931N, -96.16778W	7/19/2018	26.4	712.8	739.2	120				0			0						0			0						0			0
South GP	Cooke, Tx	2018	grain sorghum	33.73483N, 97.08667W				88	360	0.244444	1	3	20	0.227273	0.0555556	0	0	0	20	0.227273	0.0555556	0	0	0	0	0	0	0	0	0	0	0	0	4	0.0454545	0.0111111	2018-06-12	2018-06-27	ntex	Cooke, Tx	3698	51	87235	4.23912	0.0584628	32.2141	0.0355362	78.5115	2018-06-12
South GP	Cooke, Tx	2018	grain sorghum	33.73483N, -97.08667W	6/12/2018	0	15.6	15.6	120				6			0						0			0						0			0
South GP	Cooke, Tx	2018	grain sorghum	33.73483N, -97.08667W	6/20/2018	1.2	69.6	70.8	120				14.4			0						0			0						0			3.6
South GP	Cooke, Tx	2018	grain sorghum	33.73483N, -97.08667W	6/27/2018	0	1.2	1.2	120				0			0						0			0						0			0
North GP	Beaver, OK	2017	grain sorghum	36.52987N, 100.57195W				1894	3780	0.501058	10	7	40	0.0211193	0.010582	458	0.241816	0.121164	498	0.262936	0.131746	2	0.00105597	0.000529101	4	0.00211193	0.0010582	6	0.0031679	0.0015873	0	0	0	3	0.00158395	0.000793651	2017-07-07	2017-10-16	phok	Beaver, OK	43370	10326	87254	49.7055	11.8344	18.8874	2.51908	78.5286	2017-07-07
North GP	Beaver, OK	2017	grain sorghum	36.52897N, -100.57195W	7/7/2017	0	0	0	108				0			0						0			0						0			0
North GP	Beaver, OK	2017	grain sorghum	36.52897N, -100.57195W	7/12/2017	0	0	0	108				1.08			0						0			0						0			0
North GP	Beaver, OK	2017	grain sorghum	36.52904N, -100.56756W	7/7/2017	0	0	0	108				0			0						0			0						0			0
North GP	Beaver, OK	2017	grain sorghum	36.52904N, -100.56756W	7/20/2017	0	0	0	108				0			0						0			0						0			0
North GP	Beaver, OK	2017	grain sorghum	36.52904N, -100.56756W	8/16/2017	0	2.16	2.16	108				0			0						0			0						0			0
North GP	Beaver, OK	2017	grain sorghum	36.52904N, -100.56756W	8/22/2017	0	0	0	108				0			1.08						0			0						0			0
North GP	Beaver, OK	2017	grain sorghum	36.52904N, -100.56756W	8/29/2017	1.08	99.36	100.44	108				0			1.08						0			0						0			0
North GP	Beaver, OK	2017	grain sorghum	36.52904N, -100.56756W	9/14/2017	0	114.48	114.48	108				0			0						0			0						0			0
North GP	Beaver, OK	2017	grain sorghum	36.52904N, -100.56756W	9/21/2017	1.08	76.68	77.76	108				2.16			0						0			2.16						0			0
North GP	Beaver, OK	2017	grain sorghum	36.52904N, -100.56756W	10/2/2017	0	12.96	12.96	108				1.08			0						0			1.08						0			0
North GP	Beaver, OK	2017	grain sorghum	36.52904N, -100.56756W	10/16/2017	0	11.88	11.88	108				0			0						0			0						0			0
North GP	Beaver, OK	2017	grain sorghum	36.61468N, -100.84076W	7/20/2017	0	0	0	108				0			0						0			0						0			0
North GP	Beaver, OK	2017	grain sorghum	36.61468N, -100.84076W	8/16/2017	0	6.48	6.48	108				2.16			9.72						0			0						0			0
North GP	Beaver, OK	2017	grain sorghum	36.61468N, -100.84076W	8/22/2017	0	64.8	64.8	108				0			18.36						0			0						0			0
North GP	Beaver, OK	2017	grain sorghum	36.61468N, -100.84076W	8/29/2017	2.16	43.2	45.36	108				0			45.36						1.08			0						0			0
North GP	Beaver, OK	2017	grain sorghum	36.61468N, -100.84076W	9/14/2017	2.16	17.28	19.44	108				2.16			72.36						0			0						0			0
North GP	Beaver, OK	2017	grain sorghum	36.61468N, -100.84076W	9/21/2017	4.32	14.04	18.36	108				0			27						0			0						0			1.08
North GP	Beaver, OK	2017	grain sorghum	36.61468N, -100.84076W	10/2/2017	0	24.84	24.84	108				1.08			6.48						0			0						0			0
North GP	Beaver, OK	2017	grain sorghum	36.61468N, -100.84076W	10/16/2017	1.08	8.64	9.72	108				0			32.4						0			0						0			0
North GP	Beaver, OK	2017	grain sorghum	36.61749N, -100.92545W	8/29/2017	3.24	87.48	90.72	108				0			46.44						0			0						0			0
North GP	Beaver, OK	2017	grain sorghum	36.61749N, -100.92545W	9/14/2017	11.88	214.92	226.8	108				1.08			28.08						0			0						0			1.08
North GP	Beaver, OK	2017	grain sorghum	36.61749N, -100.92545W	9/21/2017	18.36	141.48	159.84	108				0			20.52						0			0						0			0
North GP	Beaver, OK	2017	grain sorghum	36.61749N, -100.92545W	10/2/2017	15.12	56.16	71.28	108				5.4			86.4						0			0						0			0
North GP	Beaver, OK	2017	grain sorghum	36.61749N, -100.92545W	10/16/2017	1.08	6.48	7.56	108				0			0						0			0						0			0
North GP	Beaver, OK	2017	grain sorghum	36.62027N, -100.71441W	8/29/2017	4.32	169.56	173.88	108				0			0						1.08			0						0			0
North GP	Beaver, OK	2017	grain sorghum	36.6295N, -100.27664W	7/7/2017	0	0	0	108				0			0						0			0						0			0
North GP	Beaver, OK	2017	grain sorghum	36.6295N, -100.27664W	7/12/2017	0	0	0	108				0			0						0			0						0			0
North GP	Beaver, OK	2017	grain sorghum	36.6295N, -100.27664W	7/20/2017	0	0	0	108				0			0						0			0						0			0
North GP	Beaver, OK	2017	grain sorghum	36.6295N, -100.27664W	8/16/2017	2.16	18.36	20.52	108				0			0						0			0						0			1.08
North GP	Beaver, OK	2017	grain sorghum	36.6295N, -100.27664W	8/22/2017	0	0	0	108				0			0						0			0						0			0
North GP	Beaver, OK	2017	grain sorghum	36.6295N, -100.27664W	8/29/2017	0	14.04	14.04	108				0			0						0			0						0			0
North GP	Woodward, OK	2017	grain sorghum	36.57654N, 99.5837W				13	648	0.0200617	5	2	0	0	0	0	0	0	0	0	0	0	0	0	1	0.0769231	0.00154321	1	0.0769231	0.00154321	0	0	0	0	0	0	2017-07-07	2017-08-22	phok	Woodward, OK	14262	81	87253	16.3456	0.0928335	66.5226	1.64693	78.5277	2017-07-07
North GP	Woodward, OK	2017	grain sorghum	36.57654N, -99.5837W	7/7/2017	0	0	0	108				0			0						0			1.08						0			0
North GP	Woodward, OK	2017	grain sorghum	36.57654N, -99.5837W	7/12/2017	0	0	0	108				0			0						0			0						0			0
North GP	Woodward, OK	2017	grain sorghum	36.60147N, -99.65993W	7/7/2017	0	0	0	108				0			0						0			0						0			0
North GP	Woodward, OK	2017	grain sorghum	36.60147N, -99.65993W	7/20/2017	0	0	0	108				0			0						0			0						0			0
North GP	Woodward, OK	2017	grain sorghum	36.60147N, -99.65993W	8/16/2017	0	5.4	5.4	108				0			0						0			0						0			0
North GP	Woodward, OK	2017	grain sorghum	36.60147N, -99.65993W	8/22/2017	0	7.56	7.56	108				0			0						0			0						0			0
North GP	Harper, OK	2017	grain sorghum	36.62058N, 99.98204W				78	648	0.12037	6	1	0	0	0	1	0.0128205	0.00154321	1	0.0128205	0.00154321	0	0	0	1	0.0128205	0.00154321	1	0.0128205	0.00154321	0	0	0	0	0	0	2017-07-07	2017-08-29	phok	Harper, OK	11556	1155	87244	13.2456	1.32387	75.2052	0.635001	78.5196	2017-07-07
North GP	Harper, OK	2017	grain sorghum	36.62058N, -99.98204W	7/7/2017	0	0	0	108				0			0						0			0						0			0
North GP	Harper, OK	2017	grain sorghum	36.62058N, -99.98204W	7/12/2017	0	0	0	108				0			0						0			0						0			0
North GP	Harper, OK	2017	grain sorghum	36.62058N, -99.98204W	7/20/2017	0	0	0	108				0			0						0			0						0			0
North GP	Harper, OK	2017	grain sorghum	36.62058N, -99.98204W	8/16/2017	2.16	29.16	31.32	108				0			0						0			0						0			0
North GP	Harper, OK	2017	grain sorghum	36.62058N, -99.98204W	8/22/2017	0	29.16	29.16	108				0			0						0			1.08						0			0
North GP	Harper, OK	2017	grain sorghum	36.62058N, -99.98204W	8/29/2017	0	17.28	17.28	108				0			1.08						0			0						0			0
North GP	Texas, OK	2017	grain sorghum	36.67876N, 101.339W				1917	1728	1.10938	9	2	4	0.00208659	0.00231481	83	0.0432968	0.0480324	87	0.0453834	0.0503472	1	0.000521648	0.000578704	1	0.000521648	0.000578704	2	0.0010433	0.00115741	0	0	0	10	0.00521648	0.00578704	2017-07-12	2017-10-16	phok	Texas, OK	41712	2897	87235	47.8157	3.32091	38.5499	1.70574	78.5115	2017-07-12
North GP	Texas, OK	2017	grain sorghum	36.67876N, -101.339W	7/20/2017	0	0	0	108				0			0						0			0						0			0
North GP	Texas, OK	2017	grain sorghum	36.67876N, -101.339W	8/16/2017	3.24	351	354.24	108				0			0						0			0						0			0
North GP	Texas, OK	2017	grain sorghum	36.67876N, -101.339W	8/22/2017	2.16	465.48	467.64	108				3.24			2.16						1.08			0						0			0
North GP	Texas, OK	2017	grain sorghum	36.67876N, -101.339W	8/29/2017	6.48	249.48	255.96	108				0			0						0			1.08						0			1.08
North GP	Texas, OK	2017	grain sorghum	36.67876N, -101.339W	9/14/2017	2.16	6.48	8.64	108				0			1.08						0			0						0			1.08
North GP	Texas, OK	2017	grain sorghum	36.67876N, -101.339W	9/21/2017	9.72	20.52	30.24	108				0			0						0			0						0			0
North GP	Texas, OK	2017	grain sorghum	36.67876N, -101.339W	10/2/2017	0	25.92	25.92	108				0			0						0			0						0			0
North GP	Texas, OK	2017	grain sorghum	36.76455N, -101.70302W	7/12/2017	0	0	0	108				0			0						0			0						0			0
North GP	Texas, OK	2017	grain sorghum	36.76455N, -101.70302W	7/20/2017	0	0	0	108				0			0						0			0						0			0
North GP	Texas, OK	2017	grain sorghum	36.76455N, -101.70302W	8/16/2017	3.24	23.76	27	108				1.08			6.48						0			0						0			0
North GP	Texas, OK	2017	grain sorghum	36.76455N, -101.70302W	8/22/2017	1.08	66.96	68.04	108				0			28.08						0			0						0			0
North GP	Texas, OK	2017	grain sorghum	36.76455N, -101.70302W	8/29/2017	6.48	125.28	131.76	108				0			10.8						0			0						0			0
North GP	Texas, OK	2017	grain sorghum	36.76455N, -101.70302W	9/14/2017	43.2	271.08	314.28	108				0			11.88						0			0						0			4.32
North GP	Texas, OK	2017	grain sorghum	36.76455N, -101.70302W	9/21/2017	90.72	112.32	203.04	108				0			11.88						0			0						0			2.16
North GP	Texas, OK	2017	grain sorghum	36.76455N, -101.70302W	10/2/2017	7.56	9.72	17.28	108				0			4.32						0			0						0			1.08
North GP	Texas, OK	2017	grain sorghum	36.76455N, -101.70302W	10/16/2017	3.24	8.64	11.88	108				0			6.48						0			0						0			0
North GP	Cimarron, OK	2017	grain sorghum	36.72792N, 102.47385W				1773	2700	0.656667	9	5	14	0.00789622	0.00518519	2906	1.63903	1.0763	2920	1.64693	1.08148	8	0.00451213	0.00296296	1	0.000564016	0.00037037	9	0.00507614	0.00333333	3	0.00169205	0.00111111	5	0.00282008	0.00185185	2017-07-12	2017-10-16	phok	Cimarron, OK	46172	10080	87251	52.9186	11.5529	36.6804	0.212032	78.5259	2017-07-12
North GP	Cimarron, OK	2017	grain sorghum	36.72792N, -102.46633W	7/12/2017	0	0	0	108				0			0						0			1.08						0			0
North GP	Cimarron, OK	2017	grain sorghum	36.73331N, -102.46633W	7/20/2017	0	0	0	108				0			0						0			0						0			0
North GP	Cimarron, OK	2017	grain sorghum	36.73331N, -102.46633W	8/16/2017	1.08	25.92	27	108				2.16			10.8						1.08			0						0			0
North GP	Cimarron, OK	2017	grain sorghum	36.73331N, -102.46633W	8/22/2017	1.08	15.12	16.2	108				0			205.2						2.16			0						0			0
North GP	Cimarron, OK	2017	grain sorghum	36.73331N, -102.46633W	8/29/2017	0	47.52	47.52	108				1.08			397.44						0			0						0			0
North GP	Cimarron, OK	2017	grain sorghum	36.73331N, -102.46633W	9/14/2017	2.16	208.44	210.6	108				0			376.92						0			0						0			0
North GP	Cimarron, OK	2017	grain sorghum	36.73331N, -102.46633W	9/21/2017	7.56	88.56	96.12	108				1.08			326.16						0			0						0			0
North GP	Cimarron, OK	2017	grain sorghum	36.73331N, -102.46633W	10/2/2017	0	54	54	108				0			169.56						0			0						0			0
North GP	Cimarron, OK	2017	grain sorghum	36.75837N, -102.18235W	7/20/2017	0	0	0	108				0			0						0			0						0			0
North GP	Cimarron, OK	2017	grain sorghum	36.75837N, -102.18235W	8/16/2017	1.08	2.16	3.24	108				0			11.88						0			0						0			0
North GP	Cimarron, OK	2017	grain sorghum	36.75837N, -102.18235W	8/22/2017	0	33.48	33.48	108				0			155.52						1.08			0						0			0
North GP	Cimarron, OK	2017	grain sorghum	36.75837N, -102.18235W	8/29/2017	0	38.88	38.88	108				0			102.6						0			0						0			0
North GP	Cimarron, OK	2017	grain sorghum	36.75837N, -102.18235W	9/14/2017	3.24	355.32	358.56	108				1.08			212.76						0			0						0			0
North GP	Cimarron, OK	2017	grain sorghum	36.75837N, -102.18235W	9/21/2017	5.4	181.44	186.84	108				1.08			69.12						0			0						0			0
North GP	Cimarron, OK	2017	grain sorghum	36.75837N, -102.18235W	10/2/2017	9.72	98.28	108	108				3.24			111.24						0			0						0			0
North GP	Cimarron, OK	2017	grain sorghum	36.75837N, -102.18224W	7/12/2017	0	0	0	108				0			0						0			0						0			0
North GP	Cimarron, OK	2017	grain sorghum	36.76938N, -102.2641W	7/12/2017	0	0	0	108				0			0						0			0						0			0
North GP	Cimarron, OK	2017	grain sorghum	36.76938N, -102.2641W	7/20/2017	0	0	0	108				0			0						0			0						0			0
North GP	Cimarron, OK	2017	grain sorghum	36.76938N, -102.2641W	8/16/2017	0	2.16	2.16	108				0			6.48						1.08			0						3.24			0
North GP	Cimarron, OK	2017	grain sorghum	36.76938N, -102.2641W	8/22/2017	0	0	0	108				1.08			61.56						1.08			0						0			0
North GP	Cimarron, OK	2017	grain sorghum	36.76938N, -102.2641W	8/29/2017	0	19.44	19.44	108				0			140.4						0			0						0			0
North GP	Cimarron, OK	2017	grain sorghum	36.76938N, -102.2641W	9/14/2017	8.64	410.4	419.04	108				2.16			176.04						0			0						0			5.4
North GP	Cimarron, OK	2017	grain sorghum	36.76938N, -102.2641W	9/21/2017	2.16	68.04	70.2	108				0			222.48						0			0						0			0
North GP	Cimarron, OK	2017	grain sorghum	36.76938N, -102.2641W	10/2/2017	2.16	52.92	55.08	108				0			112.32						0			0						0			0
North GP	Cimarron, OK	2017	grain sorghum	36.76938N, -102.2641W	10/16/2017	2.16	24.84	27	108				1.08			37.8						1.08			0						0			0
South GP	Kiowa, OK	2018	grain sorghum	34.91353N, 98.82925W				24862	1296	19.1836	6	2	30	0.00120666	0.0231481	373	0.0150028	0.287809	403	0.0162095	0.310957	3	0.000120666	0.00231481	8	0.000321776	0.00617284	11	0.000442442	0.00848765	3	0.000120666	0.00231481	8	0.000321776	0.00617284	2018-07-11	2018-09-13	phok	Kiowa, OK	38401	1483	87263	44.0061	1.69946	66.2457	0.448071	78.5367	2018-07-11
South GP	Kiowa, OK	2018	grain sorghum	34.84433N, -99.0216W	7/11/2018	0	0	0	108				0			0						0			0						0			0
South GP	Kiowa, OK	2018	grain sorghum	34.84433N, -99.0216W	7/20/2018	0	0	0	108				0			0						0			0						0			0
South GP	Kiowa, OK	2018	grain sorghum	34.84433N, -99.0216W	7/31/2018	0	0	0	108				0			0						0			0						0			0
South GP	Kiowa, OK	2018	grain sorghum	34.84433N, -99.0216W	8/16/2018	1.08	21.6	22.68	108				0			0						0			0						0			0
South GP	Kiowa, OK	2018	grain sorghum	34.84433N, -99.0216W	8/27/2018	12.96	390.96	403.92	108				1.08			137.16						1.08			0						1.08			0
South GP	Kiowa, OK	2018	grain sorghum	34.84433N, -99.0216W	9/13/2018	2.16	61.56	63.72	108				0			0						0			0						0			0
South GP	Kiowa, OK	2018	grain sorghum	34.91353N, -98.82925W	7/11/2018	0	0	0	108				0			0						0			0						0			0
South GP	Kiowa, OK	2018	grain sorghum	34.91353N, -98.82925W	7/20/2018	0	0	0	108				0			0						0			0						0			0
South GP	Kiowa, OK	2018	grain sorghum	34.91353N, -98.82925W	7/31/2018	1.08	0	1.08	108				0			0						0			0						0			0
South GP	Kiowa, OK	2018	grain sorghum	34.91353N, -98.82925W	8/16/2018	74.52	400.68	475.2	108				0			0						2.16			0						0			4.32
South GP	Kiowa, OK	2018	grain sorghum	34.91353N, -98.82925W	8/27/2018	348.84	4731.48	5080.32	108				28.08			234.36						0			0						2.16			0
South GP	Kiowa, OK	2018	grain sorghum	34.91353N, -98.82925W	9/13/2018	521.64	18293	18814.7	108				1.08			1.08						0			4.32						0			3.24
North GP	Texas, OK	2018	grain sorghum	36.67876N, 101.339W				1725	540	3.19444	5	1	2	0.00115942	0.0037037	0	0	0	2	0.00115942	0.0037037	1	0.00057971	0.00185185	4	0.00231884	0.00740741	5	0.00289855	0.00925926	0	0	0	0	0	0	2018-07-11	2018-08-27	phok	Texas, OK	44378	2199	87235	50.8718	2.52078	37.0413	3.0137	78.5115	2018-07-11
North GP	Texas, OK	2018	grain sorghum	36.58993N, -101.59918W	7/11/2018	0	0	0	108				0			0						0			0						0			0
North GP	Texas, OK	2018	grain sorghum	36.58993N, -101.59918W	7/20/2018	0	0	0	108				0			0						0			0						0			0
North GP	Texas, OK	2018	grain sorghum	36.58993N, -101.59918W	7/31/2018	6.48	44.28	50.76	108				0			0						0			2.16						0			0
North GP	Texas, OK	2018	grain sorghum	36.58993N, -101.59918W	8/16/2018	39.96	1634.04	1674	108				2.16			0						1.08			0						0			0
North GP	Texas, OK	2018	grain sorghum	36.58993N, -101.59918W	8/27/2018	0	0	0	108				0			0						0			0						0			0
North GP	Cimarron, OK	2018	grain sorghum	36.72792N, 102.47385W				3374	1404	2.40313	7	2	0	0	0	89	0.0263782	0.0633903	89	0.0263782	0.0633903	0	0	0	8	0.00237107	0.00569801	8	0.00237107	0.00569801	0	0	0	1	0.000296384	0.000712251	2018-07-11	2018-09-13	phok	Cimarron, OK	36248	14627	87251	41.5445	16.7643	35.9503	0.787384	78.5259	2018-07-11
North GP	Cimarron, OK	2018	grain sorghum	36.76265N, -102.32303W	7/11/2018	0	0	0	108				0			0						0			0						0			0
North GP	Cimarron, OK	2018	grain sorghum	36.76265N, -102.32303W	7/20/2018	0	0	0	108				0			0						0			0						0			0
North GP	Cimarron, OK	2018	grain sorghum	36.76265N, -102.32303W	7/31/2018	0	11.88	11.88	108				0			0						0			1.08						0			0
North GP	Cimarron, OK	2018	grain sorghum	36.76265N, -102.32303W	8/16/2018	16.2	378	394.2	108				0			0						0			0						0			0
North GP	Cimarron, OK	2018	grain sorghum	36.76265N, -102.32303W	8/20/2018	46.44	1104.84	1151.28	108				0			0						0			0						0			0
North GP	Cimarron, OK	2018	grain sorghum	36.76265N, -102.32303W	9/13/2018	64.8	1631.88	1696.68	108				0			0						0			3.24						0			1.08
North GP	Cimarron, OK	2018	grain sorghum	36.76274N, -102.32322W	7/11/2018	0	0	0	108				0			0						0			0						0			0
North GP	Cimarron, OK	2018	grain sorghum	36.76274N, -102.32322W	7/20/2018	0	0	0	108				0			0						0			0						0			0
North GP	Cimarron, OK	2018	grain sorghum	36.76274N, -102.32322W	7/31/2018	0	0	0	108				0			0						0			0						0			0
North GP	Cimarron, OK	2018	grain sorghum	36.76274N, -102.32322W	8/16/2018	5.4	34.56	39.96	108				0			0						0			0						0			0
North GP	Cimarron, OK	2018	grain sorghum	36.76274N, -102.32322W	8/20/2018	1.08	2.16	3.24	108				0			0						0			0						0			0
North GP	Cimarron, OK	2018	grain sorghum	36.76274N, -102.32322W	8/27/2018	5.4	61.56	66.96	108				0			88.56						0			0						0			0
North GP	Cimarron, OK	2018	grain sorghum	36.76274N, -102.32322W	9/13/2018	3.24	6.48	9.72	108				0			0						0			0						0			0
North GP	Sumner, KS	2019	grain sorghum	37.05565N, 97.19477W				750	756	0.992063	7	1	8	0.0106667	0.010582	2	0.00266667	0.0026455	10	0.0133333	0.0132275	1	0.00133333	0.00132275	2	0.00266667	0.0026455	3	0.004	0.00396825	1	0.00133333	0.00132275	1	0.00133333	0.00132275	2018-07-11	2018-09-13	phok	Sumner, KS	53380	9455	87246	61.1833	10.8372	29.2369	0	78.5214	2018-07-11
North GP	Sumner, KS	2019	grain sorghum	37.05748N, -97.16533W	7/11/2018	0	0	0	108				0			0						0			0						0			0
North GP	Sumner, KS	2019	grain sorghum	37.05748N, -97.16533W	7/20/2018	0	0	0	108				0			0						0			0						0			0
North GP	Sumner, KS	2019	grain sorghum	37.05748N, -97.16533W	7/31/2018	0	1.08	1.08	108				0			0						0			0						0			0
North GP	Sumner, KS	2019	grain sorghum	37.05748N, -97.16533W	8/5/2018	24.84	18.36	43.2	108				0			0						0			1.08						0			0
North GP	Sumner, KS	2019	grain sorghum	37.05748N, -97.16533W	8/16/2018	28.08	209.52	237.6	108				0			0						1.08			0						0			1.08
North GP	Sumner, KS	2019	grain sorghum	37.05748N, -97.16533W	8/27/2018	45.36	400.68	446.04	108				8.64			2.16						0			0						0			0
North GP	Sumner, KS	2019	grain sorghum	37.05748N, -97.16533W	9/13/2018	10.8	10.8	21.6	108				0			0						0			0						1.08			0
North GP	Major, OK	2019	grain sorghum	36.3032N, 98.556W				411	768	0.535156	8	1	3	0.00729927	0.00390625	0	0	0	3	0.00729927	0.00390625	0	0	0	0	0	0	0	0	0	6	0.0145985	0.0078125	3	0.00729927	0.00390625	2019-07-17	2019-10-07	phok	Major, OK	46189	188	87238	52.946	0.215502	39.9161	0.0332424	78.5142	2019-07-17
North GP	Major, OK	2019	grain sorghum	36.3032N, -98.556W	7/17/2019	0	0	0	108				0			0						0			0						0			0
North GP	Major, OK	2019	grain sorghum	36.3032N, -98.556W	7/29/2019	0	0	0	108				0			0						0			0						0			0
North GP	Major, OK	2019	grain sorghum	36.3032N, -98.556W	8/13/2019	1.08	12.96	14.04	108				2.16			0						0			0						0			0
North GP	Major, OK	2019	grain sorghum	36.3032N, -98.556W	8/29/2019	0	3.24	3.24	108				0			0						0			0						0			2.16
North GP	Major, OK	2019	grain sorghum	36.3032N, -98.556W	9/5/2019	5.04	21.84	26.88	84				0			0						0			0						5.88			0.84
North GP	Major, OK	2019	grain sorghum	36.3032N, -98.556W	9/12/2019	5.88	17.64	23.52	84				0			0						0			0						0			0
North GP	Major, OK	2019	grain sorghum	36.3032N, -98.556W	9/23/2019	5.04	261.24	266.28	84				0.84			0						0			0						0			0
North GP	Major, OK	2019	grain sorghum	36.3032N, -98.556W	10/7/2019	0.84	75.6	76.44	84				0			0						0			0						0			0
North GP	Garfield, OK	2019	grain sorghum	36.21422N, 98.01362W				126	216	0.583333	2	1	8	0.0634921	0.037037	0	0	0	8	0.0634921	0.037037	0	0	0	0	0	0	0	0	0	0	0	0	0	0	0	2019-07-17	2019-07-29	phok	Garfield, OK	58917	966	87239	67.5352	1.1073	24.0833	0.0504362	78.5151	2019-07-17
North GP	Garfield, OK	2019	grain sorghum	36.3884N, -98.1092W	7/17/2019	0	6.48	6.48	108				0			0						0			0						0			0
North GP	Garfield, OK	2019	grain sorghum	36.3884N, -98.1092W	7/29/2019	1.08	118.8	119.88	108				7.56			0						0			0						0			0
North GP	Beaver, OK	2019	grain sorghum	36.52987N, 100.57195W				1180	2400	0.491667	8	5	5	0.00423729	0.00208333	0	0	0	5	0.00423729	0.00208333	0	0	0	2	0.00169492	0.000833333	2	0.00169492	0.000833333	0	0	0	2.5	0.00211864	0.00104167	2019-07-17	2019-10-07	phok	Beaver, OK	40842	11704	87254	46.8082	13.4137	9.15259	13.1639	78.5286	2019-07-17
North GP	Beaver, OK	2019	grain sorghum	36.5144N, -100.5199W	7/17/2019	0	0	0	108				0			0						0			0						0			0
North GP	Beaver, OK	2019	grain sorghum	36.5144N, -100.5199W	7/29/2019	0	0	0	108				0			0						0			0						0			0
North GP	Beaver, OK	2019	grain sorghum	36.5144N, -100.5199W	8/13/2019	0	0	0	108				0			0						0			0						0			0
North GP	Beaver, OK	2019	grain sorghum	36.5144N, -100.5199W	8/29/2019	1.68	26.88	28.56	84				0			0						0			0						0			0
North GP	Beaver, OK	2019	grain sorghum	36.5144N, -100.5199W	9/5/2019	11.76	45.36	57.12	84				0			0						0			0						0			1.68
North GP	Beaver, OK	2019	grain sorghum	36.5144N, -100.5199W	9/12/2019	1.68	10.08	11.76	84				3.36			0						0			0						0			0.84
North GP	Beaver, OK	2019	grain sorghum	36.5144N, -100.5199W	9/23/2019	6.72	22.68	29.4	84				0.84			0						0			0						0			0
North GP	Beaver, OK	2019	grain sorghum	36.5144N, -100.5199W	10/7/2019	0.84	10.08	10.92	84				0			0						0			0						0			0
North GP	Beaver, OK	2019	grain sorghum	36.54612N, -100.589177W	8/29/2019	1.68	10.08	11.76	84				0			0						0			0						0			0
North GP	Beaver, OK	2019	grain sorghum	36.54612N, -100.589177W	9/5/2019	10.92	41.16	52.08	84				0			0						0			0						0			0
North GP	Beaver, OK	2019	grain sorghum	36.54612N, -100.589177W	9/12/2019	4.2	20.16	24.36	84				0.84			0						0			0						0			0
North GP	Beaver, OK	2019	grain sorghum	36.54612N, -100.589177W	9/23/2019	3.36	9.24	12.6	84				0			0						0			0						0			0
North GP	Beaver, OK	2019	grain sorghum	36.54612N, -100.589177W	10/7/2019	3.36	15.12	18.48	84				0			0						0			0						0			0
North GP	Beaver, OK	2019	grain sorghum	36.549N, -100.5766W	7/17/2019	0	0	0	108				0			0						0			1.08						0			0
North GP	Beaver, OK	2019	grain sorghum	36.549N, -100.5766W	7/29/2019	0	1.08	1.08	108				0			0						0			0						0			0
North GP	Beaver, OK	2019	grain sorghum	36.549N, -100.5766W	8/13/2019	0	0	0	108				0			0						0			0						0			0
North GP	Beaver, OK	2019	grain sorghum	36.621028N, -100.091515W	9/5/2019	5.04	10.08	15.12	84				0			0						0			0						0			0
North GP	Beaver, OK	2019	grain sorghum	36.621028N, -100.091515W	9/12/2019	1.68	15.12	16.8	84				0			0						0			0						0			0
North GP	Beaver, OK	2019	grain sorghum	36.621028N, -100.091515W	9/23/2019	25.2	756	781.2	84				0			0						0			0						0			0
North GP	Beaver, OK	2019	grain sorghum	36.621028N, -100.091515W	10/7/2019	0.84	9.24	10.08	84				0			0						0			0						0			0
North GP	Beaver, OK	2019	grain sorghum	36.6753N, -100.3848W	7/17/2019	0	0	0	108				0			0						0			0						0			0
North GP	Beaver, OK	2019	grain sorghum	36.6753N, -100.3848W	7/29/2019	0	0	0	108				0			0						0			0						0			0
North GP	Beaver, OK	2019	grain sorghum	36.6753N, -100.3848W	8/13/2019	0	0	0	108				0			0						0			0						0			0
North GP	Beaver, OK	2019	grain sorghum	36.6753N, -100.3848W	8/29/2019	3.36	38.64	42	84				0			0						0			0						0			0
North GP	Beaver, OK	2019	grain sorghum	36.6753N, -100.3848W	9/5/2019	0.84	45.36	46.2	84				0			0						0			0						0			0
North GP	Beaver, OK	2019	grain sorghum	36.6753N, -100.3848W	9/12/2019	0	10.92	10.92	84				0			0						0			0						0			0
North GP	Texas, OK	2019	grain sorghum	36.67876N, 101.339W				4052	1740	2.32874	9	3	852	0.210267	0.489655	14	0.00345508	0.00804598	866	0.213722	0.497701	17	0.00419546	0.00977011	35	0.00863771	0.0201149	52	0.0128332	0.0298851	0	0	0	0	0	0	2019-07-17	2019-10-07	phok	Texas, OK	39098	4496	87235	44.8192	5.15389	20.0321	20.5995	78.5115	2019-07-17
North GP	Texas, OK	2019	grain sorghum	36.61321N, -101.134224W	8/29/2019	0.84	124.32	125.16	84				0			14.28						0			3.36						0			0
North GP	Texas, OK	2019	grain sorghum	36.61321N, -101.134224W	9/5/2019	0.84	686.28	687.12	84				0.84			0						1.68			4.2						0			0
North GP	Texas, OK	2019	grain sorghum	36.61321N, -101.134224W	9/12/2019	1.68	43.68	45.36	84				0			0						0			0						0			0
North GP	Texas, OK	2019	grain sorghum	36.61321N, -101.134224W	9/23/2019	1.68	10.08	11.76	84				0			0						0			0.84						0			0
North GP	Texas, OK	2019	grain sorghum	36.61321N, -101.134224W	10/7/2019	3.36	115.08	118.44	84				0.84			0						0			0						0			0
North GP	Texas, OK	2019	grain sorghum	36.670762N, -101.385025W	8/15/2019	85.32	2730.24	2815.56	108				848.88			0						3.24			8.64						0			0
North GP	Texas, OK	2019	grain sorghum	36.670762N, -101.385025W	8/29/2019	8.4	42.84	51.24	84				0			0						0			0						0			0
North GP	Texas, OK	2019	grain sorghum	36.670762N, -101.385025W	9/5/2019	3.36	94.92	98.28	84				0.84			0						11.76			0.84						0			0
North GP	Texas, OK	2019	grain sorghum	36.670762N, -101.385025W	9/12/2019	4.2	33.6	37.8	84				0.84			0						0			0						0			0
North GP	Texas, OK	2019	grain sorghum	36.670762N, -101.385025W	9/23/2019	0	1.68	1.68	84				0			0						0			0						0			0
North GP	Texas, OK	2019	grain sorghum	36.670762N, -101.385025W	10/7/2019	0	0.84	0.84	84				0			0						0			0						0			0
North GP	Texas, OK	2019	grain sorghum	36.7618N, -101.9243W	7/17/2019	0	0	0	108				0			0						0			0						0			0
North GP	Texas, OK	2019	grain sorghum	36.7618N, -101.9243W	7/29/2019	0	0	0	108				0			0						0			0						0			0
North GP	Texas, OK	2019	grain sorghum	36.7618N, -101.9243W	8/13/2019	0	0	0	108				0			0						0			0						0			0
North GP	Texas, OK	2019	grain sorghum	36.7618N, -101.9243W	8/29/2019	0	0	0	108				0			0						0			0						0			0
North GP	Texas, OK	2019	grain sorghum	36.7618N, -101.9243W	9/5/2019	0	5.88	5.88	84				0			0						0			0						0			0
North GP	Texas, OK	2019	grain sorghum	36.7618N, -101.9243W	9/12/2019	0	1.68	1.68	84				0			0						0			0						0			0
North GP	Texas, OK	2019	grain sorghum	36.7618N, -101.9243W	9/23/2019	0.84	50.4	51.24	84				0			0						0			0						0			0
North GP	Texas, OK	2019	grain sorghum	36.7618N, -101.9243W	10/7/2019	0	0	0	108				0			0						0			0						0			0
North GP	Cimarron, OK	2019	grain sorghum	36.72792N, 102.47385W				82	1512	0.0542328	9	2	0	0	0	0	0	0	0	0	0	0	0	0	0	0	0	0	0	0	0	0	0	6	0.0731707	0.00396825	2019-07-17	2019-10-09	phok	Cimarron, OK	46904	13666	87251	53.7576	15.6629	32.944	3.54036	78.5259	2019-07-17
North GP	Cimarron, OK	2019	grain sorghum	36.7618N, -102.0859W	7/17/2019	0	0	0	108				0			0						0			0						0			0
North GP	Cimarron, OK	2019	grain sorghum	36.7618N, -102.0859W	7/29/2019	0	0	0	108				0			0						0			0						0			0
North GP	Cimarron, OK	2019	grain sorghum	36.7618N, -102.0859W	8/13/2019	0	0	0	108				0			0						0			0						0			0
North GP	Cimarron, OK	2019	grain sorghum	36.7618N, -102.0859W	8/29/2019	0	0	0	108				0			0						0			0						0			0
North GP	Cimarron, OK	2019	grain sorghum	36.7618N, -102.0859W	9/5/2019	0	0	0	84				0			0						0			0						0			0
North GP	Cimarron, OK	2019	grain sorghum	36.7618N, -102.0859W	9/12/2019	0	0	0	84				0			0						0			0						0			0
North GP	Cimarron, OK	2019	grain sorghum	36.7618N, -102.0859W	9/23/2019	5.04	10.92	15.96	84				0			0						0			0						0			0
North GP	Cimarron, OK	2019	grain sorghum	36.7618N, -102.0859W	10/7/2019	0	0	0	84				0			0						0			0						0			0
North GP	Cimarron, OK	2019	grain sorghum	36.7632N, -102.212W	7/17/2019	0	0	0	108				0			0						0			0						0			0
North GP	Cimarron, OK	2019	grain sorghum	36.7632N, -102.212W	7/29/2019	0	0	0	108				0			0						0			0						0			0
North GP	Cimarron, OK	2019	grain sorghum	36.7632N, -102.212W	8/13/2019	0	0	0	108				0			0						0			0						0			0
North GP	Cimarron, OK	2019	grain sorghum	36.7632N, -102.212W	8/29/2019	0	0	0	84				0			0						0			0						0			0
North GP	Cimarron, OK	2019	grain sorghum	36.7632N, -102.212W	9/5/2019	0	12.6	12.6	84				0			0						0			0						0			0
North GP	Cimarron, OK	2019	grain sorghum	36.7632N, -102.212W	9/12/2019	1.68	1.68	3.36	84				0			0						0			0						0			5.88
North GP	Cimarron, OK	2019	grain sorghum	36.7632N, -102.212W	9/23/2019	5.88	12.6	18.48	84				0			0						0			0						0			0
North GP	Cimarron, OK	2019	grain sorghum	36.7632N, -102.212W	10/9/2019	0	0.84	0.84	84				0			0						0			0						0			0
South GP	Tillman, OK	2017	grain sorghum	34.40746N, 99.16803W				2002	324	6.17901	3	1	9	0.0044955	0.0277778	0	0	0	9	0.0044955	0.0277778	0	0	0	0	0	0	0	0	0	0	0	0	1	0.0004995	0.00308642	2017-08-30	2017-09-13	swok	Tillman, OK	65260	2135	87219	74.8231	2.44786	12.2187	5.46785	78.4971	2017-08-30
South GP	Tillman, OK	2017	grain sorghum	34.40746N, -99.16803W	8/30/2017	2.16	1.08	3.24	108				0			0						0			0						0			0
South GP	Tillman, OK	2017	grain sorghum	34.40746N, -99.16803W	9/5/2017	34.56	111.24	145.8	108				2.16			0						0			0						0			0
South GP	Tillman, OK	2017	grain sorghum	34.40746N, -99.16803W	9/13/2017	167.4	1685.88	1853.28	108				6.48			0						0			0						0			1.08
South GP	Jackson,OK	2017	grain sorghum	34.51436N, 99.26239W				4085	4103	0.995613	15	4	126	0.0308446	0.0307092	0	0	0	126	0.0308446	0.0307092	5	0.00122399	0.00121862	6	0.00146879	0.00146234	11	0.00269278	0.00268097	13	0.00318237	0.00316841	5	0.00122399	0.00121862	2017-05-31	2017-09-13	swok	Jackson,OK	66301	239	87230	76.0071	0.273988	6.32581	9.9358	78.507	2017-05-31
South GP	Jackson,OK	2017	grain sorghum	34.51436N, -99.26239W	5/31/2017	0	0	0	108				0			0						0			0						0			0
South GP	Jackson,OK	2017	grain sorghum	34.51436N, -99.26239W	6/6/2017	0	0	0	108				0			0						0			0						0			0
South GP	Jackson,OK	2017	grain sorghum	34.51436N, -99.26239W	6/14/2017	1.08	2.16	3.24	108				0			0						0			0						0			0
South GP	Jackson,OK	2017	grain sorghum	34.51436N, -99.26239W	6/19/2017	0	6.48	6.48	108				0			0						0			0						0			0
South GP	Jackson,OK	2017	grain sorghum	34.51436N, -99.26239W	6/27/2017	2.16	60.48	62.64	108				1.08			0						0			0						0			0
South GP	Jackson,OK	2017	grain sorghum	34.51436N, -99.26239W	7/6/2017	1.08	29.16	30.24	108				0			0						0			0						0			0
South GP	Jackson,OK	2017	grain sorghum	34.51436N, -99.26239W	7/13/2017	6.48	72.36	78.84	108				0			0						0			1.08						0			0
South GP	Jackson,OK	2017	grain sorghum	34.51436N, -99.26239W	7/19/2017	0	37.8	37.8	108				2.16			0						0			0						0			0
South GP	Jackson,OK	2017	grain sorghum	34.51436N, -99.26239W	7/26/2017	1.08	10.8	11.88	108				3.24			0						0			0						0			0
South GP	Jackson,OK	2017	grain sorghum	34.51436N, -99.26239W	8/2/2017	0	36.72	36.72	108				6.48			0						0			0						0			0
South GP	Jackson,OK	2017	grain sorghum	34.51436N, -99.26239W	8/9/2017	5.4	164.16	169.56	108				6.48			0						0			0						1.08			0
South GP	Jackson,OK	2017	grain sorghum	34.51436N, -99.26239W	8/18/2017	3.24	818.64	821.88	108				9.72			0						4.32			1.08						1.08			1.08
South GP	Jackson,OK	2017	grain sorghum	34.5707N, -99.27968W	5/31/2017	0	0	0	107				0			0						0			1.07						0			0
South GP	Jackson,OK	2017	grain sorghum	34.5707N, -99.27968W	6/6/2017	0	0	0	108				2.16			0						0			1.08						0			0
South GP	Jackson,OK	2017	grain sorghum	34.5707N, -99.27968W	6/14/2017	0	0	0	108				0			0						0			0						0			0
South GP	Jackson,OK	2017	grain sorghum	34.5707N, -99.27968W	6/19/2017	0	0	0	108				0			0						0			0						0			0
South GP	Jackson,OK	2017	grain sorghum	34.5707N, -99.27968W	6/27/2017	0	1.08	1.08	108				0			0						0			0						0			0
South GP	Jackson,OK	2017	grain sorghum	34.5707N, -99.27968W	7/6/2017	0	0	0	108				0			0						0			0						0			0
South GP	Jackson,OK	2017	grain sorghum	34.5707N, -99.27968W	7/13/2017	0	18.36	18.36	108				0			0						0			0						0			0
South GP	Jackson,OK	2017	grain sorghum	34.5707N, -99.27968W	7/19/2017	0	16.2	16.2	108				0			0						0			0						0			0
South GP	Jackson,OK	2017	grain sorghum	34.5707N, -99.27968W	7/26/2017	0	1.08	1.08	108				3.24			0						0			0						0			0
South GP	Jackson,OK	2017	grain sorghum	34.5707N, -99.27968W	8/2/2017	1.08	1.08	2.16	108				5.4			0						0			0						0			0
South GP	Jackson,OK	2017	grain sorghum	34.5707N, -99.27968W	8/9/2017	1.08	2.16	3.24	108				5.4			0						0			0						0			0
South GP	Jackson,OK	2017	grain sorghum	34.5707N, -99.27968W	8/18/2017	3.24	118.8	122.04	108				1.08			0						0			0						0			0
South GP	Jackson,OK	2017	grain sorghum	34.5845N, -99.28279W	7/13/2017	2.16	222.48	224.64	108				0			0						0			0						0			0
South GP	Jackson,OK	2017	grain sorghum	34.5845N, -99.28279W	7/19/2017	7.56	430.92	438.48	108				1.08			0						0			0						0			0
South GP	Jackson,OK	2017	grain sorghum	34.5845N, -99.28279W	7/26/2017	1.08	274.32	275.4	108				3.24			0						0			0						0			0
South GP	Jackson,OK	2017	grain sorghum	34.5845N, -99.28279W	8/2/2017	0	533.52	533.52	108				19.44			0						0			0						5.4			2.16
South GP	Jackson,OK	2017	grain sorghum	34.5845N, -99.28279W	8/9/2017	5.4	73.44	78.84	108				0			0						0			0						0			0
South GP	Jackson,OK	2017	grain sorghum	34.5845N, -99.28279W	8/18/2017	6.48	232.2	238.68	108				22.68			0						0			0						4.32			0
South GP	Jackson,OK	2017	grain sorghum	34.5845N, -99.28279W	8/30/2017	3.24	16.2	19.44	108				0			0						0			1.08						0			0
South GP	Jackson,OK	2017	grain sorghum	34.5845N, -99.28279W	9/5/2017	5.4	7.56	12.96	108				0			0						0			1.08						0			0
South GP	Jackson,OK	2017	grain sorghum	34.5845N, -99.28279W	9/13/2017	9.72	14.04	23.76	108				0			0						0			0						0			0
South GP	Jackson,OK	2017	grain sorghum	34.6435N, -99.24577W	7/13/2017	10.8	744.12	754.92	108				5.4			0						1.08			0						1.08			0
South GP	Jackson,OK	2017	grain sorghum	34.6435N, -99.24577W	7/19/2017	0	0	0	108				0			0						0			0						0			0
South GP	Jackson,OK	2017	grain sorghum	34.6435N, -99.24577W	8/2/2017	3.24	4.32	7.56	108				28.08			0						0			0						0			0
South GP	Jackson,OK	2017	grain sorghum	34.6435N, -99.24577W	8/9/2017	0	1.08	1.08	108				0			0						0			0						0			0
South GP	Jackson,OK	2017	grain sorghum	34.6435N, -99.24577W	8/18/2017	1.08	50.76	51.84	108				0			0						0			0						0			2.16
South GP	Kiowa, OK	2017	grain sorghum	34.91214N, 98.63917W				2634	2376	1.10859	13	3	10	0.00379651	0.00420875	1	0.000379651	0.000420875	11	0.00417616	0.00462963	2	0.000759301	0.000841751	27	0.0102506	0.0113636	29	0.0110099	0.0122054	1	0.000379651	0.000420875	0	0	0	2017-05-31	2017-08-30	swok	Kiowa,OK	34392	7594	87263	39.4119	8.70243	22.5009	25.4793	78.5367	2017-05-31
South GP	Kiowa, OK	2017	grain sorghum	34.67688N, -98.86193W	6/14/2017	0	0	0	108				0			0						0			0						0			0
South GP	Kiowa, OK	2017	grain sorghum	34.67688N, -98.86193W	6/19/2017	0	4.32	4.32	108				0			0						0			0						0			0
South GP	Kiowa, OK	2017	grain sorghum	34.67688N, -98.86193W	6/27/2017	1.08	14.04	15.12	108				0			0						0			0						0			0
South GP	Kiowa, OK	2017	grain sorghum	34.67688N, -98.86193W	7/6/2017	1.08	14.04	15.12	108				0			0						0			0						0			0
South GP	Kiowa, OK	2017	grain sorghum	34.90044N, -98.86384W	5/31/2017	3.24	5.4	8.64	108				0			0						0			0						0			0
South GP	Kiowa, OK	2017	grain sorghum	34.90044N, -98.86384W	6/6/2017	0	0	0	108				0			0						1.08			1.08						0			0
South GP	Kiowa, OK	2017	grain sorghum	34.90044N, -98.86384W	6/14/2017	0	0	0	108				0			0						0			1.08						0			0
South GP	Kiowa, OK	2017	grain sorghum	34.90044N, -98.86384W	6/19/2017	1.08	3.24	4.32	108				0			0						0			0						0			0
South GP	Kiowa, OK	2017	grain sorghum	34.90044N, -98.86384W	6/27/2017	6.48	50.76	57.24	108				2.16			0						0			0						1.08			0
South GP	Kiowa, OK	2017	grain sorghum	34.90044N, -98.86384W	7/6/2017	2.16	56.16	58.32	108				1.08			0						0			1.08						0			0
South GP	Kiowa, OK	2017	grain sorghum	34.90044N, -98.86384W	7/13/2017	4.32	89.64	93.96	108				5.4			0						0			18.36						0			0
South GP	Kiowa, OK	2017	grain sorghum	34.90044N, -98.86384W	7/19/2017	2.16	34.56	36.72	108				0			0						0			2.16						0			0
South GP	Kiowa, OK	2017	grain sorghum	34.90044N, -98.86384W	7/26/2017	0	0	0	108				0			0						0			2.16						0			0
South GP	Kiowa, OK	2017	grain sorghum	34.90044N, -98.86384W	8/2/2017	0	59.4	59.4	108				0			0						0			1.08						0			0
South GP	Kiowa, OK	2017	grain sorghum	34.90044N, -98.86384W	8/9/2017	2.16	32.4	34.56	108				0			0						0			0						0			0
South GP	Kiowa, OK	2017	grain sorghum	34.90044N, -98.86384W	8/18/2017	21.6	135	156.6	108				0			0						0			0						0			0
South GP	Kiowa, OK	2017	grain sorghum	34.90044N, -98.86384W	8/30/2017	395.28	1684.8	2080.08	108				0			0						1.08			0						0			0
South GP	Kiowa, OK	2017	grain sorghum	34.91214N, -98.63917W	5/31/2017	0	0	0	108				0			0						0			0						0			0
South GP	Kiowa, OK	2017	grain sorghum	34.91214N, -98.63917W	6/6/2017	0	0	0	108				0			1.08						0			0						0			0
South GP	Kiowa, OK	2017	grain sorghum	34.91214N, -98.63917W	6/14/2017	0	0	0	108				0			0						0			0						0			0
South GP	Kiowa, OK	2017	grain sorghum	34.91214N, -98.63917W	6/19/2017	1.08	2.16	3.24	108				0			0						0			0						0			0
South GP	Kiowa, OK	2017	grain sorghum	34.91214N, -98.63917W	6/27/2017	0	6.48	6.48	108				1.08			0						0			0						0			0
South GP	Caddo,OK	2017	grain sorghum	34.98545N, 98.60335W				3708	1512	2.45238	14	1	21	0.00566343	0.0138889	0	0	0	21	0.00566343	0.0138889	9	0.00242718	0.00595238	0	0	0	9	0.00242718	0.00595238	0	0	0	1	0.000269687	0.000661376	2017-05-31	2017-09-05	swok	Caddo,OK	46643	780	87239	53.4658	0.894096	39.3402	0.179965	78.5151	2017-05-31
South GP	Caddo,OK	2017	grain sorghum	34.98545N, -98.60335W	5/31/2017	1.08	5.4	6.48	108				0			0						0			0						0			0
South GP	Caddo,OK	2017	grain sorghum	34.98545N, -98.60335W	6/6/2017	1.08	1.08	2.16	108				2.16			0						0			0						0			0
South GP	Caddo,OK	2017	grain sorghum	34.98545N, -98.60335W	6/14/2017	0	12.96	12.96	108				0			0						0			0						0			0
South GP	Caddo,OK	2017	grain sorghum	34.98545N, -98.60335W	6/19/2017	2.16	5.4	7.56	108				0			0						0			0						0			0
South GP	Caddo,OK	2017	grain sorghum	34.98545N, -98.60335W	6/27/2017	0	1.08	1.08	108				2.16			0						0			0						0			0
South GP	Caddo,OK	2017	grain sorghum	34.98545N, -98.60335W	7/6/2017	2.16	65.88	68.04	108				1.08			0						0			0						0			1.08
South GP	Caddo,OK	2017	grain sorghum	34.98545N, -98.60335W	7/13/2017	0	5.4	5.4	108				5.4			0						0			0						0			0
South GP	Caddo,OK	2017	grain sorghum	34.98545N, -98.60335W	7/19/2017	0	0	0	108				0			0						0			0						0			0
South GP	Caddo,OK	2017	grain sorghum	34.98545N, -98.60335W	7/26/2017	0	0	0	108				0			0						0			0						0			0
South GP	Caddo,OK	2017	grain sorghum	34.98545N, -98.60335W	8/2/2017	0	1.08	1.08	108				1.08			0						0			0						0			0
South GP	Caddo,OK	2017	grain sorghum	34.98545N, -98.60335W	8/9/2017	4.32	3.24	7.56	108				2.16			0						0			0						0			0
South GP	Caddo,OK	2017	grain sorghum	34.98545N, -98.60335W	8/18/2017	59.4	625.32	684.72	108				0			0						1.08			0						0			0
South GP	Caddo,OK	2017	grain sorghum	34.98545N, -98.60335W	8/30/2017	63.72	681.48	745.2	108				0			0						1.08			0						0			0
South GP	Caddo,OK	2017	grain sorghum	34.98545N, -98.60335W	9/5/2017	225.72	1939.68	2165.4	108				6.48			0						6.48			0						0			0
North GP	Canadian,OK	2017	grain sorghum	35.4653N, 97.8741W				75265	540	139.38	3	2	25	0.00033216	0.0462963	8	0.000106291	0.0148148	33	0.000438451	0.0611111	64	0.000850329	0.118519	2	2.65728e-05	0.0037037	66	0.000876902	0.122222	70	0.000930047	0.12963	2	2.65728e-05	0.0037037	2017-08-30	2017-09-13	swok	Canadian,OK	53230	2546	87247	61.0107	2.91815	25.9665	0	78.5223	2017-08-30
North GP	Canadian,OK	2017	grain sorghum	35.4653N, -97.8741W	8/30/2017	2425.68	53602.6	56028.2	108				2.16			0						7.56			0						14.04			1.08
North GP	Canadian,OK	2017	grain sorghum	35.4653N, -97.8741W	9/5/2017	2444.04	14776.6	17220.6	108				16.2			7.56						48.6			2.16						16.2			1.08
North GP	Canadian,OK	2017	grain sorghum	35.46713N, -98.07616W	8/30/2017	7.56	975.24	982.8	108				1.08			0						0			0						34.56			0
North GP	Canadian,OK	2017	grain sorghum	35.46713N, -98.07616W	9/5/2017	54	924.48	978.48	108				5.4			0						6.48			0						5.4			0
North GP	Canadian,OK	2017	grain sorghum	35.46713N, -98.07616W	9/13/2017	3.24	50.76	54	108				0			0						1.08			0						0			0
South GP	Tillman, OK	2018	grain sorghum	34.40746N, 99.16803W				5678	1836	3.09259	10	3	0	0	0	0	0	0	0	0	0	9	0.00158507	0.00490196	8	0.00140895	0.0043573	17	0.00299401	0.00925926	2	0.000352237	0.00108932	7	0.00123283	0.00381264	2018-05-30	2018-08-17	swok	Tillman, OK	67826	787	87219	77.7652	0.902326	12.182	5.1858	78.4971	2018-05-30
South GP	Tillman, OK	2018	grain sorghum	34.4208N, -99.185W	5/30/2018	0	0	0	108				0			0						0			0						0			0
South GP	Tillman, OK	2018	grain sorghum	34.4208N, -99.185W	6/6/2018	0	0	0	108				0			0						0			0						0			0
South GP	Tillman, OK	2018	grain sorghum	34.4208N, -99.185W	6/13/2018	0	0	0	108				0			0						0			0						0			0
South GP	Tillman, OK	2018	grain sorghum	34.4208N, -99.185W	6/21/2018	0	0	0	108				0			0						0			0						0			0
South GP	Tillman, OK	2018	grain sorghum	34.4208N, -99.185W	6/27/2018	0	0	0	108				0			0						0			0						0			0
South GP	Tillman, OK	2018	grain sorghum	34.4415N, -99.1333W	6/21/2018	0	0	0	108				0			0						0			0						0			0
South GP	Tillman, OK	2018	grain sorghum	34.4415N, -99.1333W	6/27/2018	0	7.56	7.56	108				0			0						0			0						0			0
South GP	Tillman, OK	2018	grain sorghum	34.4415N, -99.1333W	7/2/2018	81	628.56	709.56	108				0			0						0			2.16						0			0
South GP	Tillman, OK	2018	grain sorghum	34.4415N, -99.1333W	7/12/2018	77.76	507.6	585.36	108				0			0						0			0						0			1.08
South GP	Tillman, OK	2018	grain sorghum	34.4415N, -99.1333W	7/18/2018	1.08	1905.12	1906.2	108				0			0						1.08			0						0			2.16
South GP	Tillman, OK	2018	grain sorghum	34.4415N, -99.1333W	8/1/2018	20.52	1021.68	1042.2	108				0			0						0			2.16						0			0
South GP	Tillman, OK	2018	grain sorghum	34.4415N, -99.1333W	8/17/2018	33.48	1393.2	1426.68	108				0			0						7.56			0						2.16			3.24
South GP	Tillman, OK	2018	grain sorghum	34.4569N, -99.2024W	5/30/2018	0	0	0	108				0			0						0			0						0			0
South GP	Tillman, OK	2018	grain sorghum	34.4569N, -99.2024W	6/6/2018	0	0	0	108				0			0						0			0						0			0
South GP	Tillman, OK	2018	grain sorghum	34.4569N, -99.2024W	6/13/2018	0	0	0	108				0			0						0			0						0			0
South GP	Tillman, OK	2018	grain sorghum	34.4569N, -99.2024W	6/21/2018	0	0	0	108				0			0						0			0						0			0
South GP	Tillman, OK	2018	grain sorghum	34.4569N, -99.2024W	6/27/2018	0	0	0	108				0			0						0			0						0			0
South GP	Jackson,OK	2018	grain sorghum	34.51436N, 99.26239W				11	972	0.0113169	9	1	0	0	0	0	0	0	0	0	0	0	0	0	0	0	0	0	0	0	0	0	0	0	0	0	2018-05-30	2018-08-01	swok	Jackson,OK	68383	357	87230	78.3939	0.409263	6.15385	10.0997	78.507	2018-05-30
South GP	Jackson,OK	2018	grain sorghum	34.5796N, -99.2635W	5/30/2018	0	0	0	108				0			0						0			0						0			0
South GP	Jackson,OK	2018	grain sorghum	34.5796N, -99.2635W	6/6/2018	0	0	0	108				0			0						0			0						0			0
South GP	Jackson,OK	2018	grain sorghum	34.5796N, -99.2635W	6/13/2018	0	0	0	108				0			0						0			0						0			0
South GP	Jackson,OK	2018	grain sorghum	34.5796N, -99.2635W	6/21/2018	0	0	0	108				0			0						0			0						0			0
South GP	Jackson,OK	2018	grain sorghum	34.5796N, -99.2635W	6/27/2018	0	0	0	108				0			0						0			0						0			0
South GP	Jackson,OK	2018	grain sorghum	34.5796N, -99.2635W	7/2/2018	0	0	0	108				0			0						0			0						0			0
South GP	Jackson,OK	2018	grain sorghum	34.5796N, -99.2635W	7/12/2018	4.32	3.24	7.56	108				0			0						0			0						0			0
South GP	Jackson,OK	2018	grain sorghum	34.5796N, -99.2635W	7/18/2018	0	0	0	108				0			0						0			0						0			0
South GP	Jackson,OK	2018	grain sorghum	34.5796N, -99.2635W	8/1/2018	2.16	1.08	3.24	108				0			0						0			0						0			0
South GP	Kiowa, OK	2018	grain sorghum	34.91214N, 98.63917W				1344	3132	0.429119	10	7	1	0.000744048	0.000319285	0	0	0	1	0.000744048	0.000319285	0	0	0	7	0.00520833	0.00223499	7	0.00520833	0.00223499	1	0.000744048	0.000319285	0	0	0	2018-05-30	2018-08-17	swok	Kiowa,OK	38401	1483	87263	44.0061	1.69946	19.8217	28.2227	78.5367	2018-05-30
South GP	Kiowa, OK	2018	grain sorghum	34.6356N, -98.9661W	5/30/2018	0	0	0	108				0			0						0			0						0			0
South GP	Kiowa, OK	2018	grain sorghum	34.6356N, -98.9661W	6/6/2018	0	0	0	108				0			0						0			0						0			0
South GP	Kiowa, OK	2018	grain sorghum	34.6356N, -98.9661W	6/13/2018	0	15.12	15.12	108				0			0						0			1.08						0			0
South GP	Kiowa, OK	2018	grain sorghum	34.6356N, -98.9661W	6/21/2018	0	1.08	1.08	108				0			0						0			0						0			0
South GP	Kiowa, OK	2018	grain sorghum	34.6356N, -98.9661W	6/27/2018	0	0	0	108				0			0						0			0						0			0
South GP	Kiowa, OK	2018	grain sorghum	34.6356N, -98.9661W	7/2/2018	0	0	0	108				0			0						0			0						0			0
South GP	Kiowa, OK	2018	grain sorghum	34.6671N, -99.0275W	5/30/2018	0	0	0	108				0			0						0			0						0			0
South GP	Kiowa, OK	2018	grain sorghum	34.6671N, -99.0275W	6/6/2018	0	0	0	108				0			0						0			0						0			0
South GP	Kiowa, OK	2018	grain sorghum	34.8164N, -98.8789W	5/30/2018	0	0	0	108				0			0						0			0						0			0
South GP	Kiowa, OK	2018	grain sorghum	34.8164N, -98.8789W	6/6/2018	0	0	0	108				0			0						0			0						0			0
South GP	Kiowa, OK	2018	grain sorghum	34.84425N, -99.02218W	6/27/2018	0	0	0	108				0			0						0			0						0			0
South GP	Kiowa, OK	2018	grain sorghum	34.84425N, -99.02218W	7/2/2018	0	0	0	108				0			0						0			0						0			0
South GP	Kiowa, OK	2018	grain sorghum	34.84425N, -99.02218W	7/12/2018	0	69.12	69.12	108				0			0						0			0						0			0
South GP	Kiowa, OK	2018	grain sorghum	34.84425N, -99.02218W	7/18/2018	0	37.8	37.8	108				0			0						0			0						0			0
South GP	Kiowa, OK	2018	grain sorghum	34.84425N, -99.02218W	8/1/2018	1.08	7.56	8.64	108				0			0						0			0						0			0
South GP	Kiowa, OK	2018	grain sorghum	34.9135N, -98.8292W	6/13/2018	0	6.48	6.48	108				0			0						0			0						0			0
South GP	Kiowa, OK	2018	grain sorghum	34.9135N, -98.8292W	6/21/2018	0	5.4	5.4	108				0			0						0			0						0			0
South GP	Kiowa, OK	2018	grain sorghum	34.9722N, -99.04462W	6/27/2018	0	0	0	108				0			0						0			1.08						0			0
South GP	Kiowa, OK	2018	grain sorghum	34.9722N, -99.04462W	7/2/2018	2.16	1.08	3.24	108				0			0						0			1.08						0			0
South GP	Kiowa, OK	2018	grain sorghum	34.9722N, -99.04462W	7/12/2018	6.48	18.36	24.84	108				0			0						0			0						0			0
South GP	Kiowa, OK	2018	grain sorghum	34.9722N, -99.04462W	7/18/2018	1.08	401.76	402.84	108				0			0						0			0						0			0
South GP	Kiowa, OK	2018	grain sorghum	34.9722N, -99.04462W	8/1/2018	0	1.08	1.08	108				0			0						0			1.08						0			0
South GP	Kiowa, OK	2018	grain sorghum	34.9722N, -99.04462W	8/17/2018	2.16	25.92	28.08	108				0			0						0			0						1.08			0
South GP	Kiowa, OK	2018	grain sorghum	35.1162N, -98.8657W	6/27/2018	0	0	0	108				0			0						0			0						0			0
South GP	Kiowa, OK	2018	grain sorghum	35.1162N, -98.8657W	7/2/2018	1.08	0	1.08	108				0			0						0			0						0			0
South GP	Kiowa, OK	2018	grain sorghum	35.1162N, -98.8657W	7/12/2018	1.08	1.08	2.16	108				0			0						0			0						0			0
South GP	Kiowa, OK	2018	grain sorghum	35.1162N, -98.8657W	7/18/2018	2.16	46.44	48.6	108				0			0						0			0						0			0
South GP	Kiowa, OK	2018	grain sorghum	35.1162N, -98.8657W	8/1/2018	5.4	17.28	22.68	108				0			0						0			0						0			0
South GP	Kiowa, OK	2018	grain sorghum	35.1162N, -98.8657W	8/17/2018	22.68	642.6	665.28	108				1.08			0						0			0						0			0
South GP	Caddo,OK	2018	grain sorghum	34.98545N, 98.60335W				11	432	0.025463	4	1	0	0	0	0	0	0	0	0	0	0	0	0	0	0	0	0	0	0	0	0	0	0	0	0	2018-05-30	2018-06-21	swok	Caddo,OK	47255	781	87239	54.1673	0.895242	38.0323	0.88951	78.5151	2018-05-30
South GP	Caddo,OK	2018	grain sorghum	35.1896N, -98.5953W	5/30/2018	0	0	0	108				0			0						0			0						0			0
South GP	Caddo,OK	2018	grain sorghum	35.1896N, -98.5953W	6/6/2018	0	0	0	108				0			0						0			0						0			0
South GP	Caddo,OK	2018	grain sorghum	35.1896N, -98.5953W	6/13/2018	0	0	0	108				0			0						0			0						0			0
South GP	Caddo,OK	2018	grain sorghum	35.1896N, -98.5953W	6/21/2018	0	10.8	10.8	108				0			0						0			0						0			0
North GP	Garfield, OK	2018	grain sorghum	36.21422N, 98.01362W				10260	588	17.449	5	2	24	0.00233918	0.0408163	0	0	0	24	0.00233918	0.0408163	9	0.000877193	0.0153061	4	0.000389864	0.00680272	13	0.00126706	0.0221088	1	9.74659e-05	0.00170068	0	0	0	2018-07-02	2018-08-17	swok	Garfield, OK	57458	734	87239	65.8627	0.841367	24.3767	0.00229255	78.5151	2018-07-02
North GP	Garfield, OK	2018	grain sorghum	36.43372N, -97.60122W	7/2/2018	0	0	0	108				0			0						0			0						0			0
North GP	Garfield, OK	2018	grain sorghum	36.43372N, -97.60122W	7/12/2018	1.08	105.84	106.92	108				0			0						0			0						0			0
North GP	Garfield, OK	2018	grain sorghum	36.43372N, -97.60122W	7/18/2018	0	43.2	43.2	108				0			0						0			0						0			0
North GP	Garfield, OK	2018	grain sorghum	36.43372N, -97.60122W	8/1/2018	1.08	101.52	102.6	108				0			0						0			0						0			0
North GP	Garfield, OK	2018	grain sorghum	36.43372N, -97.60122W	8/17/2018	1295.04	8712	10007	48				24			0						8.64			1.92						0.96			0
North GP	Garfield, OK	2018	grain sorghum	36.53482N, -97.62293W	7/2/2018	0	0	0	108				0			0						0			0						0			0
South GP	Tillman, OK	2019	grain sorghum	34.40746N, 99.16803W				8405	288	29.184	3	1	379	0.0450922	1.31597	0	0	0	379	0.0450922	1.31597	37	0.00440214	0.128472	8	0.000951814	0.0277778	45	0.00535396	0.15625	1	0.000118977	0.00347222	28	0.00333135	0.0972222	2019-07-03	2019-07-15	swok	Tillman, OK	66079	3272	87219	75.7622	3.75148	12.7908	4.81661	78.4971	2019-07-03
South GP	Tillman, OK	2019	grain sorghum	34.4414N, -99.1333W	7/3/2019	8.64	1379.16	1387.8	108				33.48			0						4.32			4.32						0			0
South GP	Tillman, OK	2019	grain sorghum	34.4414N, -99.1333W	7/10/2019	52.92	3270.24	3323.16	108				99.36			0						12.96			1.08						1.08			11.88
South GP	Tillman, OK	2019	grain sorghum	34.4414N, -99.1333W	7/15/2019	149.04	3545.28	3694.32	72				246.24			0						19.44			0.72						0			15.84
South GP	Jackson,OK	2019	grain sorghum	34.51436N, 99.26239W				21954	1620	13.5519	8	3	495	0.0225471	0.305556	0	0	0	495	0.0225471	0.305556	1	4.55498e-05	0.000617284	10	0.000455498	0.00617284	11	0.000501048	0.00679012	0	0	0	1	4.55498e-05	0.000617284	2019-06-24	2019-08-15	swok	Jackson,OK	67530	639	87230	77.416	0.732546	7.33234	10.1135	78.507	2019-06-24
South GP	Jackson,OK	2019	grain sorghum	34.725167N, -99.393167W	6/24/2019	0	0	0	108				0			0						0			0						0			0
South GP	Jackson,OK	2019	grain sorghum	34.725167N, -99.393167W	7/3/2019	4.32	5.4	9.72	108				0			0						0			0						0			0
South GP	Jackson,OK	2019	grain sorghum	34.725167N, -99.393167W	7/10/2019	6.48	12.96	19.44	108				0			0						0			0						0			0
South GP	Jackson,OK	2019	grain sorghum	34.725167N, -99.393167W	7/15/2019	11.88	180.36	192.24	108				0			0						0			0						0			0
South GP	Jackson,OK	2019	grain sorghum	34.725167N, -99.393167W	7/24/2019	20.52	702	722.52	108				8.64			0						0			1.08						0			0
South GP	Jackson,OK	2019	grain sorghum	34.725167N, -99.393167W	8/1/2019	254.88	5509.08	5763.96	108				14.04			0						0			0						0			0
South GP	Jackson,OK	2019	grain sorghum	34.725167N, -99.393167W	8/5/2019	321.84	5388.12	5709.96	108				141.48			0						0			1.08						0			0
South GP	Jackson,OK	2019	grain sorghum	34.7471N, -99.4053W	8/1/2019	137.16	667.44	804.6	108				0			0						0			0						0			0
South GP	Jackson,OK	2019	grain sorghum	34.7471N, -99.4053W	8/5/2019	207.36	522.72	730.08	108				20.52			0						0			0						0			0
South GP	Jackson,OK	2019	grain sorghum	34.7471N, -99.4053W	8/15/2019	275.4	636.12	911.52	108				262.44			0						1.08			1.08						0			0
South GP	Jackson,OK	2019	grain sorghum	34.761833N, -99.405467W	6/24/2019	0	0	0	108				0			0						0			2.16						0			0
South GP	Jackson,OK	2019	grain sorghum	34.761833N, -99.405467W	7/3/2019	0	68.04	68.04	108				0			0						0			0						0			0
South GP	Jackson,OK	2019	grain sorghum	34.761833N, -99.405467W	7/10/2019	4.32	352.08	356.4	108				0			0						0			0						0			0
South GP	Jackson,OK	2019	grain sorghum	34.761833N, -99.405467W	7/15/2019	61.56	777.6	839.16	108				0			0						0			0						0			0
South GP	Jackson,OK	2019	grain sorghum	34.761833N, -99.405467W	7/24/2019	289.44	5537.16	5826.6	108				47.52			0						0			0						0			1.08
South GP	Greer,OK	2019	grain sorghum	34.791633N, 99.405867W				5540	540	10.2593	5	1	29	0.00523466	0.0537037	0	0	0	29	0.00523466	0.0537037	1	0.000180505	0.00185185	2	0.000361011	0.0037037	3	0.000541516	0.00555556	0	0	0	1	0.000180505	0.00185185	2019-06-24	2019-07-24	swok	Greer,OK	65649	2656	87255	75.2381	3.04395	0.068764	17.7262	78.5295	2019-06-24
South GP	Greer,OK	2019	grain sorghum	34.791633N, -99.405867W	6/24/2019	0	0	0	108				0			0						0			0						0			0
South GP	Greer,OK	2019	grain sorghum	34.791633N, -99.405867W	7/3/2019	1.08	16.2	17.28	108				0			0						0			1.08						0			0
South GP	Greer,OK	2019	grain sorghum	34.791633N, -99.405867W	7/10/2019	2.16	59.4	61.56	108				0			0						0			0						0			0
South GP	Greer,OK	2019	grain sorghum	34.791633N, -99.405867W	7/15/2019	38.88	359.64	398.52	108				0			0						0			0						0			0
South GP	Greer,OK	2019	grain sorghum	34.791633N, -99.405867W	7/24/2019	238.68	4823.28	5061.96	108				29.16			0						1.08			0						0			1.08
South GP	Caddo,OK	2019	grain sorghum	34.98545N, 98.60335W				2616	840	3.11429	8	1	71	0.0271407	0.0845238	2	0.000764526	0.00238095	73	0.0279052	0.0869048	3	0.00114679	0.00357143	4	0.00152905	0.0047619	7	0.00267584	0.00833333	1	0.000382263	0.00119048	4	0.00152905	0.0047619	2019-07-03	2019-08-28	swok	Caddo,OK	47419	1660	87239	54.3553	1.90282	39.7643	0.826465	78.5151	2019-07-03
South GP	Caddo,OK	2019	grain sorghum	34.8953N, -98.4269W	7/3/2019	0	0	0	108				0			0						0			0						0			0
South GP	Caddo,OK	2019	grain sorghum	34.8953N, -98.4269W	7/10/2019	1.08	230.04	231.12	108				1.08			0						0			0						1.08			0
South GP	Caddo,OK	2019	grain sorghum	34.8953N, -98.4269W	7/15/2019	2.16	168.48	170.64	108				1.08			0						0			0						0			0
South GP	Caddo,OK	2019	grain sorghum	34.8953N, -98.4269W	7/24/2019	0	273.24	273.24	108				0			0						0			0						0			0
South GP	Caddo,OK	2019	grain sorghum	34.8953N, -98.4269W	8/1/2019	4.32	617.76	622.08	108				24.84			2.16						2.16			0						0			0
South GP	Caddo,OK	2019	grain sorghum	34.8953N, -98.4269W	8/5/2019	4.32	914.76	919.08	108				4.32			0						1.08			0						0			0
South GP	Caddo,OK	2019	grain sorghum	34.8953N, -98.4269W	8/15/2019	0	249.48	249.48	108				39.96			0						0			1.08						0			3.24
South GP	Caddo,OK	2019	grain sorghum	34.8953N, -98.4269W	8/28/2019	0	150.36	150.36	84				0			0						0			0.84						0			0.84
South GP	Grady, OK	2019	grain sorghum	35.043858N, 97.915437W				15460	840	18.4048	8	1	704	0.0455369	0.838095	0	0	0	704	0.0455369	0.838095	10	0.000646831	0.0119048	2	0.000129366	0.00238095	12	0.000776197	0.0142857	0	0	0	5	0.000323415	0.00595238	2019-07-03	2019-08-28	swok	Grady, OK	26349	240	87229	30.2067	0.275138	29.8605	0.23616	78.5061	2019-07-03
South GP	Grady, OK	2019	grain sorghum	35.043858N, -97.915437W	7/3/2019	0	0	0	108				0			0						0			0						0			0
South GP	Grady, OK	2019	grain sorghum	35.043858N, -97.915437W	7/10/2019	0	36.72	36.72	108				3.24			0						1.08			0						0			0
South GP	Grady, OK	2019	grain sorghum	35.043858N, -97.915437W	7/15/2019	4.32	378	382.32	108				18.36			0						0			0						0			0
South GP	Grady, OK	2019	grain sorghum	35.043858N, -97.915437W	7/24/2019	0	8222.04	8222.04	108				0			0						0			0						0			0
South GP	Grady, OK	2019	grain sorghum	35.043858N, -97.915437W	8/1/2019	55.08	1909.44	1964.52	108				195.48			0						0			0						0			0
South GP	Grady, OK	2019	grain sorghum	35.043858N, -97.915437W	8/5/2019	36.72	4029.48	4066.2	108				299.16			0						8.64			0						0			3.24
South GP	Grady, OK	2019	grain sorghum	35.043858N, -97.915437W	8/15/2019	1.08	787.32	788.4	108				187.92			0						0			1.08						0			2.16
South GP	Grady, OK	2019	grain sorghum	35.043858N, -97.915437W	8/28/2019	0	0	0	84				0			0						0			0						0			0
North GP	Oldham, TX	2017	grain sorghum	35.19891N, 102.33038W				21523	2112	10.1908	11	2	1	4.64619e-05	0.000473485	13	0.000604005	0.0061553	14	0.000650467	0.00662879	12	0.000557543	0.00568182	16	0.000743391	0.00757576	28	0.00130093	0.0132576	0	0	0	1	4.64619e-05	0.000473485	2017-07-27	2017-09-19	wtex	Oldham, TX	32619	3080	87228	37.3951	3.53098	56.7937	0.26253	78.5052	2017-07-27
North GP	Oldham, TX	2017	grain sorghum	35.19891N, -102.33038W	7/27/2017	0	0	0					0			0						0			5.76						0			0
North GP	Oldham, TX	2017	grain sorghum	35.19891N, -102.33038W	8/3/2017	0	0	0					0			0						0			0						0			0
North GP	Oldham, TX	2017	grain sorghum	35.19891N, -102.33038W	8/10/2017	0	0	0					0			0						0			2.88						0			0
North GP	Oldham, TX	2017	grain sorghum	35.19891N, -102.33038W	8/18/2017	0	48	48					0			0						0			0						0			0
North GP	Oldham, TX	2017	grain sorghum	35.19891N, -102.33038W	8/22/2017	21.12	364.8	385.92					0			0						0			0.96						0			0
North GP	Oldham, TX	2017	grain sorghum	35.19891N, -102.33038W	8/24/2017	48.96	1265.28	1314.24					0.96			0						0.96			0						0			0
North GP	Oldham, TX	2017	grain sorghum	35.19891N, -102.33038W	8/28/2017	57.6	2352.96	2410.56					0			0.96						0			0.96						0			0
North GP	Oldham, TX	2017	grain sorghum	35.19891N, -102.33038W	8/31/2017	20.16	410.88	431.04					0			0.96						1.92			0						0			0.96
North GP	Oldham, TX	2017	grain sorghum	35.19891N, -102.33038W	9/5/2017	161.28	13838.4	13999.7					0			0.96						4.8			1.92						0			0
North GP	Oldham, TX	2017	grain sorghum	35.19891N, -102.33038W	9/12/2017	22.08	30.72	52.8					0			0.96						0.96			0						0			0
North GP	Oldham, TX	2017	grain sorghum	35.19891N, -102.33038W	9/19/2017	19.2	19.2	38.4					0			2.88						0			0						0			0
North GP	Oldham, TX	2017	grain sorghum	35.26608N, -102.32712W	7/27/2017	0	0	0					0			0						0			1.92						0			0
North GP	Oldham, TX	2017	grain sorghum	35.26608N, -102.32712W	8/3/2017	0	0	0					0			0						0			0						0			0
North GP	Oldham, TX	2017	grain sorghum	35.26608N, -102.32712W	8/10/2017	0	0	0					0			0						0			0						0			0
North GP	Oldham, TX	2017	grain sorghum	35.26608N, -102.32712W	8/18/2017	0	0	0					0			0.96						0			0						0			0
North GP	Oldham, TX	2017	grain sorghum	35.26608N, -102.32712W	8/22/2017	9.6	130.56	140.16					0			0.96						0			0						0			0
North GP	Oldham, TX	2017	grain sorghum	35.26608N, -102.32712W	8/24/2017	22.08	186.24	208.32					0			2.88						0			0						0			0
North GP	Oldham, TX	2017	grain sorghum	35.26608N, -102.32712W	8/28/2017	9.6	165.12	174.72					0			0						0.96			0.96						0			0
North GP	Oldham, TX	2017	grain sorghum	35.26608N, -102.32712W	8/31/2017	2.88	161.28	164.16					0			0						0.96			0						0			0
North GP	Oldham, TX	2017	grain sorghum	35.26608N, -102.32712W	9/5/2017	2.88	312.96	315.84					0			0.96						0.96			0						0			0
North GP	Oldham, TX	2017	grain sorghum	35.26608N, -102.32712W	9/12/2017	43.2	360	403.2					0			0						0.96			0						0			0
North GP	Oldham, TX	2017	grain sorghum	35.26608N, -102.32712W	9/19/2017	138.24	1296.96	1435.2					0			0.96						0			0.96						0			0
North GP	Potter, TX	2017	grain sorghum	35.21199N, 102.05326W				28885	383	75.4178	4	1	0	0	0	1	3.462e-05	0.00261097	1	3.462e-05	0.00261097	2	6.92401e-05	0.00522193	4	0.00013848	0.0104439	6	0.00020772	0.0156658	9	0.00031158	0.0234987	6	0.00020772	0.0156658	2017-08-22	2017-09-15	wtex	Potter, TX	28367	1868	87246	32.5138	2.14107	41.9377	15.4586	78.5214	2017-08-22
North GP	Potter, TX	2017	grain sorghum	35.21199N, -102.05326W	8/22/2017	14.4	124.8	139.2	96				0			0						0			0.96						0			0
North GP	Potter, TX	2017	grain sorghum	35.21199N, -102.05326W	9/1/2017	17.1	2648.6	2665.7	96				0			0						0.95			0						0			0
North GP	Potter, TX	2017	grain sorghum	35.21199N, -102.05326W	9/7/2017	106.56	25205.8	25312.3	96				0			0						0			0						8.64			3.84
North GP	Potter, TX	2017	grain sorghum	35.21199N, -102.05326W	9/15/2017	98.88	669.12	768	96				0			0.96						0.96			2.88						0			1.92
South GP	Randall, TX	2018	grain sorghum	35.12778N, 101.72417W				262757	2496	105.271	11	3	10	3.8058e-05	0.00400641	10	3.8058e-05	0.00400641	20	7.6116e-05	0.00801282	947	0.00360409	0.379407	272	0.00103518	0.108974	1219	0.00463927	0.488381	81	0.00030827	0.0324519	83	0.000315881	0.0332532	2018-07-13	2018-09-12	wtex	Randall, TX	36111	7877	87246	41.3899	9.02849	46.7735	0.656764	78.5214	2018-07-13
South GP	Randall, TX	2018	grain sorghum	35.12778N, -101.72417W	7/13/2018	0	0	0	96				0			0						0			0						0			0
South GP	Randall, TX	2018	grain sorghum	35.12778N, -101.72417W	7/19/2018	0	0	0	96				0			0						0			2.88						0			0.96
South GP	Randall, TX	2018	grain sorghum	35.12778N, -101.72417W	7/25/2018	0	0	0	96				0			0						0			0.96						0			0
South GP	Randall, TX	2018	grain sorghum	35.12778N, -101.72417W	8/1/2018	6.72	79.68	86.4	96				0			0						0			0.96						0			0.96
South GP	Randall, TX	2018	grain sorghum	35.12778N, -101.72417W	8/8/2018	18.24	769.92	788.16	96				0			0						0			0.96						0			9.6
South GP	Randall, TX	2018	grain sorghum	35.12778N, -101.72417W	8/15/2018	297.6	9702.72	10000.3	96				0.96			0						14.4			4.8						0.96			3.84
South GP	Randall, TX	2018	grain sorghum	35.12778N, -101.72417W	8/21/2018	192.96	11617.9	11810.9	96				0			3.84						46.08			4.8						1.92			2.88
South GP	Randall, TX	2018	grain sorghum	35.12778N, -101.72417W	8/27/2018	157.44	14724.5	14881.9	96				0			0						21.12			8.64						0			0
South GP	Randall, TX	2018	grain sorghum	35.12778N, -101.72417W	9/5/2018	38.4	14.4	52.8	96				0			0						0			0						0			0.96
South GP	Randall, TX	2018	grain sorghum	35.12778N, -101.72417W	9/12/2018	27.84	16.32	44.16	96				0			0						0			0						0			0
South GP	Randall, TX	2018	grain sorghum	35.16725N, -102.09297W	7/24/2018	0	0	0	96				0			0						0.96			0.96						0			0
South GP	Randall, TX	2018	grain sorghum	35.16725N, -102.09297W	8/6/2018	9.6	279.36	288.96	96				0			0						0			1.92						0.96			0
South GP	Randall, TX	2018	grain sorghum	35.16725N, -102.09297W	8/15/2018	573.12	8185.92	8759.04	96				0			0						0.96			0.96						4.8			6.72
South GP	Randall, TX	2018	grain sorghum	35.16725N, -102.09297W	8/21/2018	306.24	20576.6	20882.9	96				1.92			0						13.44			1.92						15.36			2.88
South GP	Randall, TX	2018	grain sorghum	35.16725N, -102.09297W	8/27/2018	38.4	261.12	299.52	96				0			0						21.12			1.92						0.96			2.88
South GP	Randall, TX	2018	grain sorghum	35.16725N, -102.09297W	9/10/2018	24	74.88	98.88	96				0			0						5.76			3.84						0			0
South GP	Randall, TX	2018	grain sorghum	35.17194N, -101.75989W	7/13/2018	0	0	0	96				0			0						0			0						0			0
South GP	Randall, TX	2018	grain sorghum	35.17194N, -101.75989W	7/19/2018	0	0	0	96				0			0						0			0.96						0			0
South GP	Randall, TX	2018	grain sorghum	35.17194N, -101.75989W	7/25/2018	0	0	0	96				0			0						0			0						0			0
South GP	Randall, TX	2018	grain sorghum	35.17194N, -101.75989W	8/1/2018	5.76	19.2	24.96	96				0			0						0			0						0			1.92
South GP	Randall, TX	2018	grain sorghum	35.17194N, -101.75989W	8/8/2018	23.04	388.8	411.84	96				0			0						1.92			0.96						0.96			4.8
South GP	Randall, TX	2018	grain sorghum	35.17194N, -101.75989W	8/15/2018	560.64	7057.92	7618.56	96				2.88			0.96						14.4			0.96						8.64			9.6
South GP	Randall, TX	2018	grain sorghum	35.17194N, -101.75989W	8/21/2018	2302.08	17401.9	19704	96				0.96			4.8						5.76			0.96						13.44			6.72
South GP	Randall, TX	2018	grain sorghum	35.17194N, -101.75989W	8/27/2018	1540.8	87609.6	89150.4	96				0.96			0						176.64			7.68						23.04			3.84
South GP	Randall, TX	2018	grain sorghum	35.17194N, -101.75989W	9/5/2018	676.8	68797.4	69474.2	96				1.92			0						552.96			27.84						8.64			8.64
South GP	Randall, TX	2018	grain sorghum	35.17194N, -101.75989W	9/12/2018	452.16	7926.72	8378.88	96				0			0						71.04			61.44						0.96			15.36
North GP	Potter, TX	2018	grain sorghum	35.21199N, 102.05326W				300885	672	447.746	6	1	14	4.65294e-05	0.0208333	79	0.000262559	0.11756	93	0.000309088	0.138393	791	0.00262891	1.17708	305	0.00101368	0.453869	1096	0.00364259	1.63095	73	0.000242618	0.108631	18	5.98235e-05	0.0267857	2018-07-24	2018-09-10	wtex	Potter, TX	29477	2073	87246	33.7861	2.37604	35.8263	18.3814	78.5214	2018-07-24
North GP	Potter, TX	2018	grain sorghum	35.20769N, -102.05072W	7/24/2018	48.96	123.84	172.8	96				0			0						0			0.96						0			0
North GP	Potter, TX	2018	grain sorghum	35.20769N, -102.05072W	8/2/2018	3.84	169.92	173.76	96				0			0						0			47.04						0			0
North GP	Potter, TX	2018	grain sorghum	35.20769N, -102.05072W	8/7/2018	2377.92	532.8	2910.72	96				0			0						24			4.8						0.96			0
North GP	Potter, TX	2018	grain sorghum	35.20769N, -102.05072W	8/15/2018	2624.64	162248	164872	192				9.6			34.56						145.92			15.36						38.4			3.84
North GP	Potter, TX	2018	grain sorghum	35.20769N, -102.05072W	8/27/2018	5276.16	127475	132751	96				4.8			43.2						619.2			65.28						33.6			14.4
North GP	Potter, TX	2018	grain sorghum	35.20769N, -102.05072W	9/10/2018	3.84	0.96	4.8	96				0			0.96						1.92			19.2						0			0
North GP	Oldham, TX	2018	grain sorghum	35.19891N, 102.33038W				473352	1248	379.288	13	1	4	8.45037e-06	0.00320513	6	1.26756e-05	0.00480769	10	2.11259e-05	0.00801282	880	0.00185908	0.705128	238	0.000502797	0.190705	1118	0.00236188	0.895833	67	0.000141544	0.0536859	108	0.00022816	0.0865385	2018-07-12	2018-10-03	wtex	Oldham, TX	30429	2750	87228	34.8844	3.15266	56.4681	0.319851	78.5052	2018-07-12
North GP	Oldham, TX	2018	grain sorghum	35.20775N, -102.32908W	7/12/2018	0	0	0	96				0			0						0			0						0			0
North GP	Oldham, TX	2018	grain sorghum	35.20775N, -102.32908W	7/17/2018	0	0	0	96				0			0						0			0						0			0
North GP	Oldham, TX	2018	grain sorghum	35.20775N, -102.32908W	7/25/2018	0	0	0	96				0			0						0			0						0			0
North GP	Oldham, TX	2018	grain sorghum	35.20775N, -102.32908W	7/30/2018	0	0	0	96				0			0						0			0						0			0
North GP	Oldham, TX	2018	grain sorghum	35.20775N, -102.32908W	8/8/2018	3.84	41.28	45.12	96				0			0						0			0						0			0
North GP	Oldham, TX	2018	grain sorghum	35.20775N, -102.32908W	8/15/2018	465.6	1611.84	2077.44	96				0			0						0			1.92						0			0
North GP	Oldham, TX	2018	grain sorghum	35.20775N, -102.32908W	8/21/2018	477.12	6262.08	6739.2	96				0.96			0						0			0						0			0
North GP	Oldham, TX	2018	grain sorghum	35.20775N, -102.32908W	8/27/2018	573.12	17710.1	18283.2	96				0			1.92						1.92			0.96						10.56			2.88
North GP	Oldham, TX	2018	grain sorghum	35.20775N, -102.32908W	9/5/2018	1122.24	46566.7	47689	96				1.92			3.84						51.84			8.64						18.24			16.32
North GP	Oldham, TX	2018	grain sorghum	35.20775N, -102.32908W	9/12/2018	1154.88	62061.1	63216	96				0			0						218.88			8.64						14.4			24.96
North GP	Oldham, TX	2018	grain sorghum	35.20775N, -102.32908W	9/17/2018	1154.88	62061.1	63216	96				0			0						218.88			8.64						14.4			24.96
North GP	Oldham, TX	2018	grain sorghum	35.20775N, -102.32908W	9/27/2018	5038.08	153963	159001	96				0.96			0						215.04			47.04						8.64			34.56
North GP	Oldham, TX	2018	grain sorghum	35.20775N, -102.32908W	10/3/2018	6751.68	106333	113085	96				0			0						173.76			43.2						0.96			4.8
South	Refugio, TX	2019	grain sorghum	28.1583N, 97.2419W				3465	120	28.875	2	1	313	0.0903319	2.60833	4	0.0011544	0.0333333	317	0.0914863	2.64167	39	0.0112554	0.325	8	0.0023088	0.0666667	47	0.0135642	0.391667	0	0	0	2	0.000577201	0.0166667	2019-06-20	2019-06-24	Bonnie View	Refugio, TX	87242	22201	87242	100	25.4476	3.10057	2.91488	78.5178	2019-06-20
South	Calhoun, TX	2019	grain sorghum	28.6037N, 96.6849W				10928	165	66.2303	3	1	2053	0.187866	12.4424	11	0.00100659	0.0666667	2064	0.188873	12.5091	292	0.0267204	1.7697	67	0.00613104	0.406061	359	0.0328514	2.17576	35	0.00320278	0.212121	3	0.000274524	0.0181818	2019-06-20	2019-07-02	Port Lavaca	Calhoun, TX	49660	3417	86873	57.1639	3.93333	17.8536	1.87055	78.1857	2019-06-20
South	Hidalgo, TX	2019	grain sorghum	26.1918N, 97.9059W				21288	144	147.833	1	2	2541	0.119363	17.6458	4385	0.205985	30.4514	6926	0.325348	48.0972	395	0.0185551	2.74306	76	0.00357009	0.527778	471	0.0221251	3.27083	35	0.00164412	0.243056	10	0.000469748	0.0694444	2019-05-29	2019-05-29	RGV	Hidalgo, TX	57661	7425	87240	66.0947	8.511	6.74576	4.17011	78.516	2019-05-29
South	Cameron, TX	2019	grain sorghum	26.2798N, 97.6619W				51	72	0.708333	1	1	115	2.2549	1.59722	4	0.0784314	0.0555556	119	2.33333	1.65278	1	0.0196078	0.0138889	2	0.0392157	0.0277778	3	0.0588235	0.0416667	1	0.0196078	0.0138889	0	0	0	2019-05-29	2019-05-29	RGV	Cameron, TX	76768	23830	87237	87.9994	27.3164	1.78365	2.33158	78.5133	2019-05-29
South	Willacy, TX	2019	grain sorghum	26.3582N, 97.6860W				203	72	2.81944	1	1	53	0.261084	0.736111	2	0.00985222	0.0277778	55	0.270936	0.763889	1	0.00492611	0.0138889	0	0	0	1	0.00492611	0.0138889	0	0	0	4	0.0197044	0.0555556	2019-05-29	2019-05-29	RGV	Willacy, TX	82563	28253	87252	94.6259	32.3809	0.708293	0.496264	78.5268	2019-05-29
South	Fort Bend, TX	2019	grain sorghum	29.5083N, 95.8701W				606	60	10.1	1	1	35	0.0577558	0.583333	0	0	0	35	0.0577558	0.583333	6	0.00990099	0.1	0	0	0	6	0.00990099	0.1	6	0.00990099	0.1	0	0	0	2019-06-20	2019-06-20	Rosenburg	Fort Bend, TX	29580	6512	87240	33.9065	7.46447	26.1486	0.562815	78.516	2019-06-20
South	San Patricio, TX	2019	grain sorghum	27.9821N, 97.5047W				6552	240	27.3	2	2	815	0.124389	3.39583	70	0.0106838	0.291667	885	0.135073	3.6875	129	0.0196886	0.5375	16	0.002442	0.0666667	145	0.0221306	0.604167	3	0.000457875	0.0125	4	0.000610501	0.0166667	2019-06-05	2019-06-10	Sinton	San Patricio, TX	72979	29406	87257	83.6368	33.7004	3.71088	4.27702	78.5313	2019-06-05
South E	Shorter, AL	2018	grain sorghum	32.424389N, 85.889639W				100956	1440	70.1083	5	1	368	0.00364515	0.255556	40	0.000396212	0.0277778	408	0.00404136	0.283333	121	0.00119854	0.0840278	60	0.000594318	0.0416667	181.085	0.0017937	0.125754	1	9.90531e-06	0.000694444	3	2.97159e-05	0.00208333	2018-07-12	2018-08-09	EVS	Shorter, AL	19939	3	87235	22.8567	0.00343899	6.792	13.9015	78.5115	2018-07-12
South E	Shorter, AL	2019	grain sorghum	32.422444N, 85.890667W				264500	1150	230	5	1	5002	0.0189112	4.34957	47	0.000177694	0.0408696	5049	0.0190888	4.39043	304	0.00114934	0.264348	68	0.000257089	0.0591304	372.265	0.00140743	0.323709	60	0.000226843	0.0521739	6	2.26843e-05	0.00521739	2019-07-10	2019-08-01	EVS	Shorter, AL	21037	21	87235	24.1153	0.0240729	8.28452	3.47911	78.5115	2019-07-10
South E	Shorter, AL	2016	grain sorghum	32.422444N, 85.890667W				343140	4800	71.4875	5	1	271	0.000789765	0.0564583	125	0.000364283	0.0260417	422	0.00122982	0.0879167	6	1.74856e-05	0.00125	110	0.000320569	0.0229167	116	0.000338054	0.0241667	91	0.000265198	0.0189583	27	7.86851e-05	0.005625	2016-08-02	2016-08-30	EVS-FC	Shorter, AL	16702	55	87235	19.146	0.0630481	5.5104	10.2046	78.5115	2016-08-02
South E	Headland, AL	2016	grain sorghum	31.354640N, 85.326409W				116658	6400	18.2278	5	1	109	0.000934355	0.0170313	81	0.000694337	0.0126563	316	0.00270877	0.049375	33	0.000282878	0.00515625	59	0.000505752	0.00921875	92	0.00078863	0.014375	98	0.000840062	0.0153125	24	0.00020573	0.00375	2016-07-21	2016-08-18	WREC	Headland, AL	48216	129	87247	55.2638	0.147856	1.97256	12.3832	78.5223	2016-07-21
South E	Headland, AL	2015	grain sorghum	31.354640N, 85.326409W				733377	2040	359.499	4	2	37	5.04515e-05	0.0181373	26	3.54524e-05	0.0127451	63	8.5904e-05	0.0308824	27	3.6816e-05	0.0132353	52	7.09049e-05	0.0254902	79	0.000107721	0.0387255	84	0.000114539	0.0411765	18	2.4544e-05	0.00882353	2015-07-23	2015-08-13	WREC	Headland, AL	49302	536	87247	56.5085	0.614348	1.62183	12.7592	78.5223	2015-07-23
South E	Tallassee, AL	2015	grain sorghum	32.496151N, 85.890921W				250971	1600	156.857	4	1	57	0.000227118	0.035625	10	3.98452e-05	0.00625	67	0.000266963	0.041875	16	6.37524e-05	0.01	93	0.000370561	0.058125	111	0.000442282	0.069375	27	0.000107582	0.016875	10	3.98452e-05	0.00625	2015-07-21	2015-08-12	PBU	Tallassee, AL	26102	89	87242	29.9191	0.102015	5.8779	10.6875	78.5178	2015-07-21
South E	Prattville, AL	2015	grain sorghum	32.426550N, 86.445955W				301361	5280	57.0759	7	1	115	0.000381602	0.0217803	5	1.65914e-05	0.00094697	120	0.000398194	0.0227273	16	5.30925e-05	0.0030303	173	0.000574062	0.0327652	189	0.000627155	0.0357955	58	0.00019246	0.0109848	43	0.000142686	0.00814394	2015-07-20	2015-09-07	Prattville	Prattville, AL	9850	23	87233	11.2916	0.0263662	5.7868	8.24229	78.5097	2015-07-20
South E	Brewton, AL	2015	grain sorghum	31.140646N, 87.048516W				671934	3020	222.495	5	2	150	0.000223236	0.0496689	26	3.86943e-05	0.00860927	176	0.00026193	0.0582781	16	2.38119e-05	0.00529801	50	7.4412e-05	0.0165563	66.0053	9.82318e-05	0.0218561	70	0.000104177	0.0231788	23	3.42295e-05	0.00761589	2015-07-21	2015-08-10	Brewton	Brewton, AL	3786	2	87242	4.33965	0.00229247	4.70186	16.3178	78.5178	2015-07-21
South E	Fairhope, AL	2015	grain sorghum	30.546251N, 87.880608W				35669	800	44.5862	2	1	30	0.000841066	0.0375	8	0.000224284	0.01	38	0.00106535	0.0475	0	0	0	8	0.000224284	0.01	8	0.000224284	0.01	2	5.60711e-05	0.0025	0	0	0	2015-07-22	2015-07-28	GCREC	Fairhope, AL	16460	139	71212	23.1141	0.195192	10.3817	4.63967	64.0908	2015-07-22
[truncated: 7 more columns]
